1 **Unveiling unexpected complexity and multipotentiality of early heart fields**

2

3

4 Qingquan Zhang<sup>1\*</sup>, Daniel Carlin<sup>1\*</sup>, Fugui Zhu<sup>1</sup>, Paola Cattaneo<sup>1</sup>, Trey Ideker<sup>2,3</sup>, Sylvia M.

5 Evans<sup>1,4§</sup>, Joshua Bloomekatz<sup>1,5§</sup> and Neil C. Chi<sup>1,3§</sup>

6

7 INSTITUTION

8 <sup>1</sup> *Department of Medicine, Division of Cardiology, University of California San Diego, La*  
9 *Jolla, CA 92093, USA.*

10 <sup>2</sup> *Department of Medicine, Division of Genetics; Department of Computer Science and*  
11 *Engineering; Department of Bioengineering, University of California San Diego, La Jolla,*  
12 *CA 92093, USA.*

13 <sup>3</sup> *Institute of Genomic Medicine, University of California, San Diego, La Jolla, CA 92093,*  
14 *USA.*

15 <sup>4</sup> *Department of Pharmacology, Skaggs School of Pharmacy and Pharmaceutical Sciences,*  
16 *University of California at San Diego, La Jolla, CA 92093, USA.*

17 <sup>5</sup> *Current address: Department of Biology, The University of Mississippi, University, MS*  
18 *38677, USA.*

19

20

21 \* contributed equally

22 § corresponding authors

23

24 Correspondence: Evans, Sylvia ([syevans@ucsd.edu](mailto:syevans@ucsd.edu)), Joshua Bloomekatz

25 ([josh@olemiss.edu](mailto:josh@olemiss.edu)), Neil Chi ([nchi@health.ucsd.edu](mailto:nchi@health.ucsd.edu))

26

27

28 **Abstract**

29 Complex organs are composed of a multitude of specialized cell types which assemble to  
30 form functional biological structures. How these cell types are created and organized  
31 remains to be elucidated for many organs including the heart, the first organ to form during  
32 embryogenesis. Here, we show the ontogeny of mammalian mesoderm at high-resolution  
33 single cell and genetic lineage/clonal analyses, which revealed an unexpected complexity of  
34 the contribution and multi-potentiality of mesodermal progenitors to cardiac lineages creating  
35 distinct cell types forming specific regions of the heart. Single-cell transcriptomics of  
36 *Mesp1* lineage-traced cells during embryogenesis and corresponding trajectory analyses  
37 uncovered unanticipated developmental relationships between these progenitors and lineages  
38 including two mesodermal progenitor sources contributing to the first heart field (FHF), an  
39 intraembryonic and a previously uncharacterized extraembryonic-related source, that produce  
40 distinct cardiac lineages creating the left ventricle. Lineage-tracing studies revealed that  
41 these extraembryonic-related FHF progenitors reside at the extraembryonic-intraembryonic  
42 interface in gastrulating embryos and generate cardiac cell types that form the epicardium and  
43 the dorsolateral regions of the left ventricle and atrioventricular canal myocardium. Clonal  
44 analyses further showed that these progenitors are multi-potent, creating not only  
45 cardiomyocytes and epicardial cell types but also extraembryonic mesoderm. Overall, these  
46 results reveal unsuspected multiregional origins of the heart fields, and provide new insights  
47 into the relationship between intraembryonic cardiac lineages and extraembryonic tissues and  
48 the associations between congenital heart disease and placental insufficiency anomalies.

## 49 **Introduction**

50 Embryonic development is a process by which a single cell with potential to give rise to all  
51 cells within the embryo progressively creates groups of cells with more restricted potential.  
52 A developmental field is a collection of cells with a shared potential to produce a restricted  
53 subset of embryonic structures. By their nature, developmental fields are transient and  
54 present only at specific developmental stages. Studies of heart development over the last  
55 few decades have defined a first heart field (FHF) and a second heart field (SHF), according  
56 to their potential to give rise to specific myocardial lineages within the developing heart<sup>1</sup>.

57 The FHF and SHF were inferred by retrospective clonal analyses in the mouse embryo,  
58 which revealed two clonally distinct differentiated myocardial lineages, the first and second  
59 heart lineages, respectively<sup>2-4</sup>. At E8.5, clones of the first heart lineage were observed to be  
60 excluded from the outflow tract, populate the entire left ventricle (LV) and left  
61 atrioventricular canal (AVC), and contribute some cells to both atria and right ventricle (RV),  
62 whereas clones of the second heart lineage were found to be excluded from the LV<sup>2</sup>. Of the  
63 heart fields predicted by this model, the SHF has been visualized and defined, as a population  
64 of cells medial to the differentiating myocardial cells of the cardiac crescent that expresses  
65 the transcription factor *Isl1* around E7.75<sup>5</sup>. SHF cells expressing *Isl1* will also give rise to  
66 multiple other cell types that contribute to the heart, pharyngeal arches and head/neck  
67 including endothelial, endocardial and smooth/skeletal muscle cells<sup>5-11</sup>. At E7.75, the first  
68 differentiating cells in the cardiac crescent are marked by the ion channel *Hcn4*. As *Hcn4*-  
69 *CreERT2* labeled cells in the crescent mainly contribute to cardiomyocyte lineages in the LV  
70 and parts of the atria, they are thought to represent more differentiated precursors of first  
71 heart lineage cardiomyocytes, and for that reason have been considered as representatives of  
72 the FHF at crescent stages<sup>12,13</sup>. However, the origins and attributes of FHF progenitors prior  
73 to cardiac crescent stages remain unknown.

74 In addition to myocardial and endocardial lineages, the fully formed heart includes  
75 fibroblasts and vascular support cells that derive from the epicardium. The proepicardium, a  
76 transient cluster of cells that forms at the base of the looping heart from the septum  
77 transversum (ST) during early heart development, produces cells which cover the heart  
78 surface as an epithelium to form the epicardium<sup>14</sup>. Subsets of cells from the epicardium will  
79 migrate into the myocardium to give rise to cardiac fibroblasts and vascular support cells of  
80 the coronary vasculature, which are essential for formation and function of the heart<sup>15-17</sup>.  
81 Yet, the developmental origin of the proepicardium, and its relationship to previously  
82 described heart fields remains to be defined<sup>18</sup>.

83 To address the developmental origins, definition and contribution of specific cell  
84 lineages creating the heart, we performed single cell transcriptomic analyses on *Mesp1-cre*;  
85 *Rosa26-tdTomato (Rosa26-tdT)* mouse embryos across key developmental stages of cardiac  
86 development. Computational trajectory analyses of these data notably predicted a potential  
87 group of progenitors specifically expressing *Hand1* that may give rise to a subset of first  
88 heart lineage cardiomyocytes. Notably, *in situ* and lineage tracing analyses utilizing *Hand1-*  
89 *CreERT2* revealed a *Hand1*-expressing population at the extraembryonic/intraembryonic  
90 boundary of the gastrulating embryo that contributes to first heart lineage cardiomyocytes  
91 residing largely within dorsolateral regions of the LV and AVC. Intriguingly, the *Hand1-*  
92 *CreERT2* lineage created only a subset of (rather than all) LV cardiomyocytes. As the  
93 second heart lineage does not populate the LV<sup>2</sup>, this finding implies a previously unexpected  
94 complexity of the FHF in which the FHF is not a single developmental heart field, but rather  
95 composed of at least two distinct developmental heart fields, one of which, identified here, is  
96 marked by *Hand1*. Earlier studies have presumed that the FHF, in contrast to the SHF, has a  
97 tightly restricted developmental potential, only giving rise to myocardial cells within specific  
98 segments of the heart. Utilizing *Hand1-CreERT2* and *Rosa26-Confetti* clonal analyses, we

99 surprisingly found that the *Hand1-CreERT2*-marked FHF is composed of multipotent cells  
100 that give rise to not only first heart lineage myocardial cells, but also serosal mesothelial  
101 lineages (including proepicardium/epicardium and pericardium), and cells within  
102 extraembryonic mesoderm.

103 Overall, our results reveal a closer lineage relationship than previously suspected  
104 between cardiac tissues and extraembryonic mesoderm. Our observation that the *Hand1*  
105 expressing segment of the FHF gives rise to epicardial cells also provides insight into the  
106 developmental origins of the epicardium, thus uncovering a new early clonal relationship  
107 between cardiac muscle cells of the first heart lineage and cells of the epicardium.

108

## 109 **Results**

### 110 **scRNA-seq analysis of *Mesp1* lineage-traced cells reveals developmental cell types** 111 **participating in mesoderm-related organogenesis.**

112 As *Mesp1* is known to mark early mesoderm, we employed a mouse *Mesp1-Cre*<sup>19</sup>; *Rosa26-*  
113 *tdTomato* (*R26R-tdT*)<sup>20</sup> genetic fate mapping system to permanently label and track all cell  
114 lineages contributing to the development of mesoderm-derived organs including the heart  
115 <sup>19,21-24</sup> (Fig. 1a). To discover the broad spectrum of developmental cell types participating in  
116 this process, we interrogated the transcriptomes of individual *Mesp1-Cre*; *Rosa26-tdT*  
117 genetically-labeled cells utilizing single-cell RNA-sequencing (scRNA-seq) (Fig. 1a).  
118 Because of our focus on early mesoderm-related organogenesis, we specifically examined  
119 isolated *Mesp1-Cre*; *Rosa26-tdT* single cells at E7.25 (no bud stage), E7.5 (early bud stage),  
120 E7.75 (late head fold stage) and E8.25 (somite stage) (Fig. 1a, Extended Data Fig. 1). Each  
121 sample was processed and analyzed through our standard pipeline and confirmed for replicate  
122 reproducibility (Extended Data Fig. 1a-c). t-distributed stochastic neighbor embedding  
123 (tSNE) visualization and unsupervised k-means clustering<sup>25</sup> of these combined single cell  
124 data revealed a broad array of cell types, which were identified based on gene expression,

125 during mesoderm development (Fig. 1b-f, Extended Data Fig. 1 and 2, Supplementary Table.  
126 1). As mesodermal progenitors differentiated into organ-specific cell types during mouse  
127 embryogenesis, we observed that the number of identified cell-types increased with  
128 developmental age. For example, nascent, early-extraembryonic and hemogenic mesoderm  
129 (NM, EEM, Hem) cell types were detected at E7.25 as previously described<sup>26,27</sup>; however,  
130 many more intermediate and differentiated organ-specific cell types were identified by E7.75  
131 and E8.25, including two cardiomyocyte clusters – developing cardiomyocytes (DC) and  
132 cardiomyocytes (CM) (Fig. 1b). These cell clusters appear to represent early (developing)  
133 and more established cardiomyocytes, respectively, based on their differential expression of  
134 sarcomeric (*Tnnt2*, *Ttn* and *Myl3*) and cardiac progenitor genes (*Tbx5*, *Sfrp1/5* and *Meis1*)  
135 (Fig. 1f).

136

### 137 **Trajectory analysis elucidates developmental pathways during mesoderm** 138 **organogenesis.**

139 To illuminate the developmental origins and cell fate decisions of organ-specific cell types  
140 arising from mesodermal progenitor cells including cardiac cell types, we organized cells  
141 from our single cell data along developmental trajectories using the lineage inference  
142 analysis, URD<sup>28</sup>, which is based on a random walk of the nearest neighbor graph of gene  
143 expression. These reconstructed developmental trajectories, as displayed in the tree structure  
144 that URD produces, not only ordered cells by a pseudotime which correlate with the  
145 developmental age of analyzed cells but also revealed both new and known developmental  
146 cell fate decisions (Fig. 2a, Extended Data Fig. 3a). In particular, we observed  
147 developmental trajectories that identified previously described mechanisms of development  
148 for some discovered cell types including the early differentiation and bifurcation of  
149 endothelial and blood cells<sup>29</sup>, the differentiation of somitic mesoderm from a pre-somitic state  
150 originating in the caudal mesoderm<sup>30,31</sup> and a common progenitor that gives rise to cranial

151 pharyngeal, lateral plate mesoderm and cardiomyocytes<sup>1,9,11,32</sup> (Fig. 2a). On the other hand,  
152 examination of the cardiomyocyte developmental trajectory uncovered two potential  
153 developmental sources that may contribute to developing cardiomyocytes: a known  
154 intraembryonic progenitor from the lateral plate mesoderm (LPM) and a previously  
155 undescribed cardiac progenitor from the late extraembryonic mesoderm (LEM) (Fig. 2a,  
156 box). Viewing these developmental trajectories as a three-dimensional force-directed URD  
157 representation revealed how these two progenitor sources originate and then converge to  
158 independently contribute to developing cardiomyocytes (Fig. 2b, Extended Data Fig. 3b).  
159 Consistent with these findings, we further discovered from a URD lineage inference analysis  
160 of previously published mouse embryonic scRNA-seq data<sup>27</sup> that analogous LPM and LEM  
161 cells could be identified forming similar developmental trajectories contributing to  
162 developing cardiomyocytes (Extended Data Fig. 3c-e). Thus, our bioinformatic analyses  
163 support that cells with an extraembryonic signature (LEM) may contribute to the heart in a  
164 trajectory that is separate from that of the embryonic (LPM) lineage.

165

### 166 **Multiple developmental pathways create distinct cardiomyocyte populations.**

167 Previous studies have reported the existence of distinct populations of cardiomyocytes during  
168 heart development which arise from distinct heart fields<sup>2-4</sup>. Thus, we investigated whether  
169 these specific cardiomyocyte populations could be detected as subclusters within our initially  
170 identified developing cardiomyocyte (DC)/cardiomyocyte (CM) clusters (Fig. 1d), and  
171 furthermore how LPM and LEM cells in our cardiomyocyte trajectories may specifically  
172 contribute to these subclusters (Fig. 2b - magnification). As a result, subclustering analysis  
173 of cells specifically comprising the initial developing cardiomyocyte/cardioyocyte branches  
174 (Fig. 2a, b –boxed area, magnification: LEM, LPM, DC and CM) uncovered seven distinct  
175 sub-populations (Fig. 2c, d, Extended Data Fig. 4a, Supplementary Table 2). Three of these

176 sub-clusters exhibited increased expression of cardiomyocyte sarcomeric genes such as *Ttn*,  
177 *Tnnt2*, and *Myl7* (Fig. 2c, d, Cardiomyocyte/CM1-3, Extended Data Fig. 4a, b), and  
178 correlated with the CM cluster (Fig. 2c - boxed area), whereas the other four sub-clusters  
179 displayed relatively low expression of these sarcomeric genes but high expression of cardiac  
180 progenitor (CP) markers such as *Isl1*, *Sfrp5*, *Tbx5* (Fig. 2c, d, Cardiac Progenitor/CP4-7,  
181 Extended Data Fig. 4a, c), and associated closely with the DC cluster and specific portions of  
182 LPM and LEM clusters (Fig. 2c - unboxed area). Differential gene marker analyses of the  
183 CM subclusters revealed that CM1, CM2 and CM3 cells displayed a combinatorial  
184 enrichment of *Irx4/Tbx5*, *Tdgf1/Isl1* and *Mab21l2/Tbx5*, respectively, and that CM1 cells  
185 exhibited increased expression of mature cardiomyocyte gene markers including *Actc1*,  
186 *Actn2*, *Myh6*, *Myh7* and *Myl1* (Extended Data Fig. 4a, d). Thus, these findings indicate that  
187 CM1 and CM2 subclusters may represent cardiomyocytes arising from the FHF and SHF<sup>3-</sup>  
188 <sup>5,7,12,13,33-36</sup>, whereas the developmental source of the CM3 subcluster remains to be identified.  
189 Additional gene marker analyses of CP subclusters support that cell types from some of these  
190 subclusters may represent cardiac progenitors for not only cardiomyocytes but also  
191 potentially other differentiated cardiac cell types (Fig. 2d, Extended Data Fig. 4a, c). For  
192 instance, CP6 and CP7 expressed genes that overlapped with those in not only CM3 cells but  
193 also proepicardial cells (*Upk3b*, *Ccbe1*, *Sfrp5*, *Mab21l2*, *Tbx18*<sup>37-43</sup>) (Extended Data Fig. 4a),  
194 suggesting that CP6/CP7 subclusters may contain progenitors for both CM3 and  
195 proepicardial cells.

196 To confirm the identity of potentially known subcluster cell types, annotate those that  
197 remain to be elucidated and further investigate their relationship during embryogenesis, we  
198 spatially mapped these cell types in E8.25 embryos when these cell types are present using  
199 RNAscope *in situ* hybridization (ISH) analysis of markers that are individually or  
200 combinatorially specific to these subclusters (Fig. 2e-k). Results from these studies revealed



201 that *Irx4*, *Tdgfl* and *Mab21l2*, markers of CM1, CM2 and CM3 subclusters, respectively,  
202 were expressed in three distinct regions of the heart tube as labeled by *Myh7* and *Nkx2-5*: the  
203 middle segment (Primitive left ventricle/LV), arterial pole (Primitive outflow tract/OFT and  
204 right ventricle/RV), and venous pole of the heart tube, respectively (Fig. 2e, f), and thus  
205 indicate that CM1 and CM2 cells correspond to cardiomyocytes derived from the FHF and  
206 SHF, respectively<sup>3-5,7,12,13,33-36</sup>, whereas the source of progenitors giving rise to CM3  
207 cardiomyocytes remains to be determined. Using a combination of genes that are  
208 differentially expressed in the CP subclusters, we further investigated the location of CP  
209 subcluster cell types during embryogenesis (Fig. 2d, g-k, Extended Data Fig. 4a, c). We  
210 discovered that the combined CP4 markers *Sfrp5* and *Nr2f2* were specifically expressed in  
211 regions posterior to the venous pole and contiguous with CM1 (Fig. 2g). The CP5 marker  
212 *Isl1* was enriched in regions anterior and dorsal to the arterial pole and contiguous with CM2  
213 (Fig. 2h). The combined CP6 markers *Smoc2* and *Mab21l2* were expressed at the interface  
214 between the forming heart and extraembryonic tissues, near the ventral venous pole and  
215 contiguous with CM3 (Fig. 2i), and the combined CP7 markers *Sfrp5* and *Mab21l2* were  
216 located in a region connected to the ventral side of the venous pole and contiguous with CP6  
217 (Fig. 2j). The adjacent locations of CP6 and CP7 and a large number of overlapping genes  
218 between them (*Cpa2*, *Mab21l2*, *Bmp4*, *Hand1*) (Fig. 2d, i, j, Extended Data Fig. 4a, c),  
219 suggest that CP6 and CP7 may be developmentally related.

220 Based on these subcluster analysis findings, we further investigated the developmental  
221 relationship of the CM1-3 subpopulations and specifically how LPM and LEM progenitors  
222 may contribute to them. To this end, we reconstructed our developmental trajectories (Fig.  
223 3a, b, Extended Data Fig. 5) using the three CM subcluster populations CM1-3 (Fig. 2c -  
224 instead of the CM cluster from the initial tSNE cluster, Fig. 1d) as end points for our URD  
225 trajectory analysis<sup>28</sup>. As a result, the modified URD developmental trajectory tree created

226 three new cardiomyocyte trajectory branches for each CM subcluster (Fig. 3a, b, box). The  
227 CM1 and CM2 trajectory branches, whose cells expressed genes associated with FHF (*Tbx5*)  
228 and SHF (*Isl1/Tdgfl*), respectively (Fig. 2d, Extended Data Fig. 4a, b), shared a common  
229 intraembryonic cellular origin associated with LPM and NM cells, whereas the CM3 lineage  
230 branch was distinct from the CM1 and CM2 branches and appeared to share an origin with  
231 early and late extraembryonic mesoderm (EEM and LEM) cells (Fig. 3a, b, Extended Data  
232 Fig. 5). Furthermore, the CM2 and cranial-pharyngeal (CrPh) branches expressed the SHF  
233 marker, *Isl1*, and appeared along a developmentally related trajectory consistent with  
234 previous studies of SHF development<sup>5,6,8,9,11</sup> (Fig. 3a-c).

235

236 **Interrogating transcriptional profiles of CM1-3 lineage branches uncovers distinct cell**  
237 **fate programs for each cardiomyocyte population.**

238 To identify gene programs that regulate the cell fate decisions creating these distinct  
239 cardiomyocyte lineages, we further interrogated the transcriptional profiles of cells along  
240 each of the cardiomyocyte developmental trajectories within the URD branching tree. To  
241 this end, we created a Random Forest model to classify and assign an importance score to  
242 transcription factors that may participate in directing cells to a specific daughter branch at  
243 each branch point examined in the URD tree<sup>44</sup>. These transcription factors were then ranked  
244 based on their importance score, and the top ten transcription factors that were predicted most  
245 likely to direct these branch point decisions were selected for each daughter branch  
246 (Extended data Fig. 6a-c). Expanding our analysis beyond transcription factors, we further  
247 identified the top twenty genes that were differentially expressed between daughter cells  
248 immediately after each branch point (Extended data Fig. 6d-g, Supplementary Table 3).  
249 These analyses revealed that *Hand1* appeared important for the initial branch point decision  
250 between embryonic NM and EEM (branch point 1) (Fig. 3c, Extended Data Fig. 6a-d), which  
251 coincides with the role of *Hand1* in extraembryonic mesoderm development<sup>45,46</sup>. Supporting

252 previous cardiac developmental studies<sup>3,5,47-49</sup>, we observed that the transcription factors  
253 *Tbx5*, *Isl1*, *Hand2* and *Tbx1* exhibited differential expression and/or importance in FHF-  
254 related CM1, SHF-related CM2 and SHF-related CrPh cell-types at branch point 3 after their  
255 specification from intraembryonic NM/LPM cells (Figure 3c, Extended Data Fig. 6a-c, f).  
256 In the extraembryonic branch, *Cdx2/Cdx4* and *Tsc22d1* were reciprocally expressed at branch  
257 point 2 where allantois (A) and LEM cells arise from EEM cells (Extended Data Fig. 6a, c,  
258 e). Furthermore, *Mef2c*, *Id2* and *Cited2*, which were expressed in CM3 cells and have been  
259 implicated in cardiac development<sup>50-54</sup>, and *Hoxb6* and *Hand1*, which were expressed in the  
260 LEM cells, were predicted to play key roles in regulating cell fate decisions at branch point 4  
261 (Extended Data Fig. 6a-c, g).

262 To further illuminate the dynamics of cell fate choices and corresponding differentiation  
263 states among these cardiomyocyte lineages, we examined genes differentially expressed in  
264 each cardiomyocyte lineage trajectory along a pseudotime from least to most differentiated  
265 conditions (Extended Data Fig. 7). These pseudotime analyses revealed at least three major  
266 differentiation states for each CM trajectory: an early, intermediate and late state (Extended  
267 Data Fig. 7g-i). Consistent with our branch point analyses (Extended Data Fig. 6), genes for  
268 the CM1 and CM2 early states were similar to each other but notably distinct from those for  
269 the CM3 early state; however, genes across these pseudotime analyses converged as each  
270 intermediate state cardiac progenitor differentiated into its corresponding late state  
271 cardiomyocyte population (Extended Data Fig. 7). In particular, *Mesp1* was expressed in the  
272 CM1 and CM2 early states but *Tbx5* and *Isl1* were reciprocally activated in these lineages at  
273 intermediate states (Fig. 3c, Extended Data Fig. 7a, b, d, e, g, h), suggesting that CM1 and  
274 CM2 may derive from a common developmental trajectory but *Tbx5* and *Isl1* may direct their  
275 specification in more distinct cardiomyocyte populations. On the other hand, *Hand1* and  
276 BMP signaling related genes *Bmp4* and *Msx2* were primarily expressed in CM3 early states,

277 and *Mab21l2* and *Cpa2* were activated in CM3 intermediate states (Fig. 3c, Extended Data  
278 Fig. 7c, f, i). Finally, *Mef2c* and other sarcomeric genes (*Tnnt2*) were commonly expressed  
279 at the late state of CM1-3 lineages; however, some genes appeared to be specific for each CM  
280 population at this state including *Irx4* (CM1) and *Tdgfl* (CM2) (Extended Data Fig. 7d-i).  
281 Confirming these analyses, RNAscope ISH revealed that *Hand1* was expressed at the  
282 boundary of embryonic and extraembryonic tissues, whereas *Mesp1* was expressed in the  
283 proximal portion of the intraembryonic migrating mesoderm at E7.25 and E7.5 (Fig. 3d, e).  
284 Furthermore, *Hand1*, *Tbx5* and *Isl1* marked different locations in the crescent region at E7.75  
285 where *Hand1* labeled a region anterior and lateral to the cardiac crescent, which was marked  
286 by *Tbx5*<sup>33,34</sup>, while *Isl1* labeled cells posterior and medial to the cardiac crescent as previously  
287 reported<sup>5</sup> (Fig. 3f, g, Extended Data Fig. 8). Altogether, these bioinformatic and spatial gene  
288 expression analyses reveal a potentially unexplored developmental source of cardiomyocytes  
289 along the proximal extraembryonic-embryonic boundary that may be distinct from the  
290 previously described FHF and SHF progenitors.

291  
292 ***Hand1* lineage tracing reveals an unexpected heart field that contributes to specific**  
293 **subsets of the first heart lineage and serosal mesothelial lineages.**

294 To examine and developmentally define this predicted extraembryonic-related developmental  
295 heart field, we employed an inducible Cre-recombinase genetic fate mapping strategy to  
296 lineage trace cells from this potential heart field during embryogenesis. Based on our  
297 interrogation of transcriptional profiles of cells along the CM URD trajectory branches, we  
298 discovered that *Hand1* was expressed in early extraembryonic-related CM3 progenitors but  
299 not CM1 and CM2 progenitors, thus identifying *Hand1* as a potential candidate gene to  
300 genetically label progenitors from the CM3 heart field (Fig. 3c). To further explore this  
301 possibility, we performed additional RNAscope ISH analyses to examine the expression of  
302 *Hand1* in the developing embryo and more specifically in these distinct cardiomyocyte

303 progenitors. These studies revealed that *Hand1*<sup>+</sup> mesoderm cells co-expressed *Mesp1* at the  
304 extraembryonic/embryonic boundary between E6.25 and E6.75 (Fig. 4a, Extended Data Fig.  
305 9a) but downregulated *Mesp1* after E6.75 (Fig. 3d, e). Consistent with previous reports<sup>55-57</sup>,  
306 *Hand1* was expressed in the extraembryonic mesoderm at E7.75, E8.25 and pericardium at  
307 E8.25 but not in *Hcn4*<sup>+</sup> or *Myl7*<sup>+</sup> cardiomyocytes at any of these stages (Fig. 4b, c, Extended  
308 Data Fig. 9b-e). However, at E8.5 and E9.0, *Hand1* was expressed in a portion of  
309 cardiomyocytes in the LV and AVC as well as the pericardium and septum transversum (ST)  
310 (Extended Data Fig. 9f, g). Thus, the expression pattern of *Hand1* reveals a developmental  
311 time window (E6.25 - E8.25) in which the contributions of early gastrulating *Hand1*<sup>+</sup> CM3  
312 progenitors to the heart can be investigated by *Hand1-CreERT2* lineage tracing.

313 Accordingly, we generated a *Hand1-CreERT2* mouse by inserting a *P2a-CreERT2*  
314 cassette into the second exon of the *Hand1* gene (Fig. 4d, Extended Data Fig. 10a, b).  
315 RNAscope ISH studies confirmed that expression of *CreERT2* precisely recapitulated that of  
316 *Hand1* (Fig. 4e, Extended Data Fig. 10c, d). As a result, *Hand1-CreERT2* mice were bred  
317 with the *Rosa26-tdT* reporter mice to perform lineage tracing studies (Fig. 4d). Confirming  
318 the fidelity of the CreERT2 activity, Cre leakage was not observed in *Hand1-CreERT2*;  
319 *Rosa26-tdT* embryos without tamoxifen induction (Extended Data Fig. 10e). Because  
320 previous studies including our own (Extended Data Fig. 11) have shown that the half-life of  
321 tamoxifen in mice is ~12 hours and persists over a ~24–36 hour time period<sup>58,59</sup>, we studied  
322 *Hand1-CreERT2*; *Rosa26-tdT* embryos from pregnant mice given tamoxifen at E5.75 (Fig.  
323 4f) to avoid the possibility that a small amount of residual tamoxifen would activate *CreERT2*  
324 in differentiated cardiomyocytes expressing *Hand1* at E8.5. Consistent with our CM  
325 trajectory branches (Fig. 3c), examination of these genetically-labeled embryos at E7.75,  
326 E8.25, E8.5, E9.5 and E12.5 revealed that *Hand1* lineage-traced cells contributed to not only  
327 extraembryonic tissue but also the heart (Fig. 4g-n, Extended Data Fig. 12). Within

328 extraembryonic tissues, which were tdT-labeled throughout the yolk sac across all examined  
329 stages (Fig. 4g-l, Extended Data Fig. 12b), *Hand1* lineage-traced tdT<sup>+</sup> cells produced  
330 *Pecam*<sup>+</sup> endothelial cells,  $\alpha$ -SMA<sup>+</sup> smooth muscle cells and *Pdgfr* $\beta$ <sup>+</sup> mesothelial cells  
331 (Extended Data Fig. 12e, f). On the other hand, *Hand1* lineage-traced tdT<sup>+</sup> cells contributed  
332 to the developing embryo in a more spatial and temporal restricted manner (Fig. 4g-n).  
333 Specifically, *Hand1* lineage-traced tdT<sup>+</sup> cells supplied *Hcn4*<sup>+</sup> cardiomyocytes in the cardiac  
334 crescent at E7.75 and then cardiomyocytes (*Myl7*<sup>+</sup>) on the ventral side of the venous pole and  
335 medial regions of the heart tube at E8.25 (Fig. 4g-j). At later stages (E8.5 - E12.5), tdT<sup>+</sup>  
336 cardiomyocytes were increasingly restricted spatially to the primitive AVC region and LV at  
337 E8.5 and then further to the AVC/sinus venosus (SV), dorsolateral LV and atrial regions of  
338 the heart at E12.5 (Fig. 4k-n, Extended Data Fig. 12b, d). Furthermore, tdT<sup>+</sup> cells appeared  
339 in non-myocardial heart tissue including the pericardium, proepicardium/ST, epicardium, and  
340 occasionally endocardium from E8.25 - E12.5 (Fig. 4i-n, Extended Data Fig. 12a-d).  
341 Supporting these lineage studies, the CM3 URD tree branch, which included the CP6 and  
342 CP7 subclusters, comprised cells that express AVC markers (*Msx1/2*, *Twist1*, *Tbx2*<sup>42,60-62</sup>), as  
343 well as proepicardial/pericardial markers (*Upk3b*, *Ccbe1*, *Sfrp5*, *Mab21l2*, *Tbx18*<sup>37-43</sup>)  
344 (Extended Data Fig. 4a). Finally, to confirm these findings and investigate additional early  
345 gastrulating *Hand1*<sup>+</sup> CM3 progenitors that may not have been labeled at E5.75, we examined  
346 *Hand1-CreERT2*; *Rosa26-tdT* embryos from pregnant mice given tamoxifen at E6.25  
347 (Extended Data Fig. 13). In addition to displaying similar results to those observed in E5.75  
348 tamoxifen-induced *Hand1-CreERT2*; *Rosa26-tdT* embryos (Extended Data Fig. 13a-f  
349 compared to Fig. 4g-n), *Hand1* lineage-traced tdT<sup>+</sup> cells genetically-labeled at E6.25 also  
350 contributed cardiomyocytes as well as all epicardial-derived cell-types including fibroblasts  
351 and vascular support cells to E17.5 embryos (Extended Data Fig. 13g). Altogether, these  
352 data suggest that at early gastrulation stages, *Hand1* marks a progenitor population that gives

353 rise not only to cardiomyocytes within the AVC and LV prior to the time when *Hand1* is  
354 actively expressed in differentiated CMs, but also to pericardial, epicardial and  
355 extraembryonic derived mesoderm cell types. As these *Hand1*<sup>+</sup> cardiomyocyte progenitors  
356 specifically contribute to cardiomyocytes within the developing atrioventricular canal and  
357 dorsolateral regions of the LV, they likely represent a distinct subset of the reported first heart  
358 lineage cardiomyocytes<sup>2</sup>, suggesting that the FHF is not a single heart field, but is rather  
359 composed of at least two distinct heart fields, one of which, identified here, is marked by  
360 *Hand1*.

361

362 **Genetic clonal analysis reveals the multipotentiality of *Hand1*<sup>+</sup> cardiac precursor cells.**

363 Our lineage tracing results reveal that *Hand1*<sup>+</sup> progenitors in the early gastrulating embryo  
364 give rise to multiple distinct cell types in extraembryonic tissue, pericardium, endocardium,  
365 epicardium as well as the dorsal LV and AVC myocardium in the developing heart (Fig. 4,  
366 Extended Data Fig. 12, 13). These findings may reflect the presence of distinct *Hand1*<sup>+</sup>  
367 precursor cells that produce individual cell types, or multipotential *Hand1*<sup>+</sup> precursor cells  
368 which can differentiate into different combinations of cell types. To examine the lineage  
369 potential of single *Hand1*-expressing cells during early gastrulation, we crossed *Hand1*-  
370 *CreERT2* mice with the *Rosa26-Confetti* multicolor reporter mice<sup>63</sup> to genetically fate map  
371 early *Hand1*<sup>+</sup> individual clones expressing a specific fluorescent protein following low dose  
372 tamoxifen treatment at E6.75 or E7.25 (Fig. 5a). To this end, we discovered that 0.005 mg/g  
373 of tamoxifen was the minimum effective dose at E6.75 or E7.25 that reliably leads to clonal  
374 events in examined embryos (Extended Data Fig. 14a, b). This dose resulted in  
375 recombination in only 27% of embryos (n = 175/640), which was less than the expected  
376 *Hand1-CreERT2*; *Rosa26-confetti* genotype positivity rate (50%) (Extended Data Fig. 14b).  
377 Among these embryos, bi-color embryos occurred in the highest proportion followed by uni-  
378 color and tri-color embryos (Fig. 5b), and the observed frequency of each Brainbow color

379 (YFP, RFP, CFP and nGFP) was consistent with those from previous reports<sup>4</sup> (Extended Data  
380 Fig. 14c). Further examining all labeled embryos at E9.5 revealed that ~73% (242/330) of  
381 the clones were present in only the extraembryonic tissue; ~26% (86/330) were located in  
382 both extraembryonic and cardiac tissue; and two clones (~1%) contributed to only cardiac  
383 tissue (Extended Data Fig. 14d). The distribution of these clones combined together were  
384 consistent with the distribution of genetically-labeled *Hand1-CreERT2; Rosa26-tdT* cells at a  
385 similar stage (Fig. 4k, l, compared to Fig. 5c-e). Supporting the multipotentiality of early  
386 *Hand1*+ progenitors during early gastrulation, uni-color embryos, which were most likely  
387 due to a single recombination event<sup>4</sup>, exhibited clones that fluorescently-labeled both  
388 extraembryonic and cardiac tissues including the proepicardium/ST, pericardium, LV and  
389 AVC at E9.5 (Fig. 5c-e). Additional immunofluorescence studies revealed that these  
390 *Hand1*+ clones specifically contributed to not only  $\alpha$ -Actinin+ cardiomyocytes in the AVC  
391 and LV but also *Wt1*+ proepicardial and pericardial cells in the developing embryo (Fig. 5c,  
392 Extended Data Fig. 14e-h). However, consistent with the relatively few endocardial cells  
393 genetically labeled in *Hand1-CreERT2; Rosa26-tdT* embryos (Fig. 4k'', Extended Data Fig.  
394 12d'), *Hand1*+ clones were not observed in the endocardium. Finally, *Hand1*+ clones  
395 supplied  $\alpha$ -SMA+ smooth muscle cells and *Pdgfr $\beta$* + mesothelial cells to the extraembryonic  
396 mesoderm (Extended Data Fig. 14i, j).

397 To further substantiate that clones in both the yolk sac and heart derive from a single  
398 recombination event, we examined additional embryos containing bi- and tri-color clones.  
399 To ensure that these clones resulted from single recombination events, we employed a  
400 rigorous statistical analysis of the number cells in each clone. To this end, we counted the  
401 cells in each clone (an individual color) in either cardiac tissues or both extraembryonic and  
402 cardiac tissues, and modeled these cell counts with a mixture of two Gaussian distributions<sup>64</sup>:  
403 one for the cell count that would be expected for a single recombination event, and the other



404 for the cell count that would be expected for two or more recombination events (Extended  
405 Data Fig. 14m-p). Based on this model, we found that 53 out of 88 observed clones labeled  
406 at E6.75 or E7.25 corresponded to single clonal events in both cell count analyses (Extended  
407 Data Fig. 14m-p). Additional analyses of these consensus single clonal events revealed that  
408 the majority of single clones in the heart contributed to two or three distinct lineages,  
409 including various combinations of extraembryonic mesoderm, pericardium,  
410 proepicardium/ST, and AVC or LV myocardium (Extended Data Fig. 14n, p), thus  
411 supporting the multipotentiality of *Hand1*<sup>+</sup> progenitor cells.

412 To further investigate the clonal relationships among specific *Hand1*<sup>+</sup> progenitor-  
413 derived cardiac cell types and their location in later stage hearts, we examined E6.75 or E7.25  
414 tamoxifen-induced *Hand1-CreERT2*; *Rosa26-Confetti* clones at E12.5 when most cardiac  
415 structures and cell types have been determined. Only uni-color hearts were analyzed as  
416 these hearts were most likely to be derived from a single recombination event<sup>4</sup>. Consistent  
417 with the E9.5 clonal analysis (Fig. 5c), clones marking the epicardium also labeled  
418 cardiomyocytes in the AVC or LV at E12.5 (Fig. 5f-i, Extended Data Fig. 14k), thus  
419 supporting that multipotential *Hand1*<sup>+</sup> cardiac progenitor cells can give rise to both  
420 cardiomyocytes and non-cardiomyocytes. Altogether, these results reveal the existence of  
421 multipotential *Hand1* cardiac progenitors in the early ingressing mesoderm that can give rise  
422 to extraembryonic mesoderm, mesothelial lineages (epicardium and pericardium) and LV and  
423 AVC myocardium (Fig. 5j).

424

## 425 **Discussion**

426 Overall, our transcriptional and developmental interrogation of *Mesp1*-lineages at single-cell  
427 resolution has illuminated the intricacies of building complex organs/tissues derived from the  
428 mesoderm. Our single-cell transcriptomic studies reveal not only well-established but also  
429 previously unappreciated developmental sources for key cell lineages creating both intra- and

430 extra-embryonic organs/tissues. Similar to previous studies for gut endoderm<sup>65</sup>, our  
431 trajectory analysis of our developing mesoderm single cell data has uncovered a close  
432 developmental relationship between intra- and extra-embryonic derived organs/tissues  
433 including unexpectedly a distinct developmental lineage of the heart that is related to those  
434 contributing to specific extraembryonic structures. Utilizing a combination of genetic fate-  
435 mapping and clonal analyses, we not only confirm this developmental cardiac-  
436 extraembryonic tissue connection but also delineate the progenitors creating these lineages  
437 and their specific contributions to the developing heart and extraembryonic structures (Fig.  
438 5j).

439 Highlighting the complexity of organogenesis, we show how similar cell types, such as  
440 cardiomyocytes, can derive from multiple developmental origins/progenitors that have  
441 potential to contribute not only to other cell types but also to multiple organs/tissue  
442 structures. In particular, further single-cell subcluster analyses of isolated cardiomyocyte  
443 transcriptomic profiles identified at least three distinct myocardial heart lineages including a  
444 heart lineage whose progenitor shares a gene signature with extraembryonic mesodermal  
445 progenitors including *Hand1*. Trajectory analyses predicted that two of these heart lineages  
446 derive from a common embryonic source prior to E7.25, with marker expression at E8.25  
447 suggesting their correspondence to first and second heart lineages<sup>1</sup>, whereas the *Hand1*+  
448 extraembryonic-related heart lineage originates from a distinct developmental source that  
449 downregulates *Mesp1* prior to E7.25 and gives rise to myocardial lineages. Further  
450 expression analyses revealed that at early gastrula stages, *Hand1*+ progenitors reside at the  
451 intra-/extra-embryonic boundary, with genetic fate mapping demonstrating that *Hand1*+  
452 progenitors specifically contribute to myocardial cells localized to the dorsal regions of the  
453 LV and AVC at E12.5. As myocardial lineages contributing to the LV have previously been  
454 defined as first heart lineages deriving from the FHF<sup>2</sup>, our results support that this *Hand1*+

455 cardiac progenitor field represents a distinct subset of the FHF, thus revealing that the FHF  
456 consists of at least two distinct progenitor fields. Notably, these *Hand1*+ FHF subpopulation  
457 findings are consistent with a mathematically-inferred myocardial lineage model from  
458 previous retrospective clonal analyses<sup>2-4</sup>, thus further supporting our findings.

459 One limitation for understanding the full lineage potential of the FHF or SHF from  
460 retrospective clonal studies<sup>2</sup>, is that, because of experimental design, only myocardial clones  
461 can be studied. However, when *Isl1* was identified as a marker of the SHF, studies with  
462 *Isl1-Cre* or inducible *Isl1-CreERT2* revealed that the SHF produces both myocardial lineages  
463 as well as multiple other cardiac lineages<sup>5,8,66,67</sup>. Here, utilizing *Hand1-CreERT2* in concert  
464 with a confetti clonal indicator<sup>63</sup>, we uncovered an unsuspected multipotentiality of the  
465 *Hand1* FHF in which cells within the *Hand1* FHF can give rise not only to a specific subset  
466 of myocardial lineages within the first heart lineage, but also to extraembryonic mesoderm,  
467 septum transversum/epicardial, and pericardial cells. Thus, our results reveal that  
468 myocardial cells of the AVC and LV (particularly dorsal regions) and extraembryonic  
469 mesodermal and serosal mesothelial cells have a closer lineage relationship than previously  
470 expected, while also addressing the elusive embryonic origins of the  
471 proepicardium/epicardium, which contributes essential vascular support cells and cardiac  
472 fibroblasts to the heart.

473 The existence of a progenitor population that gives rise to cells both within  
474 extraembryonic and intraembryonic tissues provides a further example of blurred boundaries  
475 between extraembryonic and intraembryonic tissues, as seen by migration of extraembryonic  
476 hematopoietic progenitors to intraembryonic sites<sup>68</sup>, and intercalation of extraembryonic and  
477 intraembryonic endoderm during gut formation<sup>69</sup>. Additionally, these findings may also  
478 account for previous observations that, under certain *in vitro* conditions, epicardial  
479 progenitors can adopt cardiomyocyte cell fates<sup>70</sup>, and that loss of an

480 endothelial/hematopoietic transcription factor, *Scl*, can result in transdifferentiation of yolk  
481 sac hematopoietic cells to beating cardiomyocytes<sup>71</sup>. The close developmental relationship  
482 between mesothelial lineages of both extraembryonic and intraembryonic tissues, and  
483 *Hand1*+ FHF-derived cardiac lineages, coupled to the high plasticity of mesothelial cells<sup>72-74</sup>,  
484 suggests the possibility of transforming extraembryonic and serosal mesothelial tissues into  
485 cardiomyocytes to treat heart failure in the future.

486       As *Hand1* marks a subset of the FHF in the early gastrula embryo, and these progenitors  
487 have multipotentiality, the specific role of *Hand1* in early specification of FHF progenitors  
488 will be of great interest to examine in future studies. Global knockout of *Hand1* results in  
489 embryonic lethality at approximately E8.5, and mutant embryos exhibit placental, yolk sac  
490 and heart defects<sup>45,46</sup>. As placenta and yolk sac defects can secondarily impact the heart,  
491 direct requirements for *Hand1* in early heart progenitors remains unclear. Although some  
492 experiments, including cardiac-specific conditional knockout and tetraploid rescue  
493 studies<sup>45,46</sup>, confirmed heart defects in *Hand1* mutant embryos, these studies could not rule  
494 out requirements for *Hand1* in differentiated cardiomyocytes, rather than undifferentiated  
495 progenitors. However, our findings suggest that these heart defects may be due to  
496 abnormalities in undifferentiated progenitors which can give rise to cardiomyocytes.  
497 Because these progenitors can also contribute to extraembryonic tissue, they also raise the  
498 possibility that congenital heart diseases thought to be caused by placental anomalies<sup>75</sup> may  
499 be due to perturbations of complex interplays between genetic pathways shared by  
500 extraembryonic and cardiac lineages.

501       Overall, our studies reveal that there are distinct subsets of the FHF that contribute to  
502 specific corresponding subpopulations of first myocardial lineages<sup>2</sup>, and that *Hand1*-FHF  
503 progenitors are multipotential, giving rise to multiple cell lineages, including cardiovascular  
504 lineages within the heart and extraembryonic cell types within the yolk sac. The

505 cardiovascular multipotentiality of FHF progenitors, as previously seen for the SHF, may  
506 further reflect the evolution of the cardiovascular system, thus highlighting the overall  
507 complexity of how diverse cell types are created to build and organize functional  
508 organs/tissues.

## 509 Main References

510

- 511 1 Meilhac, S. M. & Buckingham, M. E. The deployment of cell lineages that form the  
512 mammalian heart. *Nature reviews. Cardiology* **15**, 705-724, doi:10.1038/s41569-018-  
513 0086-9 (2018).
- 514 2 Meilhac, S. M., Esner, M., Kelly, R. G., Nicolas, J. F. & Buckingham, M. E. The clonal  
515 origin of myocardial cells in different regions of the embryonic mouse heart.  
516 *Developmental cell* **6**, 685-698, doi:10.1016/s1534-5807(04)00133-9 (2004).
- 517 3 Devine, W. P., Wythe, J. D., George, M., Koshiba-Takeuchi, K. & Bruneau, B. G. Early  
518 patterning and specification of cardiac progenitors in gastrulating mesoderm. *eLife* **3**,  
519 doi:10.7554/eLife.03848 (2014).
- 520 4 Lescroart, F. *et al.* Early lineage restriction in temporally distinct populations of Mesp1  
521 progenitors during mammalian heart development. *Nature cell biology* **16**, 829-840,  
522 doi:10.1038/ncb3024 (2014).
- 523 5 Cai, C. L. *et al.* Isl1 identifies a cardiac progenitor population that proliferates prior to  
524 differentiation and contributes a majority of cells to the heart. *Developmental cell* **5**,  
525 877-889, doi:10.1016/s1534-5807(03)00363-0 (2003).
- 526 6 Kelly, R. G., Brown, N. A. & Buckingham, M. E. The arterial pole of the mouse heart  
527 forms from Fgf10-expressing cells in pharyngeal mesoderm. *Developmental cell* **1**,  
528 435-440, doi:10.1016/s1534-5807(01)00040-5 (2001).
- 529 7 Prall, O. W. *et al.* An Nkx2-5/Bmp2/Smad1 negative feedback loop controls heart  
530 progenitor specification and proliferation. *Cell* **128**, 947-959,  
531 doi:10.1016/j.cell.2007.01.042 (2007).
- 532 8 Bu, L. *et al.* Human ISL1 heart progenitors generate diverse multipotent cardiovascular  
533 cell lineages. *Nature* **460**, 113-117, doi:10.1038/nature08191 (2009).
- 534 9 Lescroart, F. *et al.* Clonal analysis reveals common lineage relationships between head  
535 muscles and second heart field derivatives in the mouse embryo. *Development*  
536 (*Cambridge, England*) **137**, 3269-3279, doi:10.1242/dev.050674 (2010).
- 537 10 Lescroart, F. *et al.* Clonal analysis reveals a common origin between nonsomite-derived  
538 neck muscles and heart myocardium. *Proceedings of the National Academy of Sciences*  
539 *of the United States of America* **112**, 1446-1451, doi:10.1073/pnas.1424538112 (2015).
- 540 11 Diogo, R. *et al.* A new heart for a new head in vertebrate cardiopharyngeal evolution.  
541 *Nature* **520**, 466-473, doi:10.1038/nature14435 (2015).
- 542 12 Liang, X. *et al.* HCN4 dynamically marks the first heart field and conduction system  
543 precursors. *Circulation research* **113**, 399-407, doi:10.1161/circresaha.113.301588  
544 (2013).
- 545 13 Später, D. *et al.* A HCN4<sup>+</sup> cardiomyogenic progenitor derived from the first heart field  
546 and human pluripotent stem cells. *Nature cell biology* **15**, 1098-1106,  
547 doi:10.1038/ncb2824 (2013).
- 548 14 Komiyama, M., Ito, K. & Shimada, Y. Origin and development of the epicardium in the  
549 mouse embryo. *Anatomy and embryology* **176**, 183-189, doi:10.1007/bf00310051  
550 (1987).
- 551 15 Mikawa, T. & Gourdie, R. G. Pericardial mesoderm generates a population of coronary  
552 smooth muscle cells migrating into the heart along with ingrowth of the epicardial organ.  
553 *Developmental biology* **174**, 221-232, doi:10.1006/dbio.1996.0068 (1996).
- 554 16 Gittenberger-de Groot, A. C., Vrancken Peeters, M. P., Mentink, M. M., Gourdie, R. G.  
555 & Poelmann, R. E. Epicardium-derived cells contribute a novel population to the  
556 myocardial wall and the atrioventricular cushions. *Circulation research* **82**, 1043-1052,  
557 doi:10.1161/01.res.82.10.1043 (1998).

- 558 17 Grieskamp, T., Rudat, C., Lüdtke, T. H., Norden, J. & Kispert, A. Notch signaling  
559 regulates smooth muscle differentiation of epicardium-derived cells. *Circulation*  
560 *research* **108**, 813-823, doi:10.1161/circresaha.110.228809 (2011).
- 561 18 Maya-Ramos, L., Cleland, J., Bressan, M. & Mikawa, T. Induction of the  
562 Proepicardium. *Journal of developmental biology* **1**, 82-91, doi:10.3390/jdb1020082  
563 (2013).
- 564 19 Saga, Y. *et al.* MesP1 is expressed in the heart precursor cells and required for the  
565 formation of a single heart tube. *Development (Cambridge, England)* **126**, 3437-3447  
566 (1999).
- 567 20 Madisen, L. *et al.* A robust and high-throughput Cre reporting and characterization  
568 system for the whole mouse brain. *Nature neuroscience* **13**, 133-140,  
569 doi:10.1038/nn.2467 (2010).
- 570 21 Oginuma, M., Hirata, T. & Saga, Y. Identification of presomitic mesoderm (PSM)-  
571 specific Mesp1 enhancer and generation of a PSM-specific Mesp1/Mesp2-null mouse  
572 using BAC-based rescue technology. *Mechanisms of development* **125**, 432-440,  
573 doi:10.1016/j.mod.2008.01.010 (2008).
- 574 22 Yoshida, T., Vivatbutstiri, P., Morriss-Kay, G., Saga, Y. & Iseki, S. Cell lineage in  
575 mammalian craniofacial mesenchyme. *Mechanisms of development* **125**, 797-808,  
576 doi:10.1016/j.mod.2008.06.007 (2008).
- 577 23 Harel, I. *et al.* Distinct origins and genetic programs of head muscle satellite cells.  
578 *Developmental cell* **16**, 822-832, doi:10.1016/j.devcel.2009.05.007 (2009).
- 579 24 Chan, S. S. *et al.* Mesp1 patterns mesoderm into cardiac, hematopoietic, or skeletal  
580 myogenic progenitors in a context-dependent manner. *Cell stem cell* **12**, 587-601,  
581 doi:10.1016/j.stem.2013.03.004 (2013).
- 582 25 Butler, A., Hoffman, P., Smibert, P., Papalexi, E. & Satija, R. Integrating single-cell  
583 transcriptomic data across different conditions, technologies, and species. *Nature*  
584 *biotechnology* **36**, 411-420, doi:10.1038/nbt.4096 (2018).
- 585 26 Scialdone, A. *et al.* Resolving early mesoderm diversification through single-cell  
586 expression profiling. *Nature* **535**, 289-293, doi:10.1038/nature18633 (2016).
- 587 27 Pijuan-Sala, B. *et al.* A single-cell molecular map of mouse gastrulation and early  
588 organogenesis. *Nature* **566**, 490-495, doi:10.1038/s41586-019-0933-9 (2019).
- 589 28 Farrell, J. A. *et al.* Single-cell reconstruction of developmental trajectories during  
590 zebrafish embryogenesis. *Science (New York, N.Y.)* **360**, doi:10.1126/science.aar3131  
591 (2018).
- 592 29 Ueno, H. & Weissman, I. L. Clonal analysis of mouse development reveals a polyclonal  
593 origin for yolk sac blood islands. *Developmental cell* **11**, 519-533,  
594 doi:10.1016/j.devcel.2006.08.001 (2006).
- 595 30 Tam, P. P. The allocation of cells in the presomitic mesoderm during somite  
596 segmentation in the mouse embryo. *Development (Cambridge, England)* **103**, 379-390  
597 (1988).
- 598 31 Gouti, M. *et al.* A Gene Regulatory Network Balances Neural and Mesoderm  
599 Specification during Vertebrate Trunk Development. *Developmental cell* **41**, 243-  
600 261.e247, doi:10.1016/j.devcel.2017.04.002 (2017).
- 601 32 Harel, I. *et al.* Pharyngeal mesoderm regulatory network controls cardiac and head  
602 muscle morphogenesis. *Proceedings of the National Academy of Sciences of the United*  
603 *States of America* **109**, 18839-18844, doi:10.1073/pnas.1208690109 (2012).
- 604 33 Bao, Z. Z., Bruneau, B. G., Seidman, J. G., Seidman, C. E. & Cepko, C. L. Regulation  
605 of chamber-specific gene expression in the developing heart by Irx4. *Science (New York,*  
606 *N.Y.)* **283**, 1161-1164, doi:10.1126/science.283.5405.1161 (1999).
- 607 34 Bruneau, B. G. *et al.* Chamber-specific cardiac expression of Tbx5 and heart defects in

- 608 Holt-Oram syndrome. *Developmental biology* **211**, 100-108,  
609 doi:10.1006/dbio.1999.9298 (1999).
- 610 35 van den Berg, G. *et al.* A caudal proliferating growth center contributes to both poles of  
611 the forming heart tube. *Circulation research* **104**, 179-188,  
612 doi:10.1161/circresaha.108.185843 (2009).
- 613 36 Barnes, R. M. *et al.* MEF2C regulates outflow tract alignment and transcriptional  
614 control of *Tdglf1*. *Development (Cambridge, England)* **143**, 774-779,  
615 doi:10.1242/dev.126383 (2016).
- 616 37 Rudat, C. *et al.* *Upk3b* is dispensable for development and integrity of urothelium and  
617 mesothelium. *PloS one* **9**, e112112, doi:10.1371/journal.pone.0112112 (2014).
- 618 38 Facucho-Oliveira, J., Bento, M. & Belo, J. A. *Ccbe1* expression marks the cardiac and  
619 lymphatic progenitor lineages during early stages of mouse development. *The*  
620 *International journal of developmental biology* **55**, 1007-1014,  
621 doi:10.1387/ijdb.113394jf (2011).
- 622 39 Fujii, M. *et al.* *Sfrp5* identifies murine cardiac progenitors for all myocardial structures  
623 except for the right ventricle. *Nature communications* **8**, 14664,  
624 doi:10.1038/ncomms14664 (2017).
- 625 40 Saito, Y., Kojima, T. & Takahashi, N. *Mab2112* is essential for embryonic heart and  
626 liver development. *PloS one* **7**, e32991, doi:10.1371/journal.pone.0032991 (2012).
- 627 41 Kraus, F., Haenig, B. & Kispert, A. Cloning and expression analysis of the mouse T-  
628 box gene *Tbx18*. *Mechanisms of development* **100**, 83-86, doi:10.1016/s0925-  
629 4773(00)00494-9 (2001).
- 630 42 de Soysa, T. Y. *et al.* Single-cell analysis of cardiogenesis reveals basis for organ-level  
631 developmental defects. *Nature* **572**, 120-124, doi:10.1038/s41586-019-1414-x (2019).
- 632 43 Lupu, I. E., Redpath, A. N. & Smart, N. Spatiotemporal Analysis Reveals Overlap of  
633 Key Proepicardial Markers in the Developing Murine Heart. *Stem cell reports* **14**, 770-  
634 787, doi:10.1016/j.stemcr.2020.04.002 (2020).
- 635 44 Di Bella, D. J. *et al.* Molecular Logic of Cellular Diversification in the Mammalian  
636 Cerebral Cortex. *bioRxiv*, 2020.2007.2002.185439, doi:10.1101/2020.07.02.185439  
637 (2020).
- 638 45 Riley, P., Anson-Cartwright, L. & Cross, J. C. The *Hand1* bHLH transcription factor is  
639 essential for placentation and cardiac morphogenesis. *Nature genetics* **18**, 271-275,  
640 doi:10.1038/ng0398-271 (1998).
- 641 46 Firulli, A. B., McFadden, D. G., Lin, Q., Srivastava, D. & Olson, E. N. Heart and extra-  
642 embryonic mesodermal defects in mouse embryos lacking the bHLH transcription  
643 factor *Hand1*. *Nature genetics* **18**, 266-270, doi:10.1038/ng0398-266 (1998).
- 644 47 Srivastava, D., Cserjesi, P. & Olson, E. N. A subclass of bHLH proteins required for  
645 cardiac morphogenesis. *Science (New York, N.Y.)* **270**, 1995-1999,  
646 doi:10.1126/science.270.5244.1995 (1995).
- 647 48 Merscher, S. *et al.* *TBX1* is responsible for cardiovascular defects in velo-cardio-  
648 facial/DiGeorge syndrome. *Cell* **104**, 619-629, doi:10.1016/s0092-8674(01)00247-1  
649 (2001).
- 650 49 Zhang, Z., Huynh, T. & Baldini, A. Mesodermal expression of *Tbx1* is necessary and  
651 sufficient for pharyngeal arch and cardiac outflow tract development. *Development*  
652 *(Cambridge, England)* **133**, 3587-3595, doi:10.1242/dev.02539 (2006).
- 653 50 Lin, Q., Schwarz, J., Bucana, C. & Olson, E. N. Control of mouse cardiac  
654 morphogenesis and myogenesis by transcription factor MEF2C. *Science (New York,*  
655 *N.Y.)* **276**, 1404-1407, doi:10.1126/science.276.5317.1404 (1997).
- 656 51 Jongbloed, M. R. *et al.* Expression of *Id2* in the second heart field and cardiac defects  
657 in *Id2* knock-out mice. *Developmental dynamics : an official publication of the*



- 658 *American Association of Anatomists* **240**, 2561-2577, doi:10.1002/dvdy.22762 (2011).
- 659 52 Moskowitz, I. P. *et al.* A molecular pathway including Id2, Tbx5, and Nkx2-5 required  
660 for cardiac conduction system development. *Cell* **129**, 1365-1376,  
661 doi:10.1016/j.cell.2007.04.036 (2007).
- 662 53 Fraidenraich, D. *et al.* Rescue of cardiac defects in id knockout embryos by injection  
663 of embryonic stem cells. *Science (New York, N.Y.)* **306**, 247-252,  
664 doi:10.1126/science.1102612 (2004).
- 665 54 Bamforth, S. D. *et al.* Cited2 controls left-right patterning and heart development  
666 through a Nodal-Pitx2c pathway. *Nature genetics* **36**, 1189-1196, doi:10.1038/ng1446  
667 (2004).
- 668 55 Barnes, R. M. *et al.* Hand2 loss-of-function in Hand1-expressing cells reveals distinct  
669 roles in epicardial and coronary vessel development. *Circulation research* **108**, 940-  
670 949, doi:10.1161/circresaha.110.233171 (2011).
- 671 56 Biben, C. & Harvey, R. P. Homeodomain factor Nkx2-5 controls left/right asymmetric  
672 expression of bHLH gene eHand during murine heart development. *Genes &*  
673 *development* **11**, 1357-1369, doi:10.1101/gad.11.11.1357 (1997).
- 674 57 Thomas, T., Yamagishi, H., Overbeek, P. A., Olson, E. N. & Srivastava, D. The bHLH  
675 factors, dHAND and eHAND, specify pulmonary and systemic cardiac ventricles  
676 independent of left-right sidedness. *Developmental biology* **196**, 228-236,  
677 doi:10.1006/dbio.1998.8849 (1998).
- 678 58 Robinson, S. P., Langan-Fahey, S. M., Johnson, D. A. & Jordan, V. C. Metabolites,  
679 pharmacodynamics, and pharmacokinetics of tamoxifen in rats and mice compared to  
680 the breast cancer patient. *Drug metabolism and disposition: the biological fate of*  
681 *chemicals* **19**, 36-43 (1991).
- 682 59 Wilson, C. H. *et al.* The kinetics of ER fusion protein activation in vivo. *Oncogene* **33**,  
683 4877-4880, doi:10.1038/onc.2014.78 (2014).
- 684 60 Aanhaanen, W. T. *et al.* The Tbx2<sup>+</sup> primary myocardium of the atrioventricular canal  
685 forms the atrioventricular node and the base of the left ventricle. *Circulation research*  
686 **104**, 1267-1274, doi:10.1161/circresaha.108.192450 (2009).
- 687 61 Li, G. *et al.* Single cell expression analysis reveals anatomical and cell cycle-dependent  
688 transcriptional shifts during heart development. *Development (Cambridge, England)*  
689 **146**, doi:10.1242/dev.173476 (2019).
- 690 62 Harrelson, Z. *et al.* Tbx2 is essential for patterning the atrioventricular canal and for  
691 morphogenesis of the outflow tract during heart development. *Development*  
692 *(Cambridge, England)* **131**, 5041-5052, doi:10.1242/dev.01378 (2004).
- 693 63 Snippert, H. J. *et al.* Intestinal crypt homeostasis results from neutral competition  
694 between symmetrically dividing Lgr5 stem cells. *Cell* **143**, 134-144,  
695 doi:10.1016/j.cell.2010.09.016 (2010).
- 696 64 Benaglia, T., Chauveau, D., Hunter, D., R. & Young, D., S. mixtools: An R Package for  
697 Analyzing Finite Mixture Models. *Journal of Statistical Software* **32**, 1-29 (2009).
- 698 65 Nowotschin, S. *et al.* The emergent landscape of the mouse gut endoderm at single-cell  
699 resolution. *Nature* **569**, 361-367, doi:10.1038/s41586-019-1127-1 (2019).
- 700 66 Moretti, A. *et al.* Multipotent embryonic isl1<sup>+</sup> progenitor cells lead to cardiac, smooth  
701 muscle, and endothelial cell diversification. *Cell* **127**, 1151-1165,  
702 doi:10.1016/j.cell.2006.10.029 (2006).
- 703 67 Sun, Y. *et al.* Islet 1 is expressed in distinct cardiovascular lineages, including  
704 pacemaker and coronary vascular cells. *Developmental biology* **304**, 286-296,  
705 doi:10.1016/j.ydbio.2006.12.048 (2007).
- 706 68 Orkin, S. H. & Zon, L. I. Hematopoiesis: an evolving paradigm for stem cell biology.  
707 *Cell* **132**, 631-644, doi:10.1016/j.cell.2008.01.025 (2008).

- 708 69 Kwon, G. S., Viotti, M. & Hadjantonakis, A. K. The endoderm of the mouse embryo  
709 arises by dynamic widespread intercalation of embryonic and extraembryonic lineages.  
710 *Developmental cell* **15**, 509-520, doi:10.1016/j.devcel.2008.07.017 (2008).
- 711 70 Kruithof, B. P. *et al.* BMP and FGF regulate the differentiation of multipotential  
712 pericardial mesoderm into the myocardial or epicardial lineage. *Developmental biology*  
713 **295**, 507-522, doi:10.1016/j.ydbio.2006.03.033 (2006).
- 714 71 Van Handel, B. *et al.* Scl represses cardiomyogenesis in prospective hemogenic  
715 endothelium and endocardium. *Cell* **150**, 590-605, doi:10.1016/j.cell.2012.06.026  
716 (2012).
- 717 72 Zhou, B. *et al.* Adult mouse epicardium modulates myocardial injury by secreting  
718 paracrine factors. *The Journal of clinical investigation* **121**, 1894-1904,  
719 doi:10.1172/jci45529 (2011).
- 720 73 Smart, N. *et al.* De novo cardiomyocytes from within the activated adult heart after  
721 injury. *Nature* **474**, 640-644, doi:10.1038/nature10188 (2011).
- 722 74 Zangi, L. *et al.* Insulin-Like Growth Factor 1 Receptor-Dependent Pathway Drives  
723 Epicardial Adipose Tissue Formation After Myocardial Injury. *Circulation* **135**, 59-72,  
724 doi:10.1161/circulationaha.116.022064 (2017).
- 725 75 Matthiesen, N. B. *et al.* Congenital Heart Defects and Indices of Placental and Fetal  
726 Growth in a Nationwide Study of 924 422 Liveborn Infants. *Circulation* **134**, 1546-  
727 1556, doi:10.1161/circulationaha.116.021793 (2016).

728 **Acknowledgements**

729 We thank Jianlin Zhang and Mi Tran for mouse care, and Evans and Chi lab members for  
730 comments on the manuscript. Various experiments were conducted with the assistance,  
731 expertise, and support of the following University of California San Diego (UCSD) core  
732 facilities including the: Institute for Genomic Medicine Core, Mouse Transgenic Core and  
733 Histology and Immunohistochemistry Core. This work was supported in part by grants from  
734 the NIH to S.M.E., N.C.C.; CIRM to T. I., N.C.C.; AHA to J.B.

735

736 **Author Contributions**

737 Q.Z., D.C., P.C., S.M.E., J.B. and N.C.C. conceived the project and the design of the  
738 experimental strategy. Q.Z., J.B. carried out experimental studies including *in situ*  
739 hybridization study, lineage tracing and clonal analysis. D.C. performed bioinformatic  
740 analysis. J.B. carried out scRNA-seq experimental studies. F.Z. generated *Hand1-*  
741 *CreERT2* knock in mice line. T. I provided bioinformatics analysis guidance. Q.Z., D.C.,  
742 S.M.E., J.B. and N.C.C. prepared the manuscript.

743

744 **Competing interests**

745 The authors declare no competing interests.

746

747 **Reprints and permission information** is available at [www.nature.com/reprints](http://www.nature.com/reprints).

748

749 **Correspondence and requests for materials** should be addressed to N.C.C.

750 (nchi@health.ucsd.edu), J. B. (josh@olemiss.edu) and S.M.E. (syevans@health.ucsd.edu).

## Figure 1

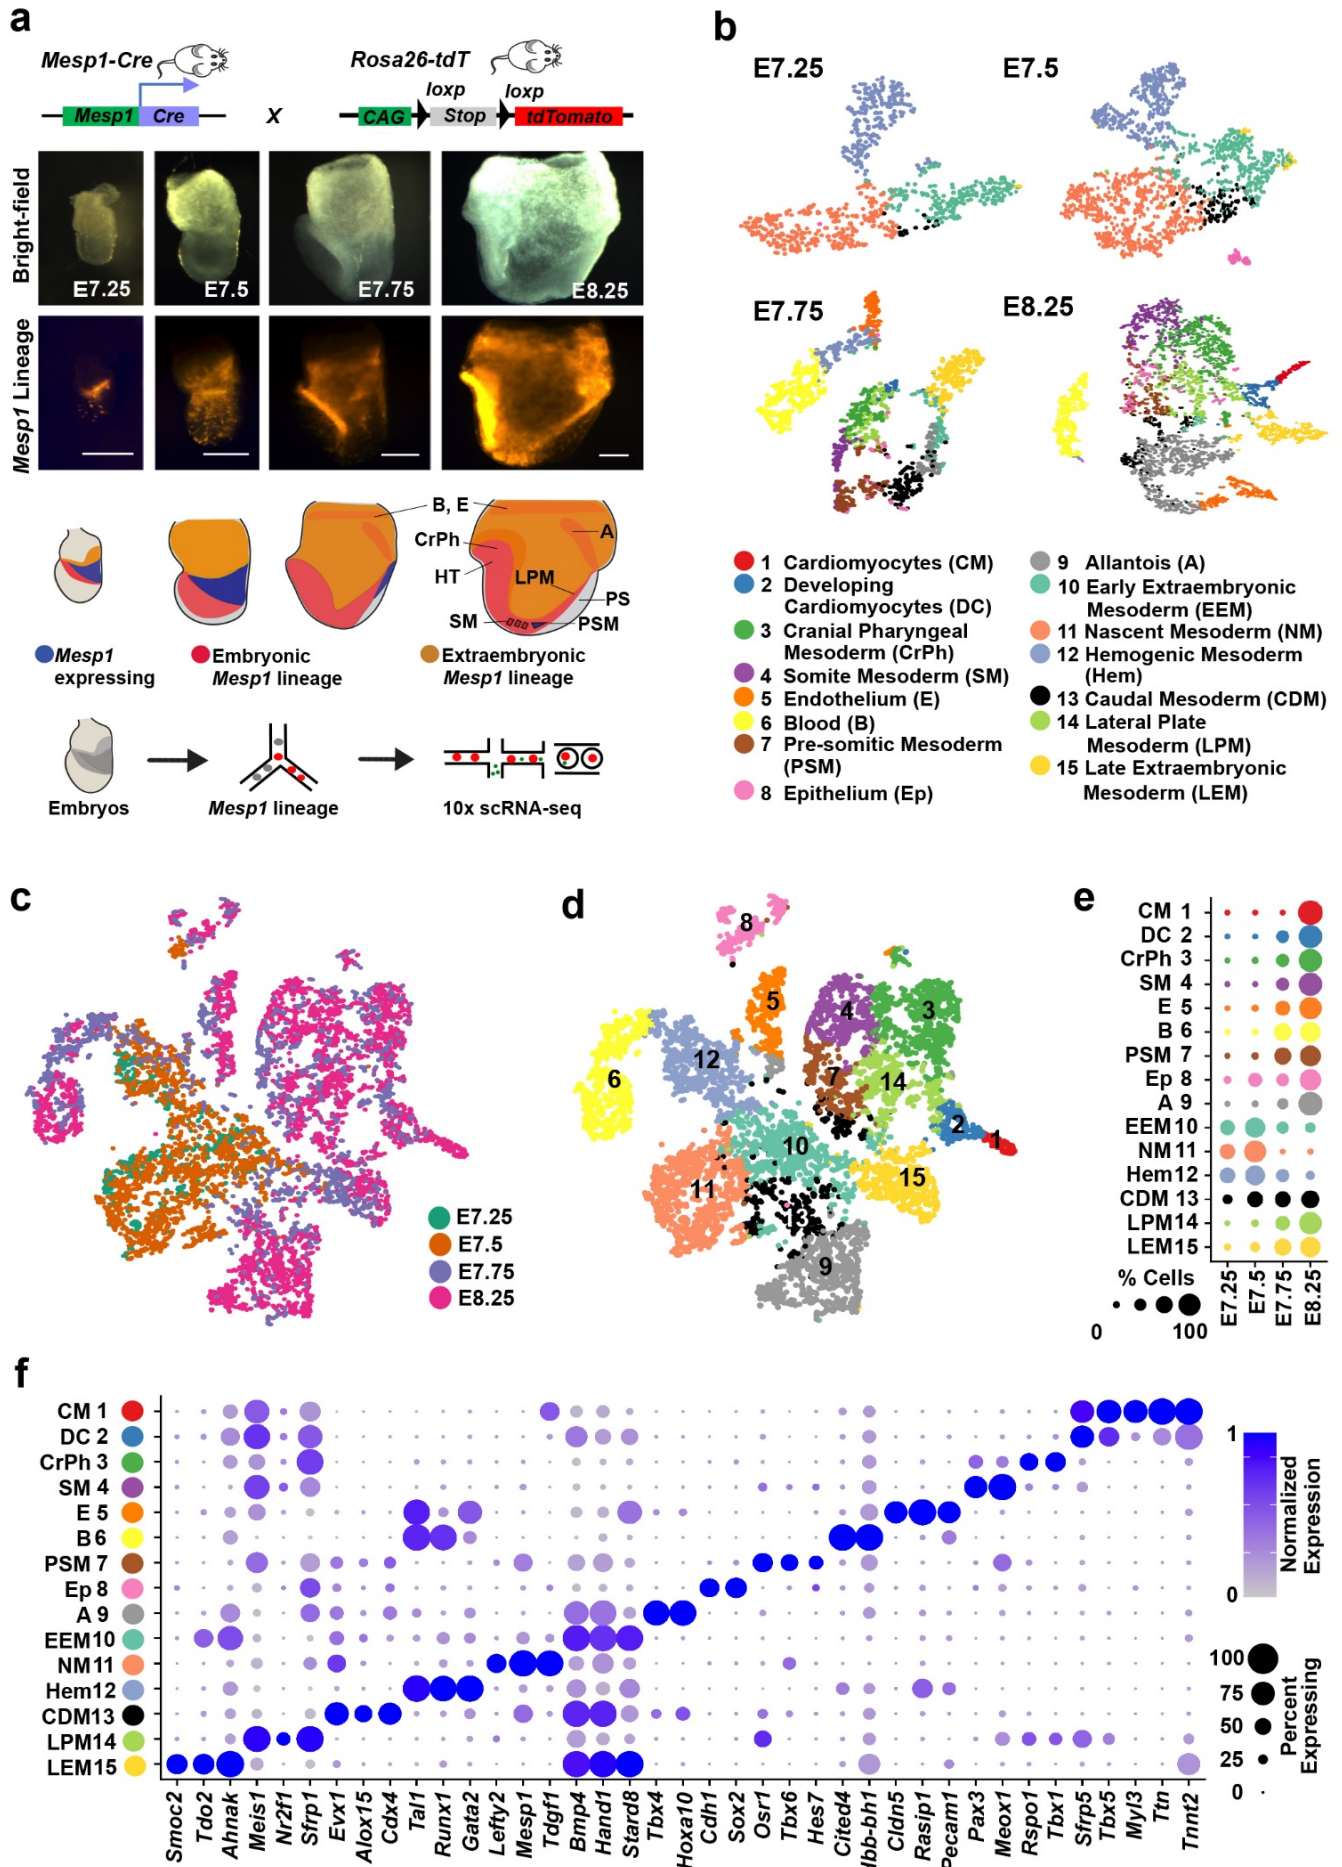

752 **Figure 1. *Mesp1*-Cre single-cell maps reveal diverse cell types participating in early**  
753 **mouse mesoderm development.** **a**, *Mesp1*-Cre scRNA-seq experimental design. *Mesp1*-  
754 *Cre*; *Rosa26-tdT* embryos were harvested for scRNA-seq at E7.25 (no bud stage); E7.5 (early  
755 bud stage); E7.75 (early head fold stage); and E8.25 (somite stage) as shown in representative  
756 bright-field and *Mesp1*-Cre; tdT+ (*Mesp1* lineage) micrographs. Illustration below these  
757 micrographs shows tissues genetically labeled by *Mesp1*-Cre in embryos, and workflow for  
758 capturing these labeled single cells for RNA sequencing. Scale bars, 150  $\mu$ m. **b**, scRNA-  
759 seq data is displayed by tSNE plots at each developmental stage. Cells are colored  
760 according to their cell identities in **d**, **e**, **f**. **c**, **d**, tSNE plot of scRNA-seq data across all  
761 examined stages displays individual cells (single dots) by (c) developmental stages or (d) cell  
762 types. **e**, Dot plot shows distribution of each cell type across different embryonic stages. **f**,  
763 Dot plot of key marker genes identifies each cell cluster. A, Allantois; B, Blood; CDM,  
764 Caudal Mesoderm; CrPh, Cranial-pharyngeal mesoderm; CM, Cardiomyocytes; DC,  
765 Developing Cardiomyocytes; E, Endothelium; Ep, Epithelium; EEM, Early Extraembryonic  
766 Mesoderm; Hem, Hemogenic Mesoderm; HT, Heart tube; LEM, Late Extraembryonic  
767 Mesoderm; LPM, Lateral plate mesoderm; NM, Nascent Mesoderm; PSM, Pre-somitic  
768 mesoderm; PS, Primitive streak, SM, Somite mesoderm.

Figure 2

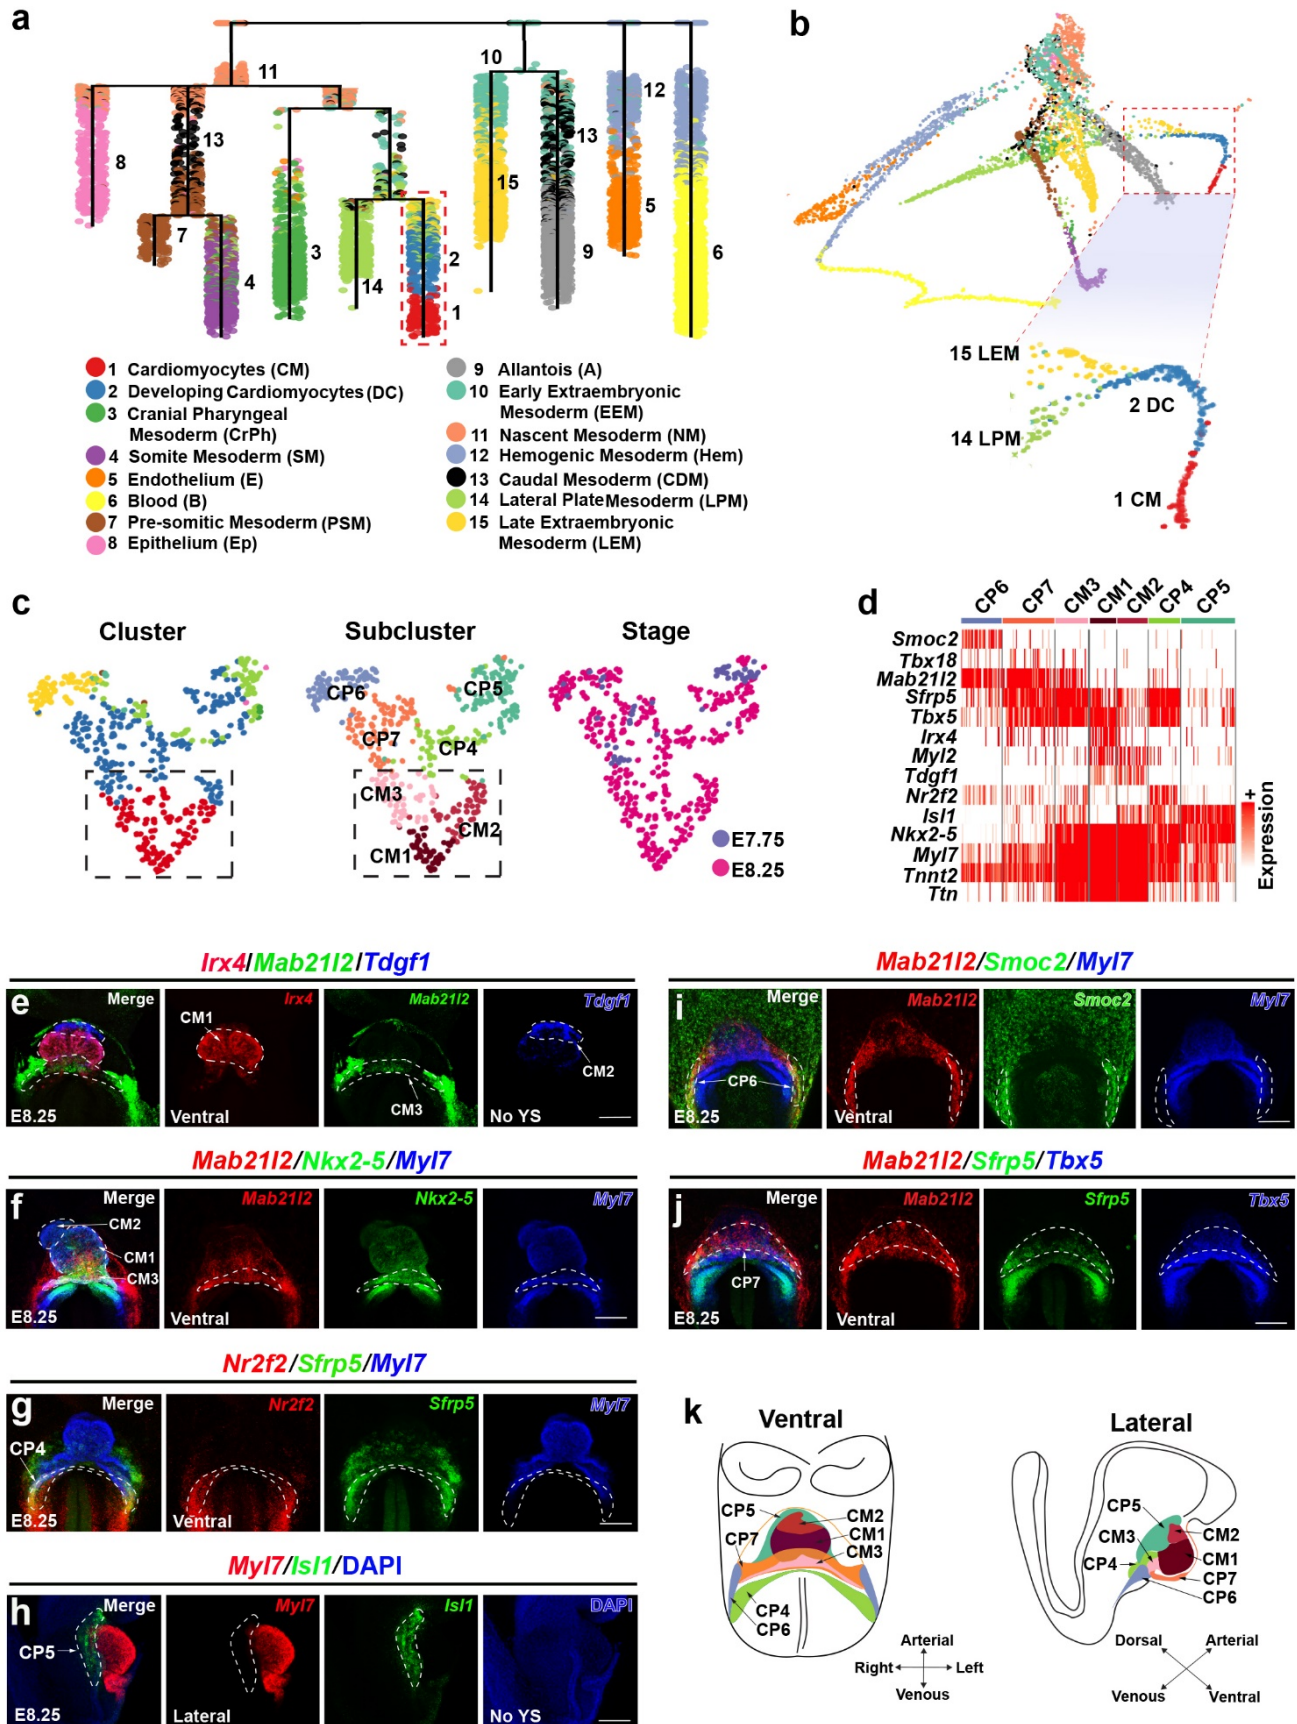

770 **Figure 2. *Mesp1*-Cre scRNA-seq trajectory analysis reconstructs developmental cell**  
771 **lineage trees during mesoderm/heart organogenesis. a, b,** URD inferred lineage tree, as  
772 displayed by **(a)** dendrogram or **(b)** force-directed layout, reveals the developmental history of  
773 *Mesp1* mesoderm-derived organs. Red dashed box in **a, b** outlines cardiomyocyte branch,  
774 which is further magnified in **b**. The magnified cardiomyocyte branch shows that  
775 cardiomyocytes may derive from both late extraembryonic mesoderm (LEM) and lateral plate  
776 mesoderm (LPM) progenitor cells. **c,** tSNE layout of cells from only the cardiomyocyte  
777 branch (boxed area in **a, b**) reveals seven cardiac subclusters composing the cardiomyocyte  
778 branch including three distinct cardiomyocyte populations (CM1-3) and four specific cardiac  
779 progenitor cell-types (CP4-7). **d,** Heatmap of differentially expressed marker genes  
780 identifies each cardiac subcluster. **e-j,** RNAscope *in situ* hybridization (ISH) of  
781 representative marker genes for each cardiac subcluster cell population shows their location  
782 in E8.25 embryos. n = 3 per panel. Scale bars, 100  $\mu$ m. The extraembryonic tissue and  
783 part of the pericardium tissue were removed in **e, h** to show the underlying heart tube. **k,**  
784 Diagram illustrates the seven different cardiac subclusters in an E8.25 embryo.

Figure 3

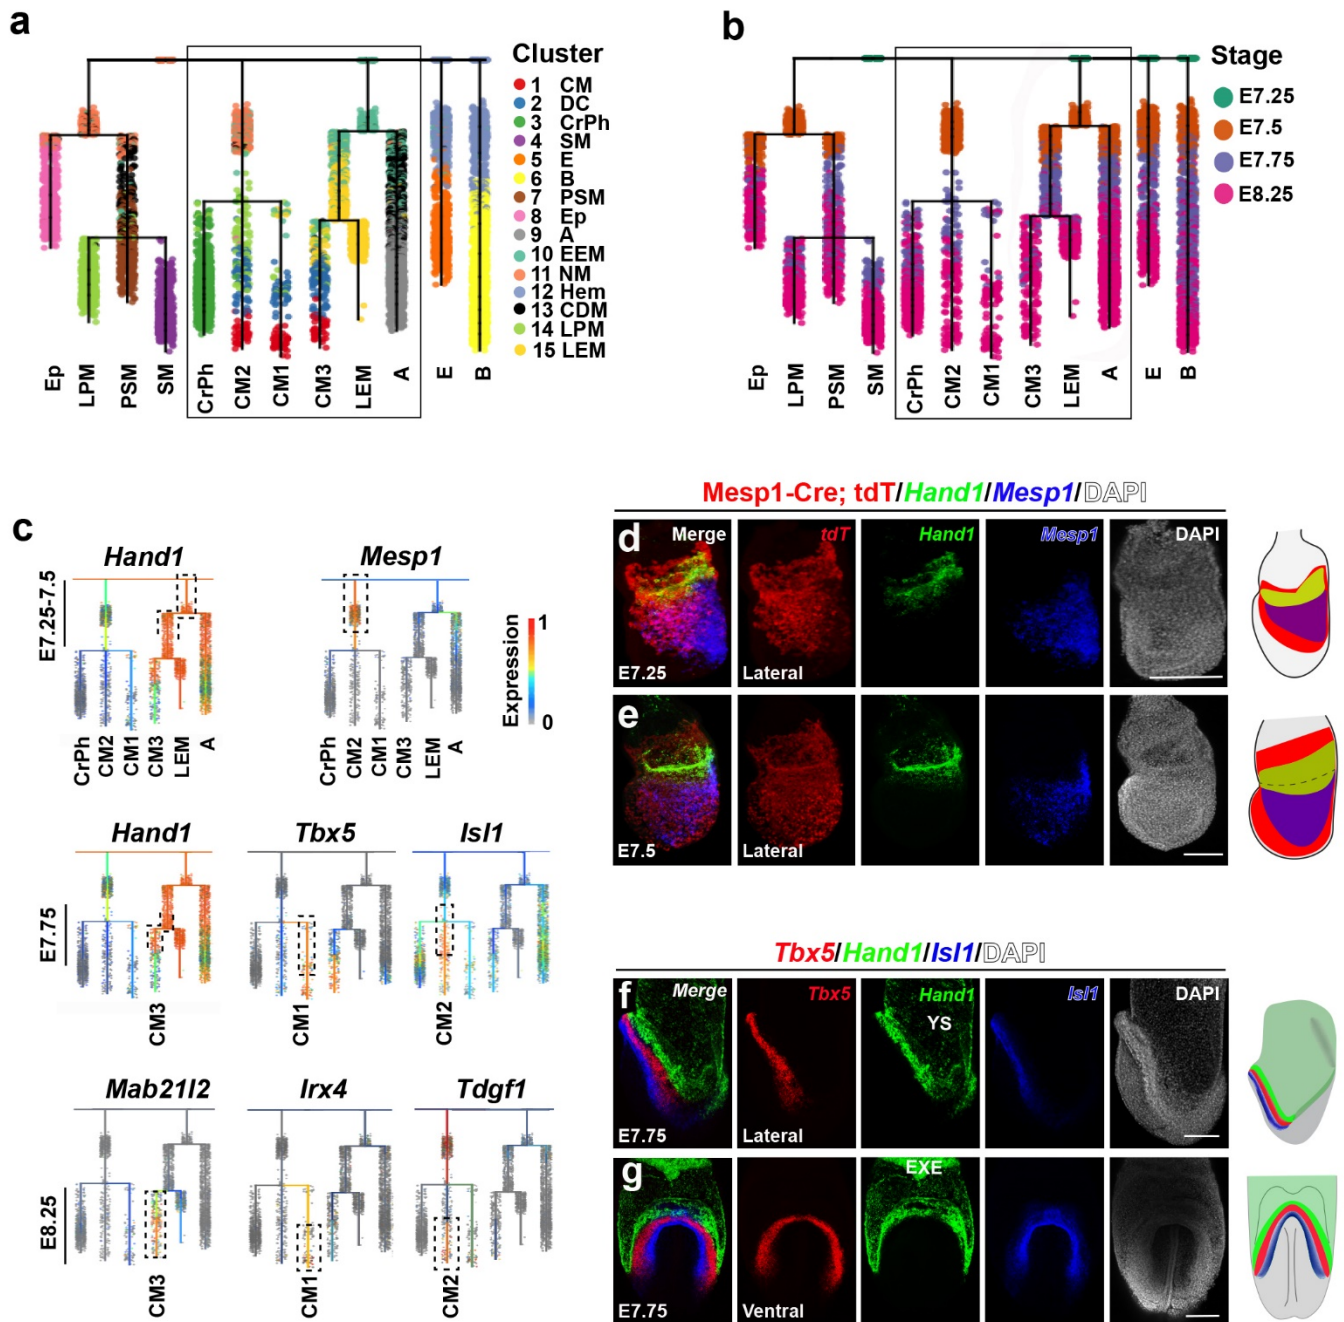

785



786 **Figure 3. Distinct cardiomyocyte lineages derive from intra- and extra-embryonic**  
787 **related developmental origins.** **a, b,** Reconstructed URD developmental cell lineage trees  
788 using the three distinct subclustered cardiomyocyte populations predict that CM1/CM2 and  
789 CM3 cardiomyocytes derive respectively from intra- and extra-embryonic related progenitor  
790 sources, as displayed by **(a)** cell type and **(b)** developmental stages. The cardiomyocyte-  
791 related branches of the URD developmental tree are outlined with box. **c,** Marker genes  
792 differentially expressed among the lineages for each cardiomyocyte subcluster are plotted on  
793 the URD cardiomyocyte-related branches. *Hand1* and *Mab21l2* mark early and late regions  
794 of the CM3 lineage, respectively. *Mesp1*, *Tbx5*, *Isl1*, *Irx4* and *Tdgf1* label different regions  
795 of the CM1 and CM2 lineage branches. **d, e,** RNAscope *in situ* hybridization (ISH) of  
796 *Mesp1* and *Hand1* was performed in **(d)** E7.25 and **(e)** E7.5 *Mesp1-Cre; Rosa26-tdT*  
797 embryos. The diagram illustrates both the gene expression pattern of *Hand1* and *Mesp1* and  
798 *Mesp1-Cre* lineage-traced cells in these embryos. **f, g,** RNAscope ISH of *Hand1*, *Tbx5*, and  
799 *Isl1* was performed in E7.75 embryos. The diagram illustrates the expression pattern of  
800 *Hand1*, *Tbx5*, and *Isl1* in these embryos. n = 3 per panel. Scale bars, 100  $\mu$ m. EXE,  
801 Extraembryonic Ectoderm; YS, Yolk Sac.

**Figure 4**

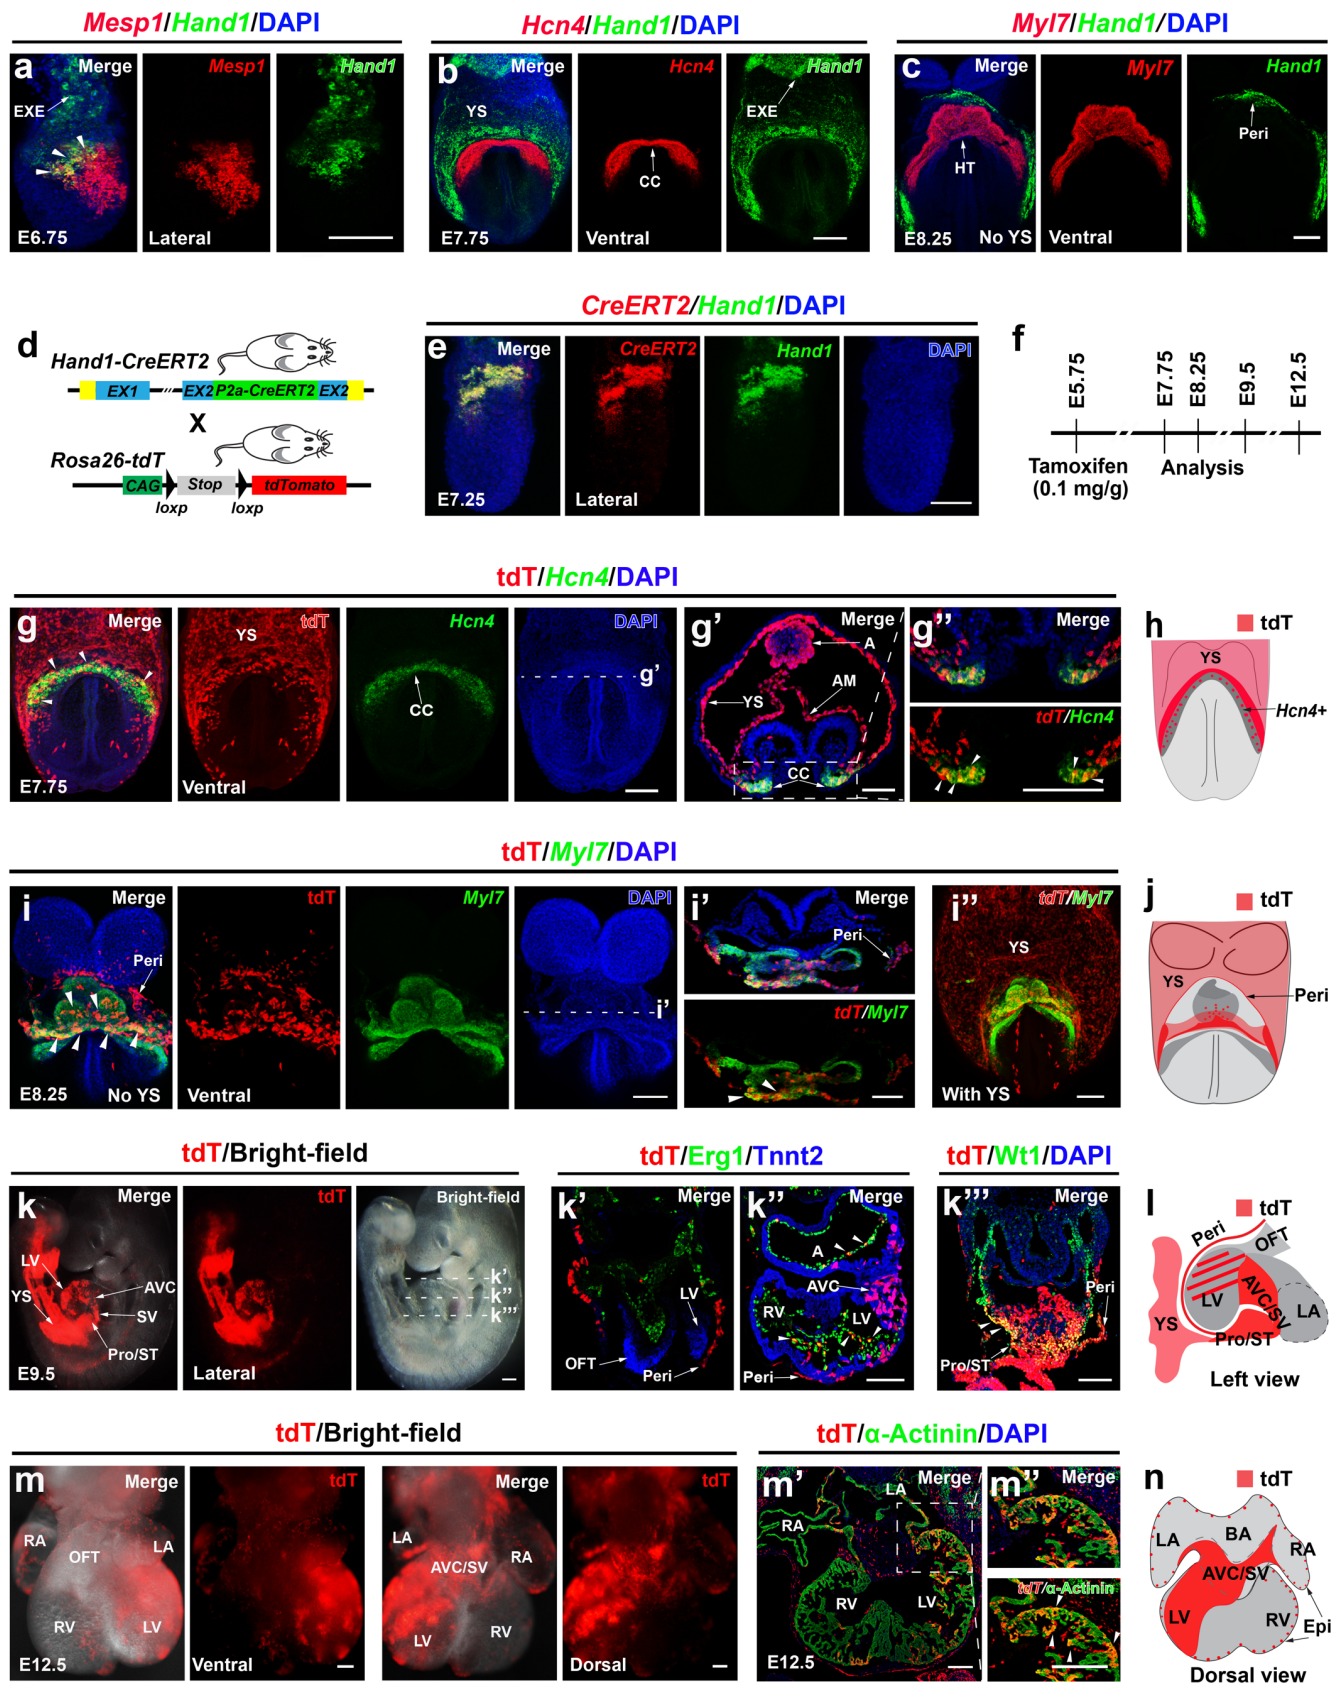

803 **Figure 4. Lineage tracing studies reveal that early gastrulating *Hand1*+ cells**  
804 **contribute to not only a distinct subpopulation of first heart lineage cardiomyocytes but**  
805 **also serosal mesothelial lineages (pericardial, epicardial cells) in the heart. a-c,**  
806 RNAscope *in situ* hybridization (ISH) reveals that *Hand1* is expressed with (a) *Mesp1* at the  
807 embryonic and extraembryonic boundary in E6.75 embryos (arrowheads), (b) dorso-laterally  
808 around the cardiac crescent as detected by *Hcn4* at E7.75, and (c) in the pericardium which  
809 overlays the heart tube (HT) as detected by *Myl7* at E8.25. The yolk sac and part of the  
810 pericardium were removed in c to show the underlying heart tube. **d-n,** Lineage tracing  
811 studies using *Hand1-CreERT2* and *Rosa26-tdT* mice (shown in d) map the fate of early  
812 gastrulating *Hand1*+ cells. **e,** RNAscope ISH in *Hand1-CreERT2* embryos shows that  
813 expression of *CreERT2* precisely recapitulates the expression of *Hand1*. **f,** Schematic  
814 outlines the experimental strategy for *Hand1-CreERT2* genetic fate mapping studies shown in  
815 **g-n.** Tamoxifen was given at E5.75, and embryos were examined for *Hand1-CreERT2*  
816 genetically-labeled tdT+ cells at E7.75, E8.25, E9.5 and E12.5. **g-n,** RNAscope ISH and  
817 immunohistochemistry of whole mount and cross sections of these embryos reveal the  
818 contribution of *Hand1-CreERT2* genetically-labeled tdT+ cells at (g) E7.75, (i) E8.25, (k)  
819 E9.5 and (m) E12.5. **g', i', k', k'', k''',** Insets show transverse sections of g, i, k at indicated  
820 dashed lines, respectively. **m',** Inset shows coronal section of m. **g'', m'',** Insets are  
821 magnification of g', m' boxed area. Arrowheads point to tdT+ cells expressing (g, g'')  
822 *Hcn4*, (i, i') *Myl7*, (k'') *Erg1*, (k''') *Wt1* and (m'')  $\alpha$ -Actinin. **h, j, l, n,** Diagrams  
823 summarize the anatomical location of *Hand1-CreERT2* genetically-labeled tdT+ cells at the  
824 embryonic stages analyzed. n = 3 embryos for each stage. Scale bars, 100  $\mu$ m. AM,  
825 Amnion; AVC, Atrioventricular Canal; BA, Base of the Atrium; CC, Cardiac Crescent; Epi,  
826 Epicardium; EXE, Extraembryonic Ectoderm; HT, Heart tube; LA, Left Atrium; LV, Left

827 Ventricle; OFT, Outflow Tract; Peri, Pericardium; Pro, Proepicardium; RA, Right Atrium;

828 RV, Right Ventricle; SV, Sinus Venosus; ST, Septum transversum; YS, Yolk Sac.

## Figure 5

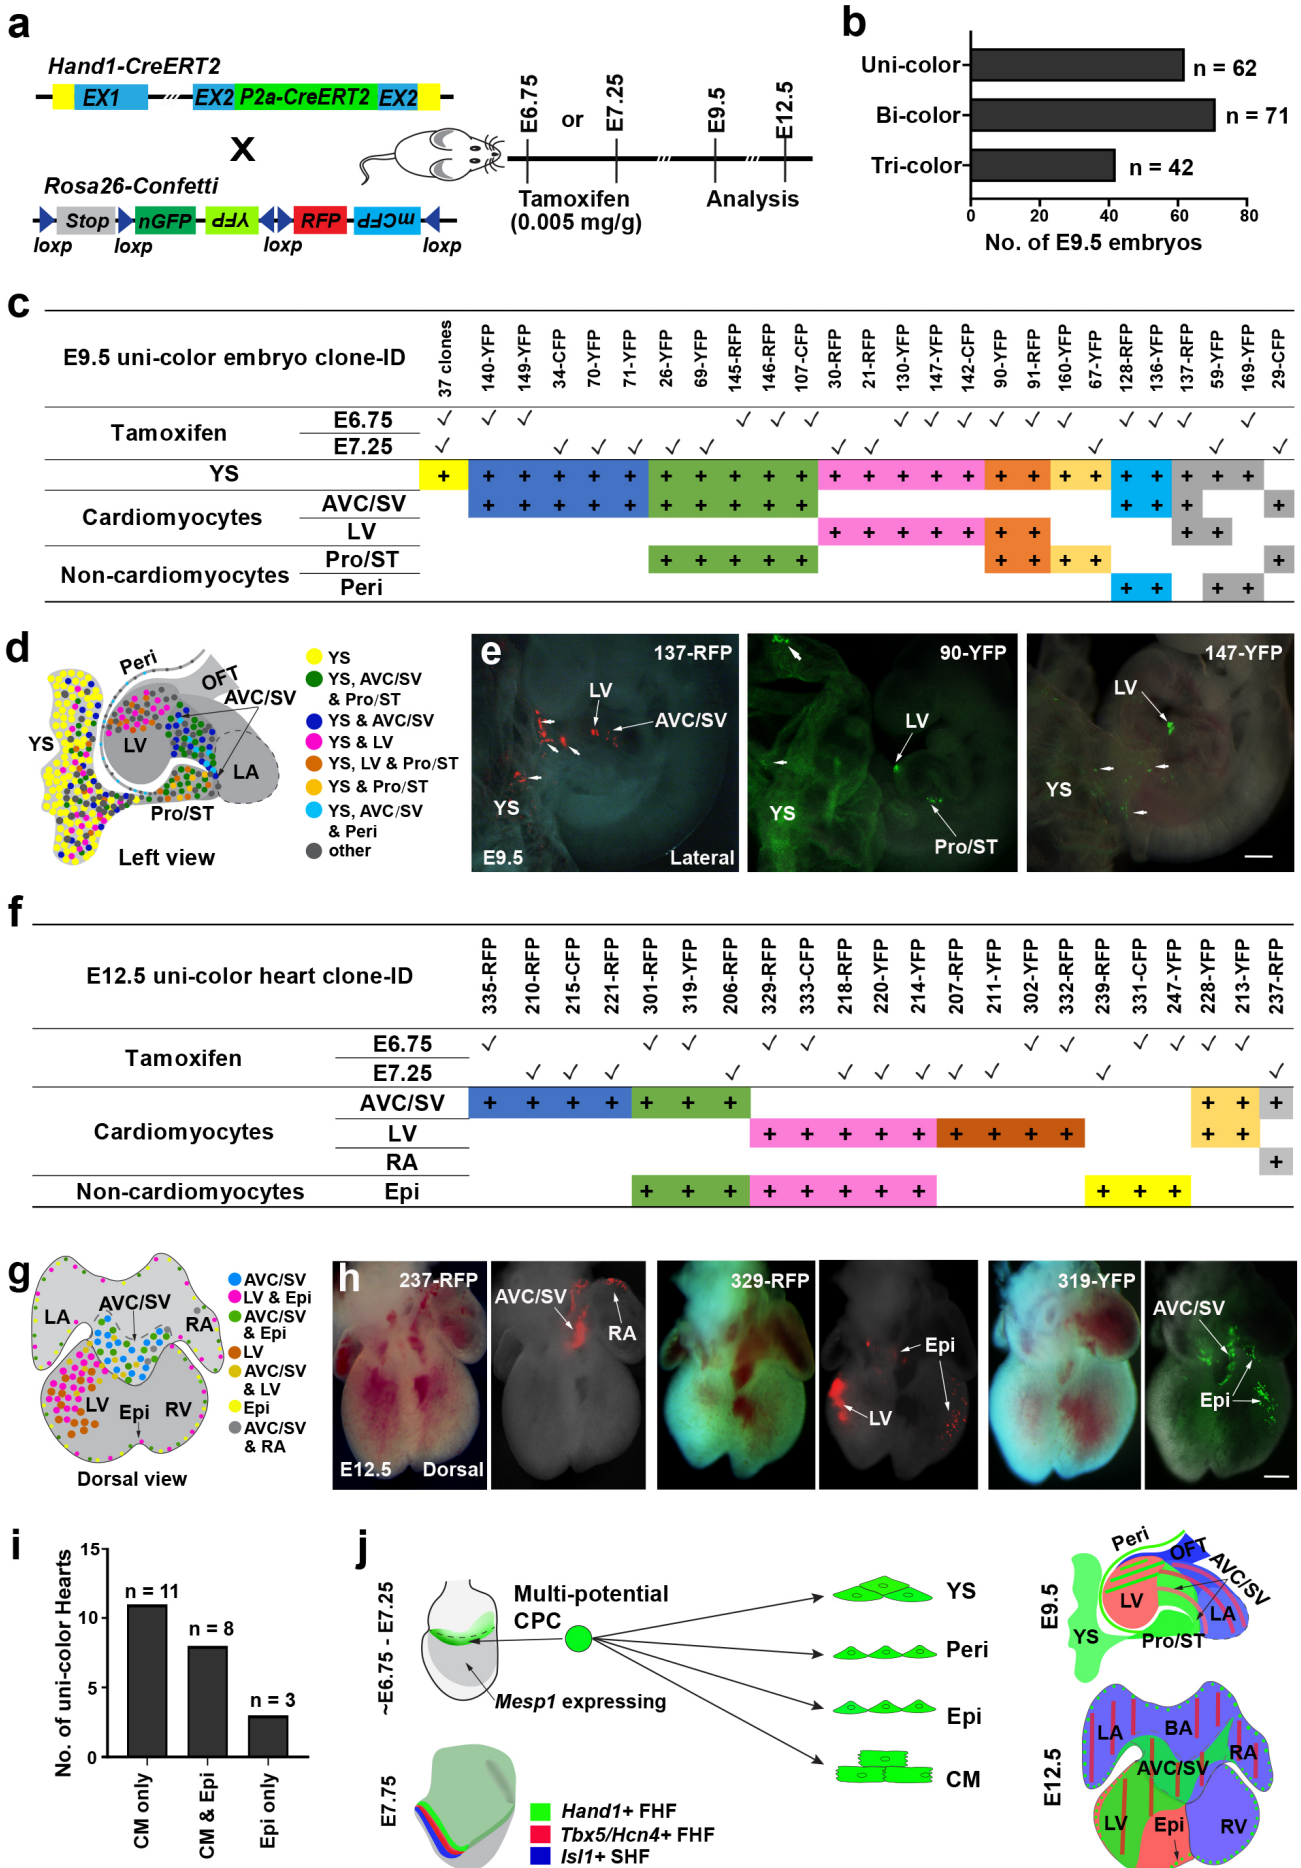

830 **Figure 5. Clonal analysis reveals multipotentiality in early *Hand1*+ progenitors.**  
831 **a**, Schematic outlines experimental strategy for *Hand1-CreERT2*; *Rosa26-Confetti* clonal  
832 analyses. **b**, Bar graph displays the number of uni-color, bi-color or tri-color *Hand1-*  
833 *CreERT2*; *Rosa26-Confetti* embryos at E9.5. **c, f**, Clonal analyses of uni-color (**c**) E9.5 and  
834 (**f**) E12.5 embryos reveal that individual *Hand1-CreERT2*; *Rosa26-Confetti* clones labeled at  
835 E6.75 or E7.25 have the capacity to generate multiple cell types that can contribute to the  
836 yolk sac and/or heart. **d, g**, Diagram summarizes the contribution of *Hand1-CreERT2*;  
837 *Rosa26-Confetti* genetically-labeled clones in the heart and yolk sac at (**d**) E9.5 and in the  
838 heart at (**g**) E12.5. **e, h**, Representative (**e**) E9.5 and (**h**) E12.5 uni-color embryos show  
839 individual *Hand1-CreERT2*; *Rosa26-Confetti* genetically-labeled clones contributing to  
840 different combinations of tissues and cell types: (**e**) AVC/SV, LV and YS (clone #137-RFP);  
841 LV, Pro/ST and YS (clone #90-YFP); LV and YS (clone #147-YFP); (**h**) AVC/SV and RA  
842 (clone # 237-RFP); LV and Epi (clone # 329-RFP); the AVC/SV and Epi (clone # 319-YFP).  
843 Arrowheads point to yolk sac cells in **e**. Scale bars, 200  $\mu$ m. **i**, Bar graph displays the  
844 number of uni-color E12.5 hearts with clones contributing to cardiomyocytes only, epicardial  
845 cells and cardiomyocytes, or only epicardial cells. **j**, Model summarizes the  
846 multipotentiality of *Hand1*+ cardiac progenitor cells (CPC) between E6.75 - E7.25 in relation  
847 to the contribution of reported FHF/SHF progenitors. AVC, Atrioventricular Canal; BA,  
848 Base of the Atrium; CM, cardiomyocytes; Epi, Epicardium; LA, Left Atrium; LV, Left  
849 Ventricle; OFT, Outflow Tract; Peri, Pericardium; Pro, Proepicardium; RA, Right Atrium;  
850 RV, Right Ventricle; SV, Sinus Venosus; ST, Septum Transversum; YS, Yolk Sac.

## Extended Data Figure 1

**a**

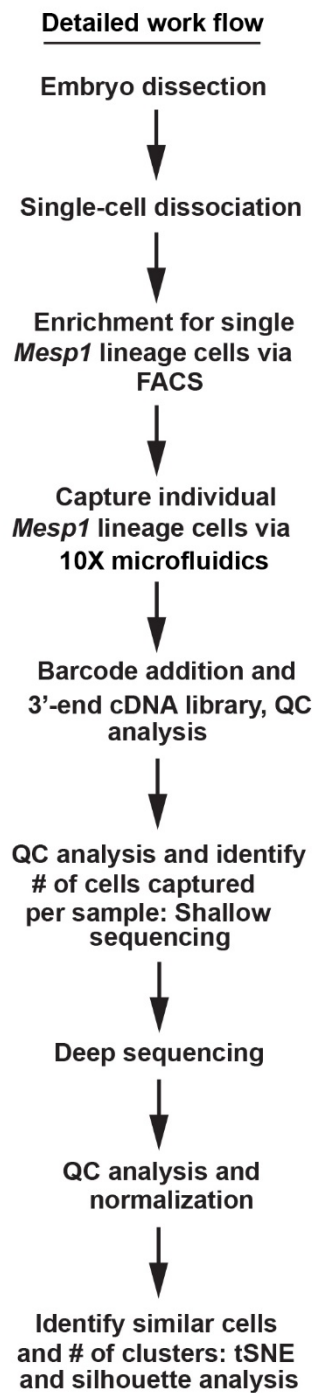

**b**

| Stage                               | Time of dissection | # of embryos per stage | # of sequencing batches | # of cells captured |
|-------------------------------------|--------------------|------------------------|-------------------------|---------------------|
| No Bud (OB)                         | E7.25              | 3                      | 1                       | 903                 |
| Late Bud (LB)                       | E7.5               | 12                     | 5                       | 2401                |
| Early Head Fold (EHF)               | E7.75              | 2                      | 2                       | 2226                |
| Somite (1-4)                        | E8.25              | 5                      | 3                       | 4977                |
| Total # of cells captured           |                    | 10507                  |                         |                     |
| Total # of cell analyzed (after QC) |                    | 9072                   |                         |                     |
| Average UMI per cell                |                    | 60450                  |                         |                     |
| Average # of genes per cell         |                    | 6062                   |                         |                     |
| Average sequence saturation         |                    | 65.7%                  |                         |                     |

**c**

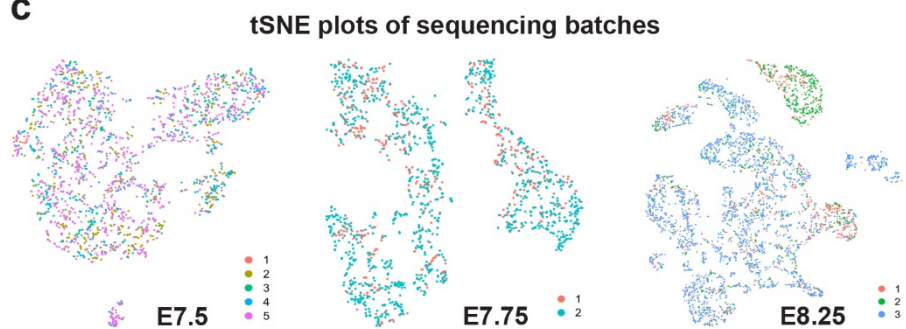

**d**

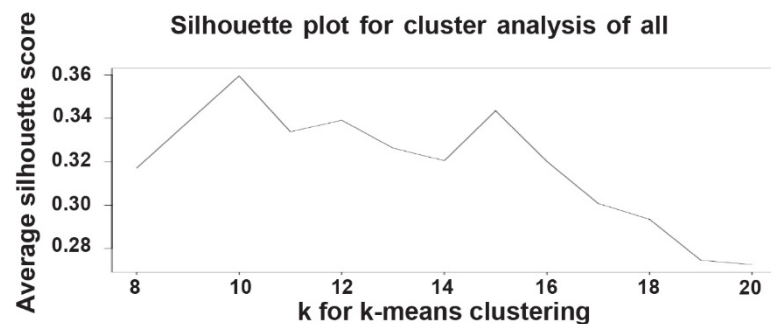

**e**

**# of cells per cluster per stage**

| Cluster | 1   | 2   | 3   | 4   | 5   | 6   | 7   | 8   | 9   | 10  | 11  | 12  | 13  | 14  | 15  |
|---------|-----|-----|-----|-----|-----|-----|-----|-----|-----|-----|-----|-----|-----|-----|-----|
| E7.25   |     |     |     |     |     |     |     | 5   | 206 | 304 | 246 | 21  |     |     |     |
| E7.5    |     |     | 2   |     | 2   | 1   | 2   | 61  | 2   | 516 | 843 | 498 | 135 | 4   | 29  |
| E7.75   |     | 26  | 120 | 73  | 93  | 310 | 132 | 43  | 77  | 101 |     | 133 | 137 | 109 | 227 |
| E8.25   | 113 | 169 | 685 | 434 | 311 | 482 | 238 | 225 | 893 | 54  | 1   | 25  | 202 | 397 | 382 |

851

852 **Extended Data Figure 1. *Mesp1*-Cre scRNA-seq experimental details show the**  
853 **sequencing, quality control and analysis parameters used on single mesoderm cells. a,**  
854 **Diagram outlines details of the scRNA-seq workflow. b, Table shows the number of**  
855 **embryos and cells harvested and studied at each experimental condition. c, tSNE plots of**  
856 **sequencing experiments show that scRNA-seq datasets are well mixed at each developmental**  
857 **stage with no appreciable batch effects. d, Average silhouette score shows how the number**  
858 **of clusters for scRNA-seq data was determined. e, Table shows the number of cells**  
859 **sequenced and analyzed in each identified cluster at specific stages.**



## Extended Data Figure 2

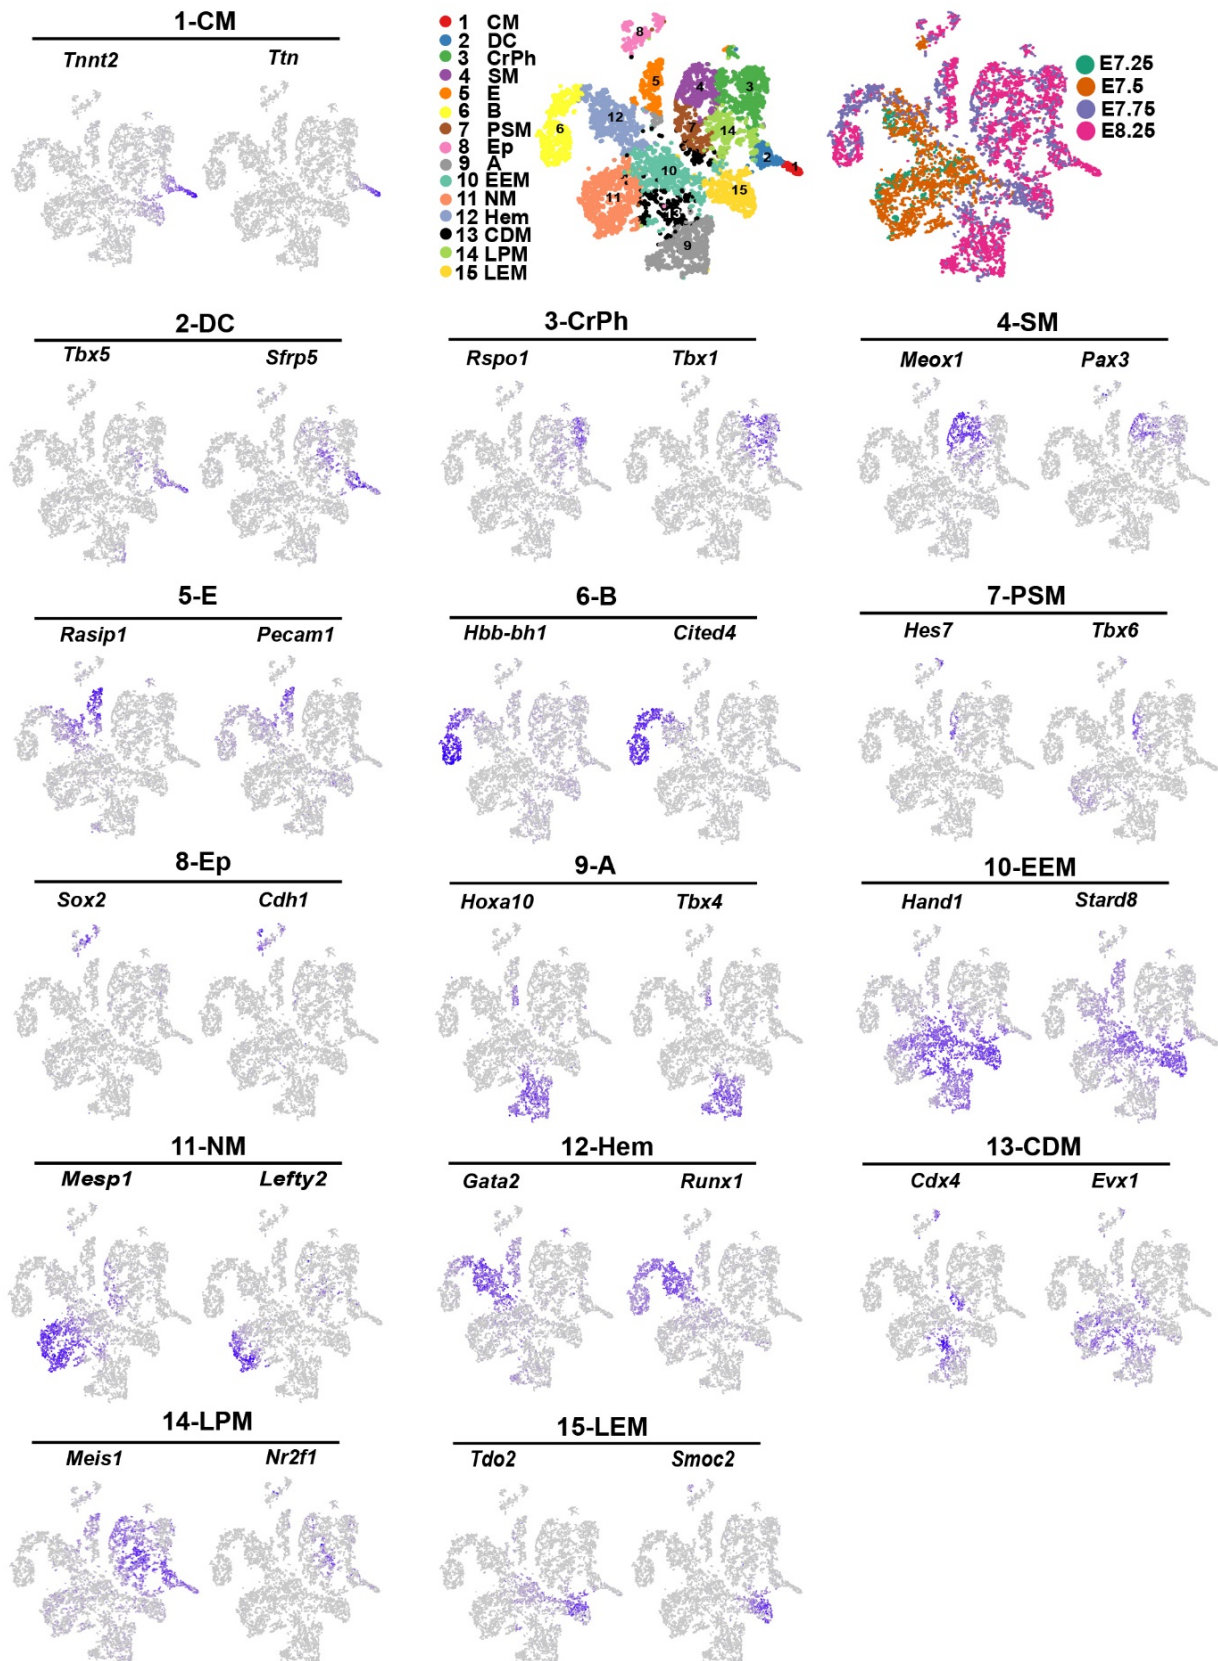

861 **Extended Data Figure 2. The expression of gene markers specific to identified clusters**  
862 **is visualized in tSNE plots of *Mesp1*-Cre scRNA-seq data.** The expression of two  
863 representative markers for each cluster are displayed on the single-cell tSNE layout of all  
864 developmental stages.

## Extended Data Figure 3

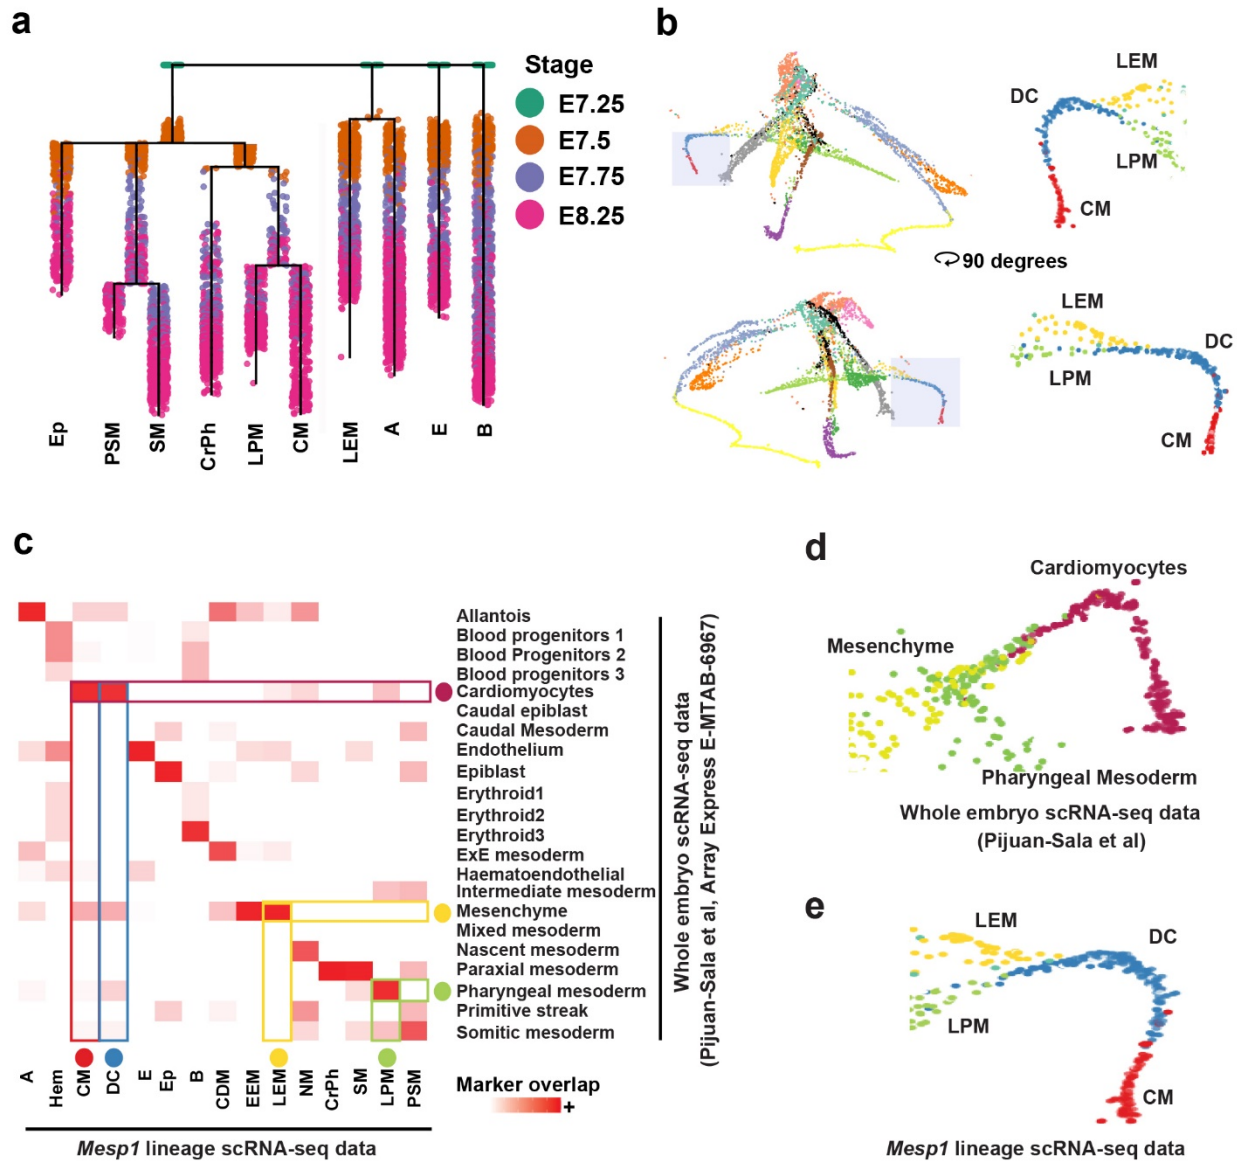

865

866 **Extended Data Figure 3. Trajectory analysis in an independent developing mouse**  
867 **embryo scRNA-seq dataset predicts similar intra- and extra-embryonic related**  
868 **developmental sources of cardiac progenitors.** **a**, Developmental stage of each RNA-  
869 sequenced *Mesp1*-Cre labeled cell was projected onto *Mesp1*-Cre URD developmental  
870 lineage tree reconstructed in Figure. 2**a**. **b**, 3D rotations of the force-directed *Mesp1*-Cre  
871 URD layout provide different views of late extraembryonic mesoderm (LEM) and lateral  
872 plate mesoderm (LPM) trajectories converging to form the cardiomyocyte branch. Shaded  
873 branches are magnified and shown to the right. **c**, Heatmap of identified cell-type clusters  
874 from *Mesp1*-Cre and independent mouse embryonic scRNA-seq datasets<sup>27</sup> reveals  
875 corresponding analogous cell-type populations between the datasets. **d, e**, An URD-derived  
876 force-directed layout of these independent scRNA-seq datasets shows how their analogous  
877 cell types exhibit similar converging trajectories that create cardiomyocytes.

878

## Extended Data Figure 4

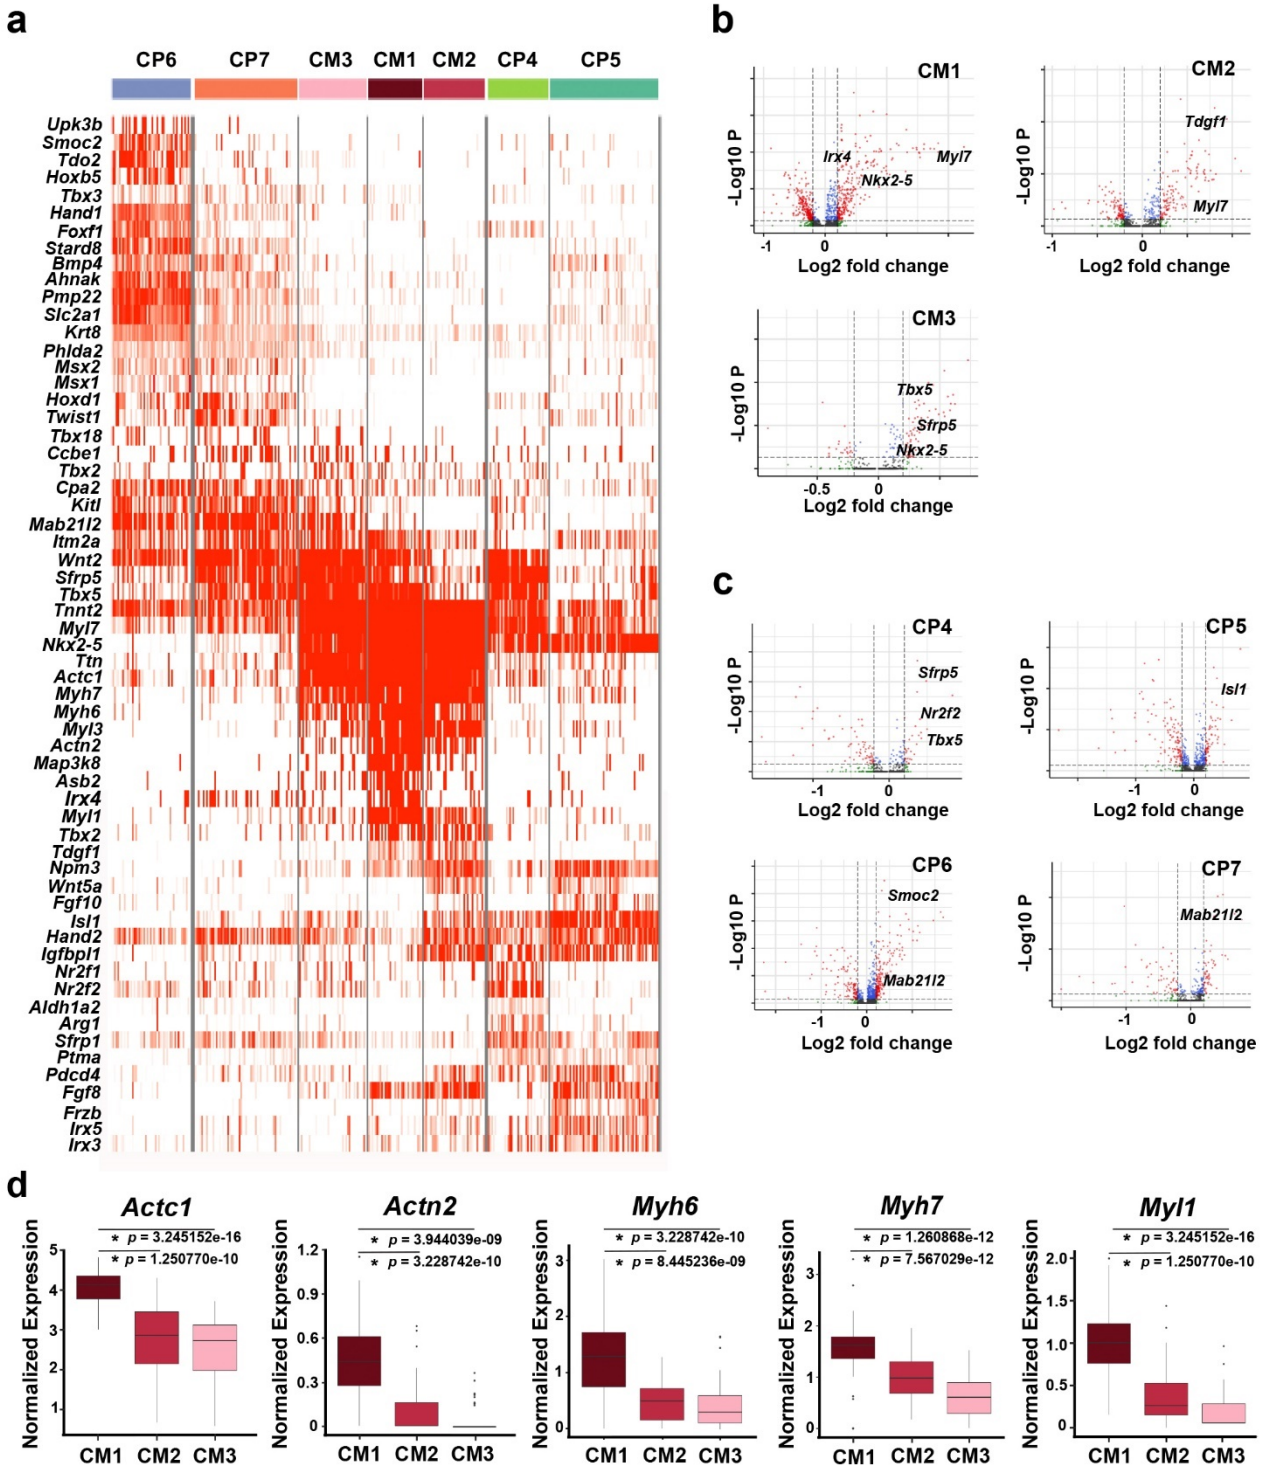

879 **Extended Data Figure 4. Differential gene expression analysis reveals cardiac subtype**  
880 **identities and transcriptional profiles.** **a**, An extended heatmap of differentially expressed  
881 genes among cardiac subclusters reveals distinct transcriptional profiles for each  
882 developmental cardiac subcluster cell type derived in Figure 2c. **b, c**, Volcano plots  
883 summarize the differential expression of each cardiac subcluster (**b**, cardiomyocyte  
884 subclusters and **c**, cardiac progenitor subclusters) compared to all other cardiac subclusters.  
885 **d**, Box plots show that CM1 cells display higher expression of *Actc1*, *Actn2*, *Myh6*, *Myh7* and  
886 *Myll* than that observed in CM2 and CM3. Median, 25<sup>th</sup> and 75<sup>th</sup> quartile, and extreme  
887 values within 1.5 times the interquartile range are indicated by the center line, bottom and top  
888 of the box, and ends of whiskers, respectively. Outliers outside 1.5 times the interquartile  
889 range appear as individual points. \* $p < 0.01$  by Wilcoxon rank sum test.

890

## Extended Data Figure 5

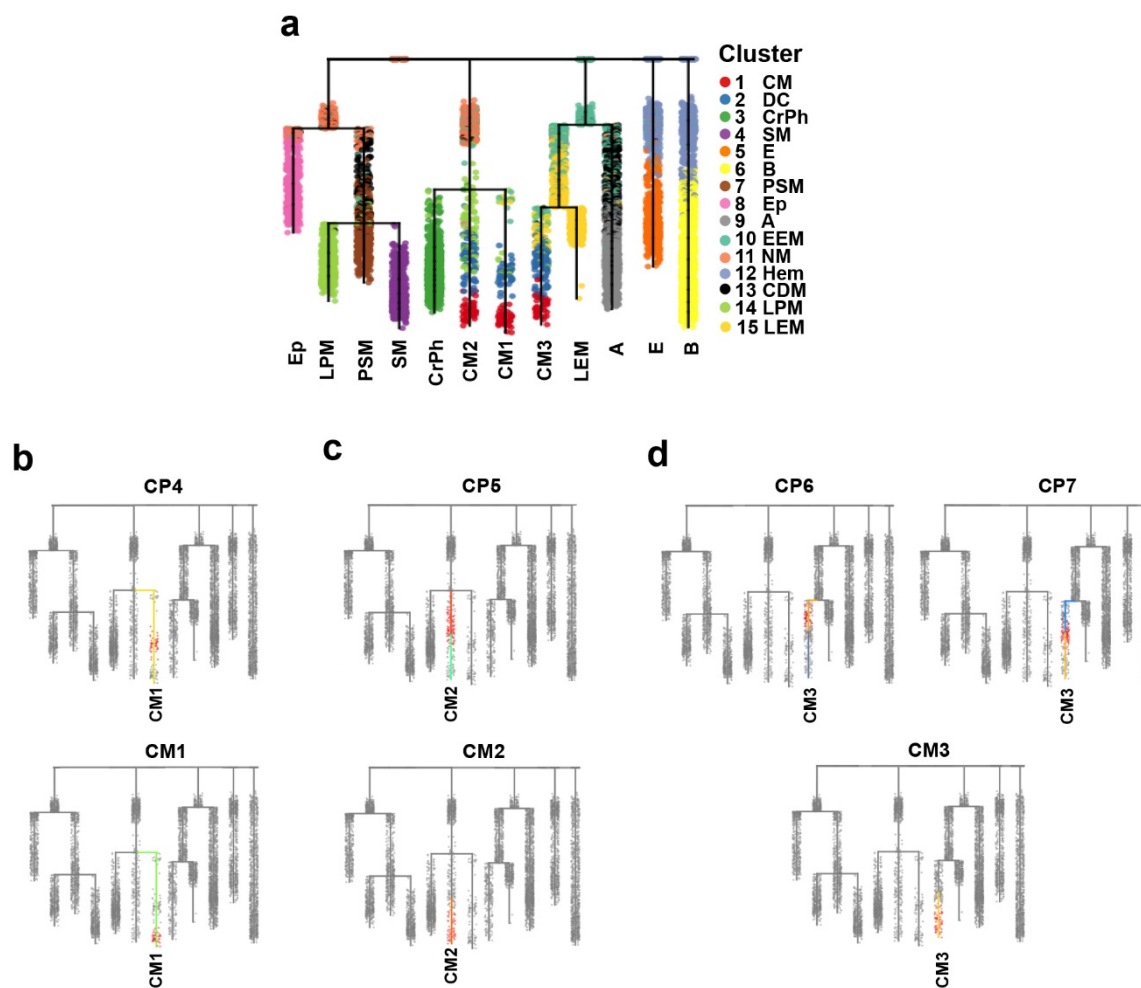

891 **Extended Data Figure 5. Cardiac subcluster cell types are located in specific branches**  
892 **of *Mesp1*-Cre URD developmental lineage tree. a-d,** Each identified cardiac subcluster  
893 from Figure 2c is projected onto the (a) URD developmental lineage tree from Figure 3a.  
894 Projections of these subclusters show that they reside in specific regions of the (b) CM1, (c)  
895 CM2 and (d) CM3 branches.



896

## Extended Data Figure 6

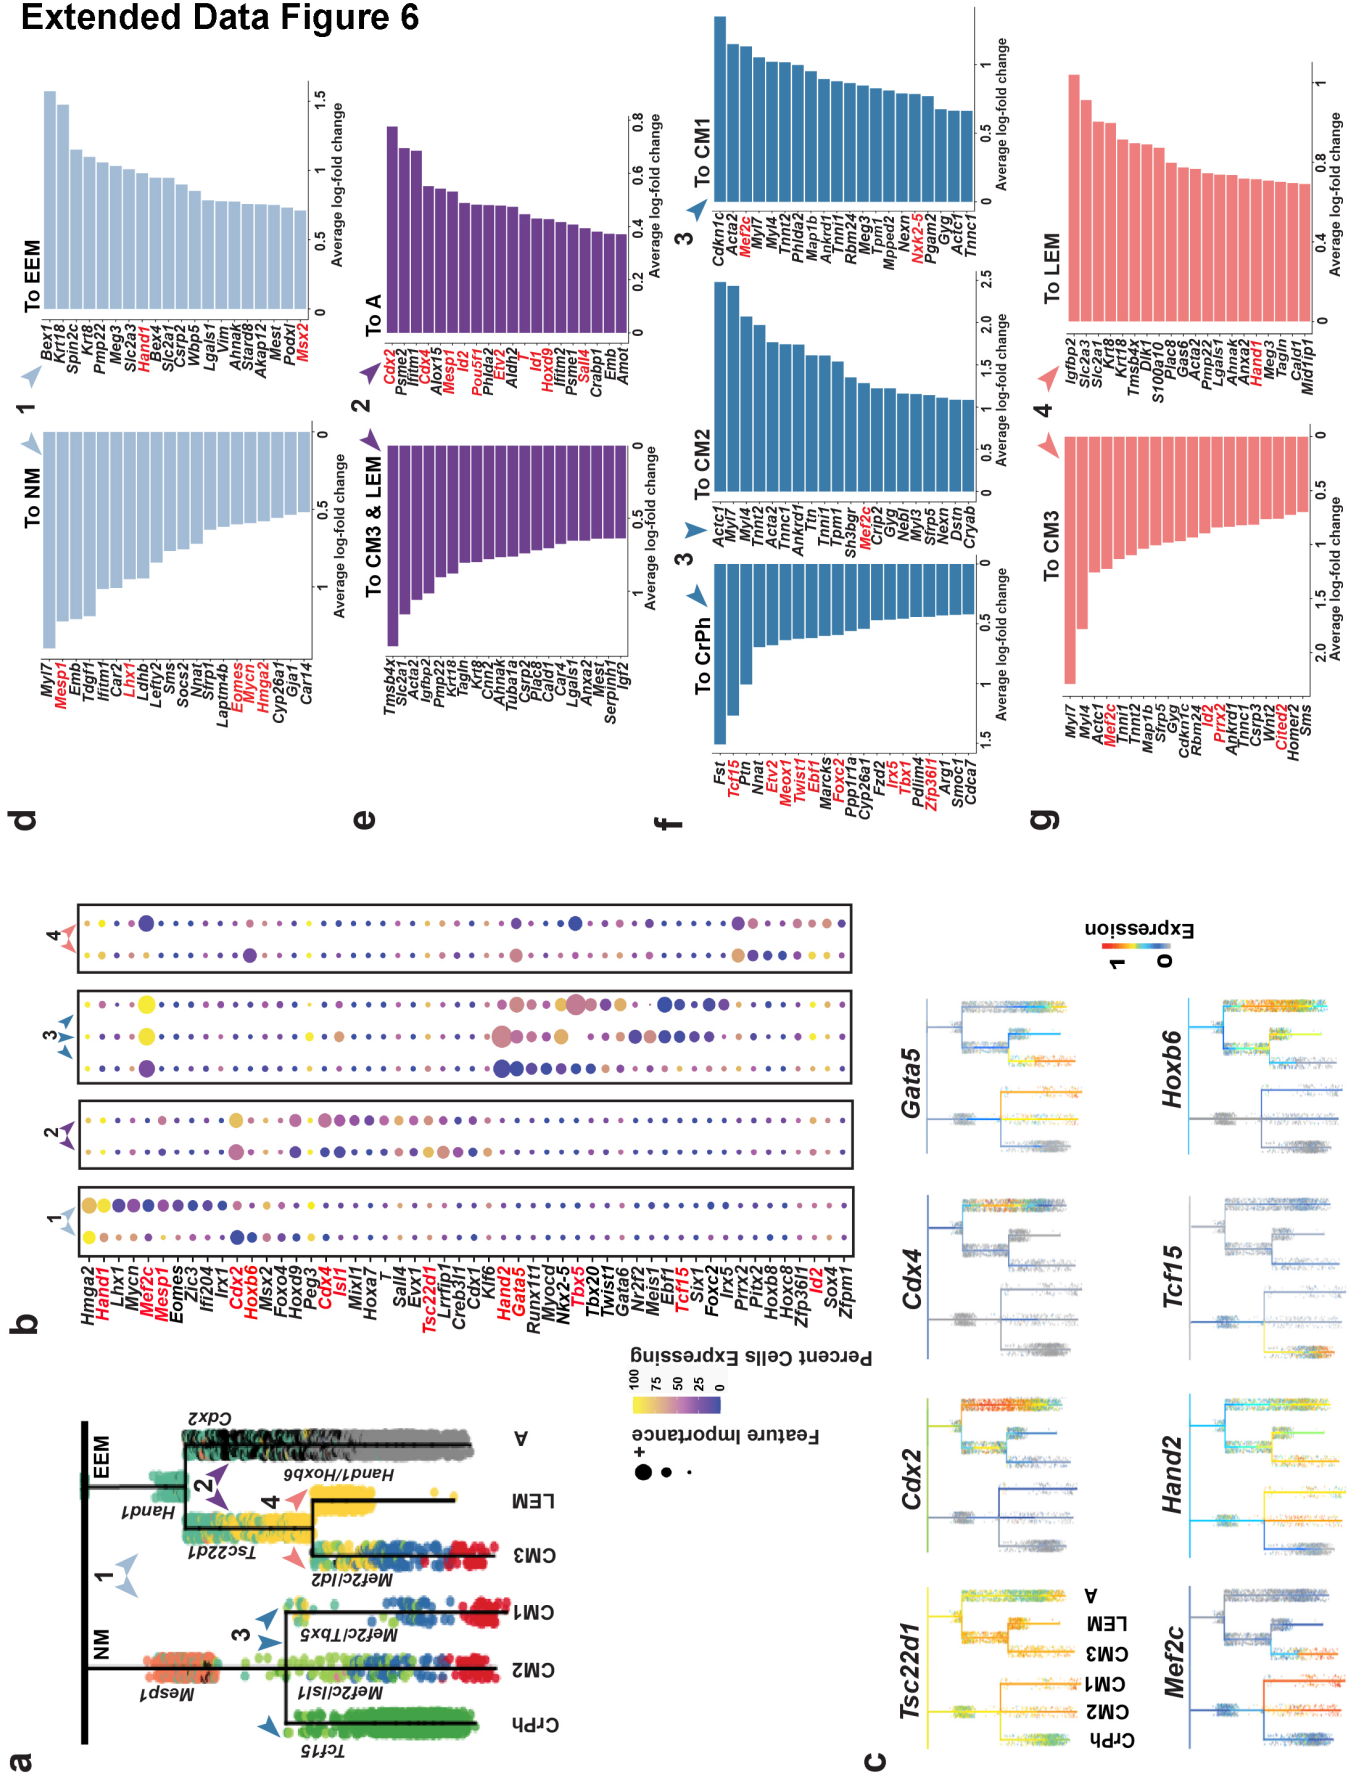

897 **Extended Data Figure 6. Branch point analyses of *Mesp1*-Cre cardiac lineage**  
898 **trajectories reveal molecular pathways for the development of distinct cardiac cell**  
899 **types. a**, The cardiomyocyte-related branches of the URD developmental tree display the  
900 branch point decisions taken by cells differentiating into cardiomyocytes. Representative  
901 important transcription factors as determined in **b** are indicated on the corresponding  
902 branches of the URD developmental lineage tree. Cells are colored by their identity (see  
903 Figure 1) and numbers indicate each designated branch point analyzed. Arrowheads point  
904 to daughter branches. **b**, A random forest model was applied to predict the importance of  
905 individual transcription factors in directing cells to specific daughter branches at branch  
906 points labeled in **a**. The top ten transcription factors per branch, ranked by their importance,  
907 are shown as noted by size of dots, which are colored by the percentage of cells in each  
908 contrasting class/cells in the daughter branch just after the branch point. Red labeled genes  
909 indicate representative transcription factors for each branch. **c**, The expression of  
910 representative important transcription factors in **b** is projected onto the cardiomyocyte-related  
911 branches of the URD developmental lineage tree (also see Figure 3c). **d-g**, Bar plots display  
912 the most differentially expressed genes between the contrasting classes/cells in the daughter  
913 branch just after each respective branch point (as indicated by numbers and arrowheads).  
914 Transcription factors are labeled in red. Numbers and colored arrowheads indicate branch  
915 points marked in panel (**a**).  
916

## Extended Data Figure 7

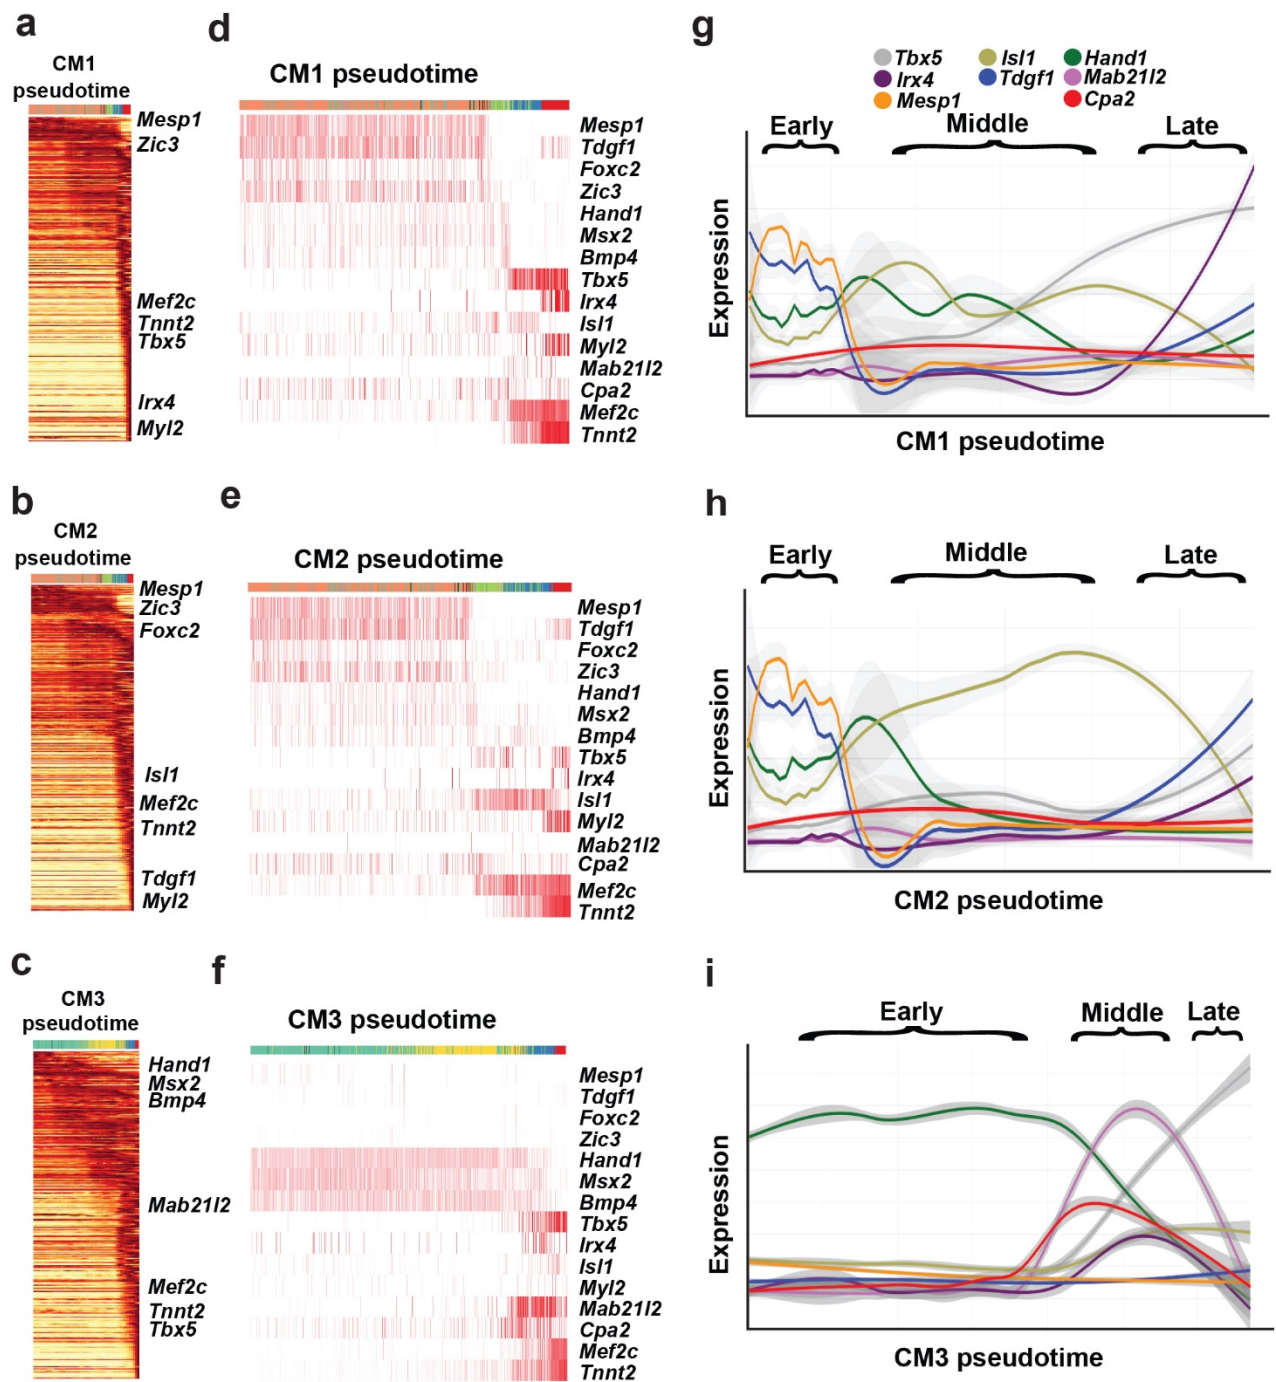

917

918 **Extended Data Figure 7. Pseudotime analyses of URD developmental lineage tree**  
919 **reveal the major developmental states and gene expression dynamics for each**  
920 **cardiomyocyte subcluster cell type. a-c,** Heatmaps of differentially expressed genes for  
921 **(a) CM1, (b) CM2 and (c) CM3** trajectories are displayed according to the pseudotime for  
922 each respective trajectory. **d-f,** Heatmaps of selected genes for **(d) CM1, (e) CM2 and (f)**  
923 **CM3** trajectories are displayed according to the pseudotime for each respective trajectory.  
924 Corresponding cell types that are ordered by pseudotime and colored according to their cell  
925 identities in Figure 1 are shown at the top of each heatmap for **a-f. g-i,** Gene expression of  
926 key markers for each cardiomyocyte subcluster trajectory is plotted along the pseudotime for  
927 each of these trajectories (**g** – CM1, **h** – CM2, **i** – CM3). Colored lines indicate each gene  
928 examined (see legend above plots). Brackets signify pseudotime stages for each  
929 cardiomyocyte subcluster pseudotime plot.

930

## Extended Data Figure 8

*Tbx5/Hand1/Isi1/DAPI*

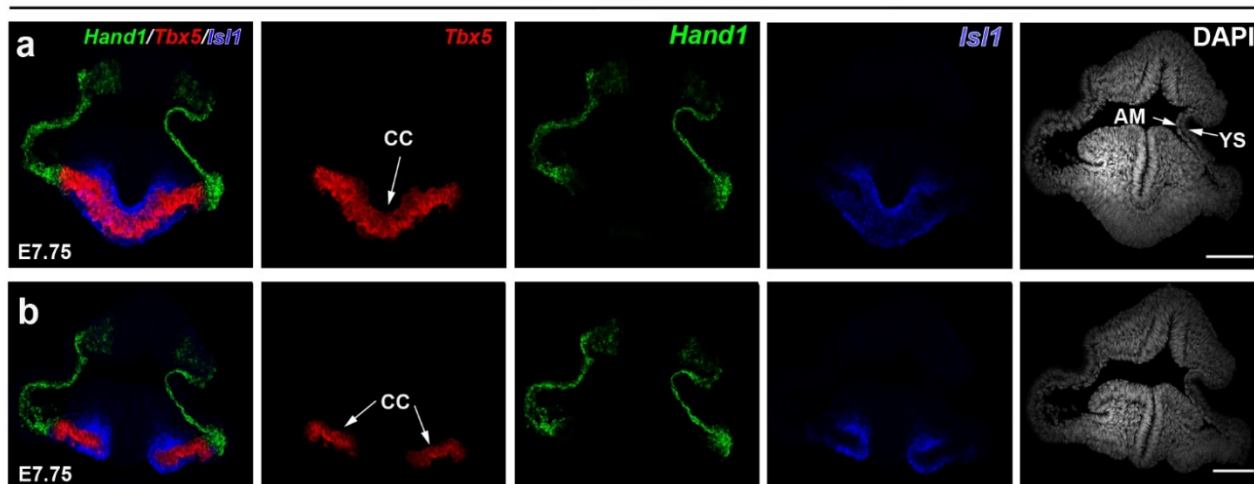

931 **Extended Data Figure 8. *Hand1*, *Tbx5* and *Isl1* are expressed in specific domains of the**  
932 **crescent region. a, b**, RNAscope ISH studies on transverse sections of E7.75 embryos  
933 reveal that *Hand1*, *Tbx5* and *Isl1* are expressed in distinct but complementary domains within  
934 the crescent region. Furthermore, *Hand1* is expressed in additional areas that are outside but  
935 contiguous with the *Tbx5*-expressing cardiac crescent (CC). **a, b** panels show two different  
936 levels of the crescent region. n = 3 embryos. Scale bars, 100  $\mu$ m. AM, Amnion; YS, Yolk  
937 Sac.

938

## Extended Data Fig. 9

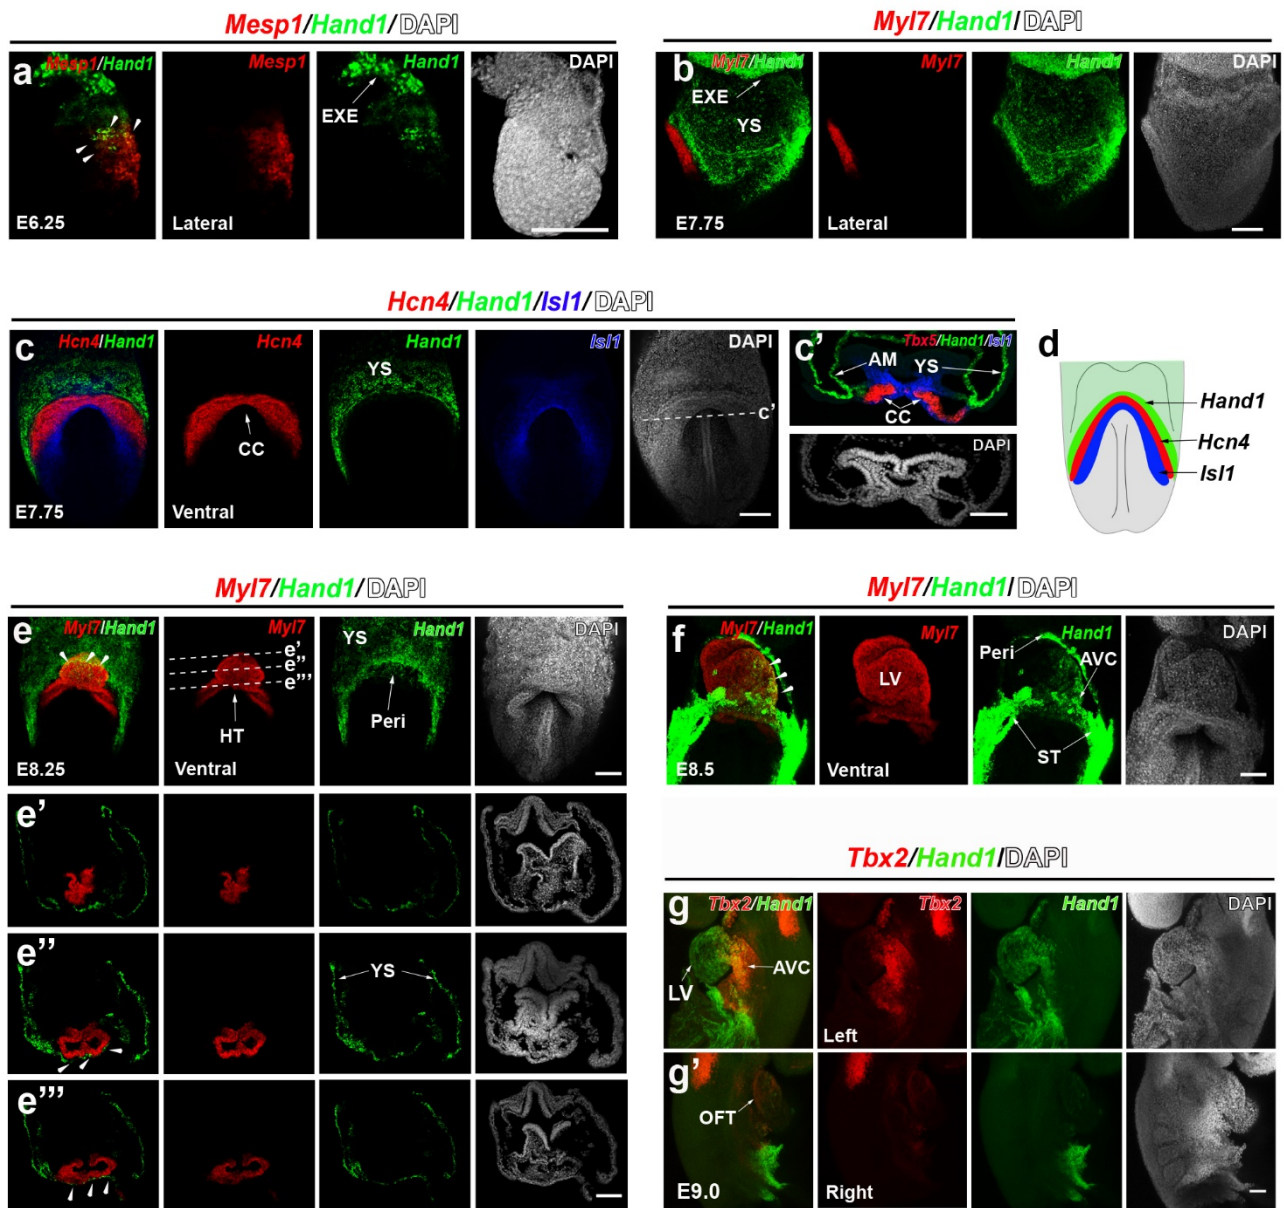

939

940 **Extended Data Fig. 9. *Hand1* exhibits spatiotemporally dynamic expression in**  
941 **embryonic and extraembryonic tissues during embryogenesis.** RNAscope *in situ*  
942 hybridization (ISH) studies were performed across different stages of mouse development to  
943 examine the dynamic expression of *Hand1* during embryogenesis. **a**, *Hand1* and *Mesp1* are  
944 co-expressed at the embryonic and extraembryonic boundary (arrowheads) in E6.25 embryos.  
945 **b**, *Hand1* is expressed in a region that is outside but contiguous with the *Myl7* expressing  
946 cardiac crescent in E7.75 embryos. **c, d**, *Hand1* expression complements *Hcn4* and *Isl1*  
947 expression in the crescent region at E7.75. **c'**, Inset shows transverse section of **c** at dashed  
948 line. **d**, Diagram illustrates *Hand1*, *Hcn4* and *Isl1* expression in the crescent region as  
949 shown in **c**. **e**, *Hand1* is expressed in the yolk sac and pericardium (arrowheads) which  
950 overlay the heart tube as detected by *Myl7* expression, but is not expressed in differentiated  
951 cardiomyocytes in E8.25 embryos. **e', e'', e'''** Insets show transverse serial sections of the  
952 heart tube at corresponding dashed lines in **e**. **f**, *Hand1* is strongly expressed in the ST and  
953 pericardium, but weakly expressed in *Myl7*<sup>+</sup> differentiated cardiomyocytes in the primitive  
954 LV and AVC (arrowheads) in E8.5 embryos. **g, g'**, *Hand1* is expressed in the AVC (*Tbx2*<sup>+</sup>)  
955 and LV, but is not expressed in the OFT in E9.0 embryos as shown in (**g**) left and (**g'**) right  
956 lateral views. n = 3 per panel. Scale bars, 100 μm. AM, Amnion; AVC, Atrioventricular  
957 Canal; CC, Cardiac Crescent; EXE, Extraembryonic Ectoderm; Heart tube, HT; OFT,  
958 Outflow Tract; Peri, Pericardium; ST, Septum Transversum; LV, Left Ventricle; YS, Yolk  
959 Sac.



960

## Extended Data Figure 10

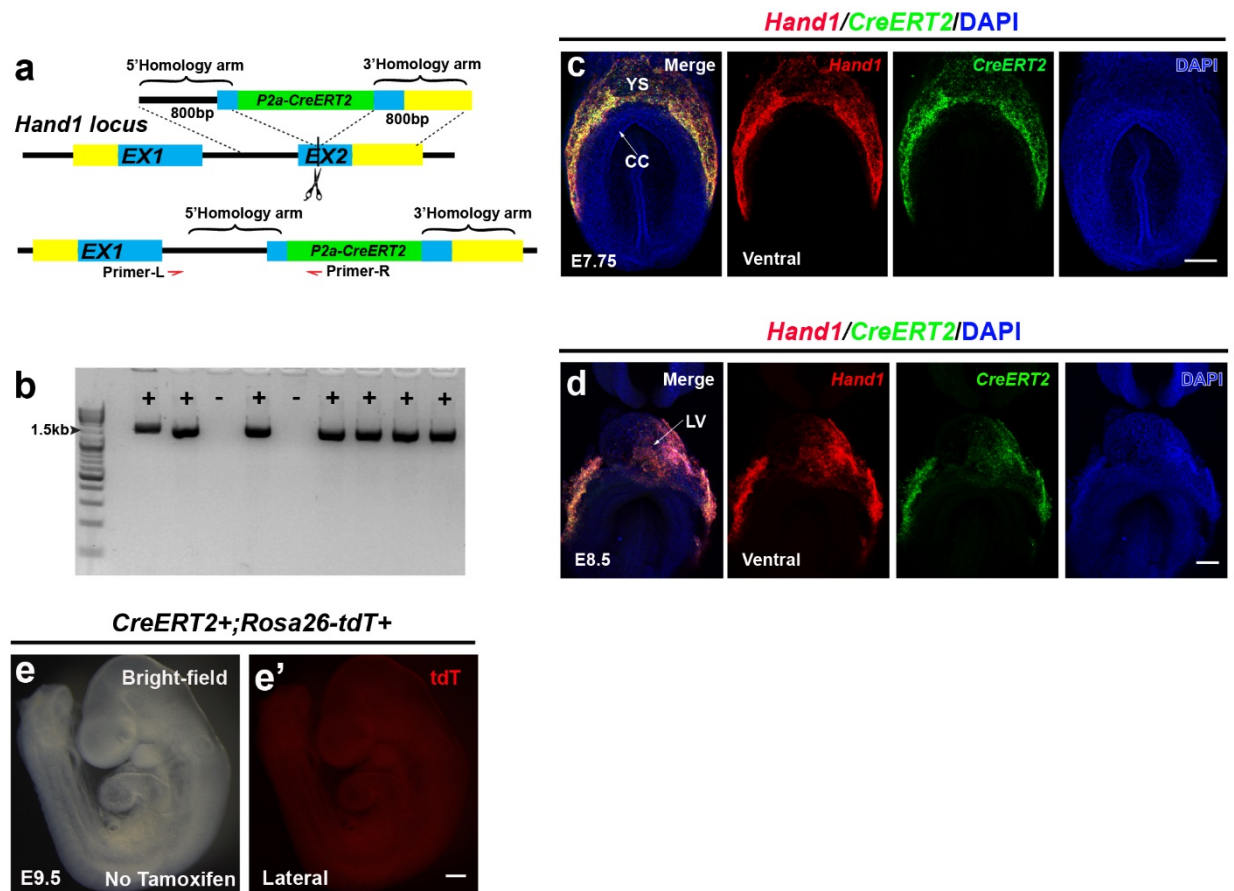

961 **Extended Data Figure 10. *Hand1-CreERT2* mouse line was generated by targeting a**  
962 ***P2a-CreERT2* construct into the second exon of the *Hand1* locus.** **a**, Schematic illustrates  
963 the targeting strategy to create the *Hand1-CreERT2* mouse line. **b**, PCR analysis shows the  
964 genotyping for the identification of wildtype and *Hand1-CreERT2* alleles. **c, d**, RNAscope  
965 *in situ* hybridization studies reveal that the expression of *CreERT2* from *Hand1-CreERT2*  
966 mouse embryos recapitulates the endogenous expression of *Hand1* at **(c)** E7.75 and **(d)** E8.5.  
967 n = 3 per panel. Scale bars, 150  $\mu$ m. **e**, In the absence of tamoxifen, no *Hand1-CreERT2*  
968 genetically-labeled tdT<sup>+</sup> cells were observed in the E9.5 *Hand1-CreERT2; Rosa26-tdT*  
969 embryos. n = 5 embryos. Scale bars, 300  $\mu$ m. CC, Cardiac Crescent; LV, Left Ventricle;  
970 YS, Yolk Sac.

971

## Extended Data Figure 11

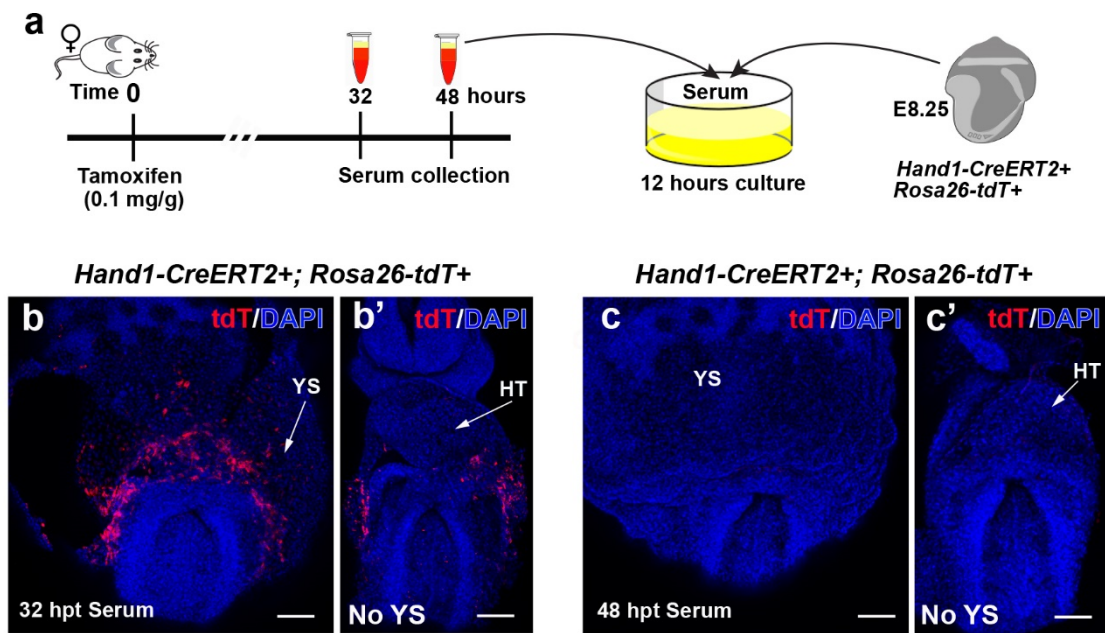

972 **Extended Data Figure 11. Tamoxifen can induce recombination up to 32 hours after**  
973 **treatment.** **a**, Schematic illustrates experimental design for testing the perdurance of  
974 tamoxifen after treatment. Wild-type Black Swiss adult females were given tamoxifen at a  
975 0.1 mg/g dose, and serum was collected at 32 and 48 hours post tamoxifen treatment (hpt).  
976 E8.25 *Hand1-CreERT2; Rosa26-tdT* embryos were cultured in collected sera for 12 hours.  
977 **b, b'**, These *Hand1-CreERT2; Rosa26-tdT* embryos cultured in serum collected 32 hours  
978 after tamoxifen treatment exhibited some *Hand1-CreERT2* genetically-labeled tdT<sup>+</sup> cells in  
979 the yolk sac but not in the heart tube. n = 3. Scale bars, 150µm. **c, c'**, However, no  
980 genetically-labeled tdT<sup>+</sup> cells were observed in *Hand1-CreERT2; Rosa26-tdTomato* embryos  
981 cultured in serum collected 48 hours after tamoxifen treatment. n = 4. Scale bars, 150µm.  
982 The extraembryonic tissue and part of the pericardium tissue were removed in **b', c'** to show  
983 the underlying heart tube. HT, Heart Tube; YS, Yolk Sac.

984

## Extended Data Figure 12

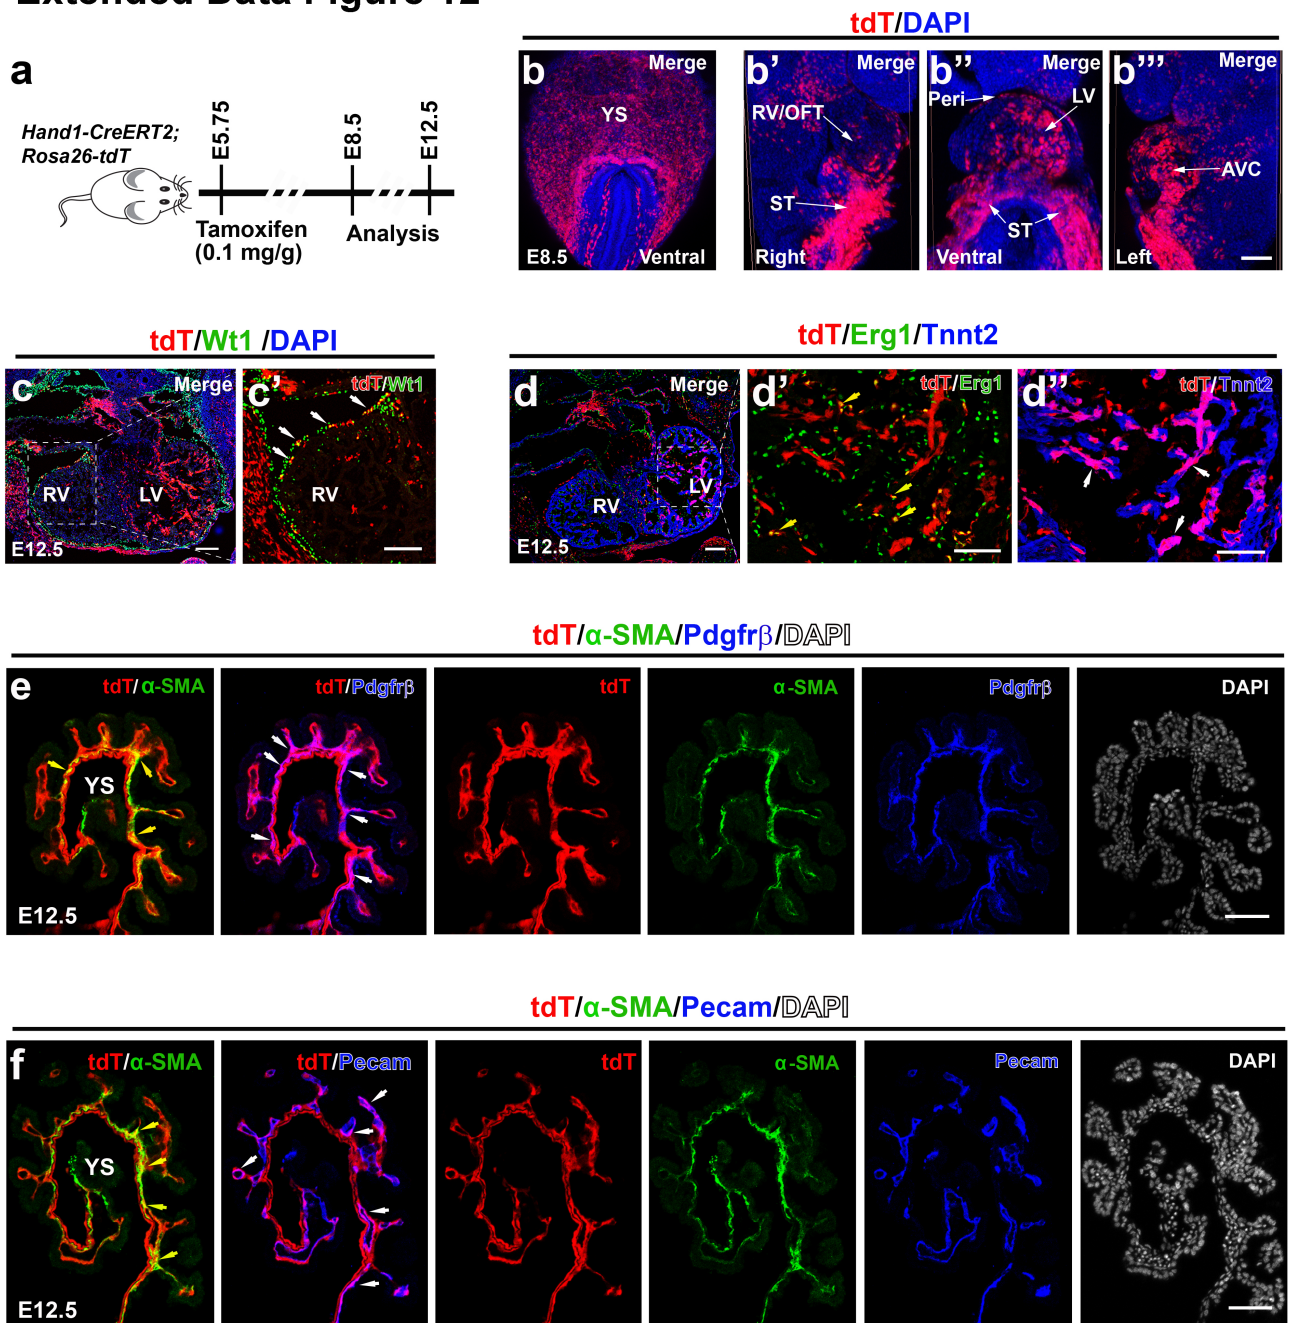

985 **Extended Data Figure 12. Lineage tracing studies show that early gastrulating *Hand1*+**  
986 **cells contribute specifically to left ventricular cardiomyocytes, epicardial and few**  
987 **endocardial cells in the heart as well as endothelial cells, vascular support cells and**  
988 **mesothelial cells in the yolk sac. a**, Schematic illustrates the experimental strategy that was  
989 used to assess the contribution of E5.75 genetically-labeled *Hand1-CreERT2; Rosa26-tdT*  
990 cells to E8.5 and E12.5 embryos. **b**, Whole mount embryo imaging shows that these *Hand1-*  
991 *CreERT2* genetically-labeled tdT<sup>+</sup> cells contribute to the yolk sac and developing heart at  
992 E8.5. **b'**, **b''**, **b'''**, The yolk sac (YS) and part of the pericardium tissue were removed in  
993 these panels to view the developing heart. **c-f**, Immunohistochemistry of cross-sectioned  
994 *Hand1-CreERT2; Rosa26-tdT* embryos at E12.5 reveals that *Hand1-CreERT2* genetically-  
995 labeled tdT<sup>+</sup> cells contribute to epicardial (**c**, **c'**, Wt1, white arrowheads), myocardial (**d**, **d''**,  
996 Tnnt2, white arrowheads) and few endocardial cells (**d**, **d'**, Erg1, yellow arrowheads) in the  
997 heart as well as (**e**, **f**) smooth muscle cells ( $\alpha$ -SMA, yellow arrowheads), (**e**) mesothelial cells  
998 (Pdgfr $\beta$ , white arrowheads) and (**f**) endothelial cells (Pecam, white arrowheads) in the yolk  
999 sac. **c'**, **d'/d''**, Insets are magnification of **c**, **d** boxed area, respectively. n = 3 per panel.  
1000 Scale bars, 100  $\mu$ m. AVC, Atrioventricular Canal; LV, Left Ventricle; OFT, Outflow Tract;  
1001 Peri, Pericardium; ST, septum transversum; RV, Right Ventricle; YS, Yolk Sac.

## Extended Data Figure 13

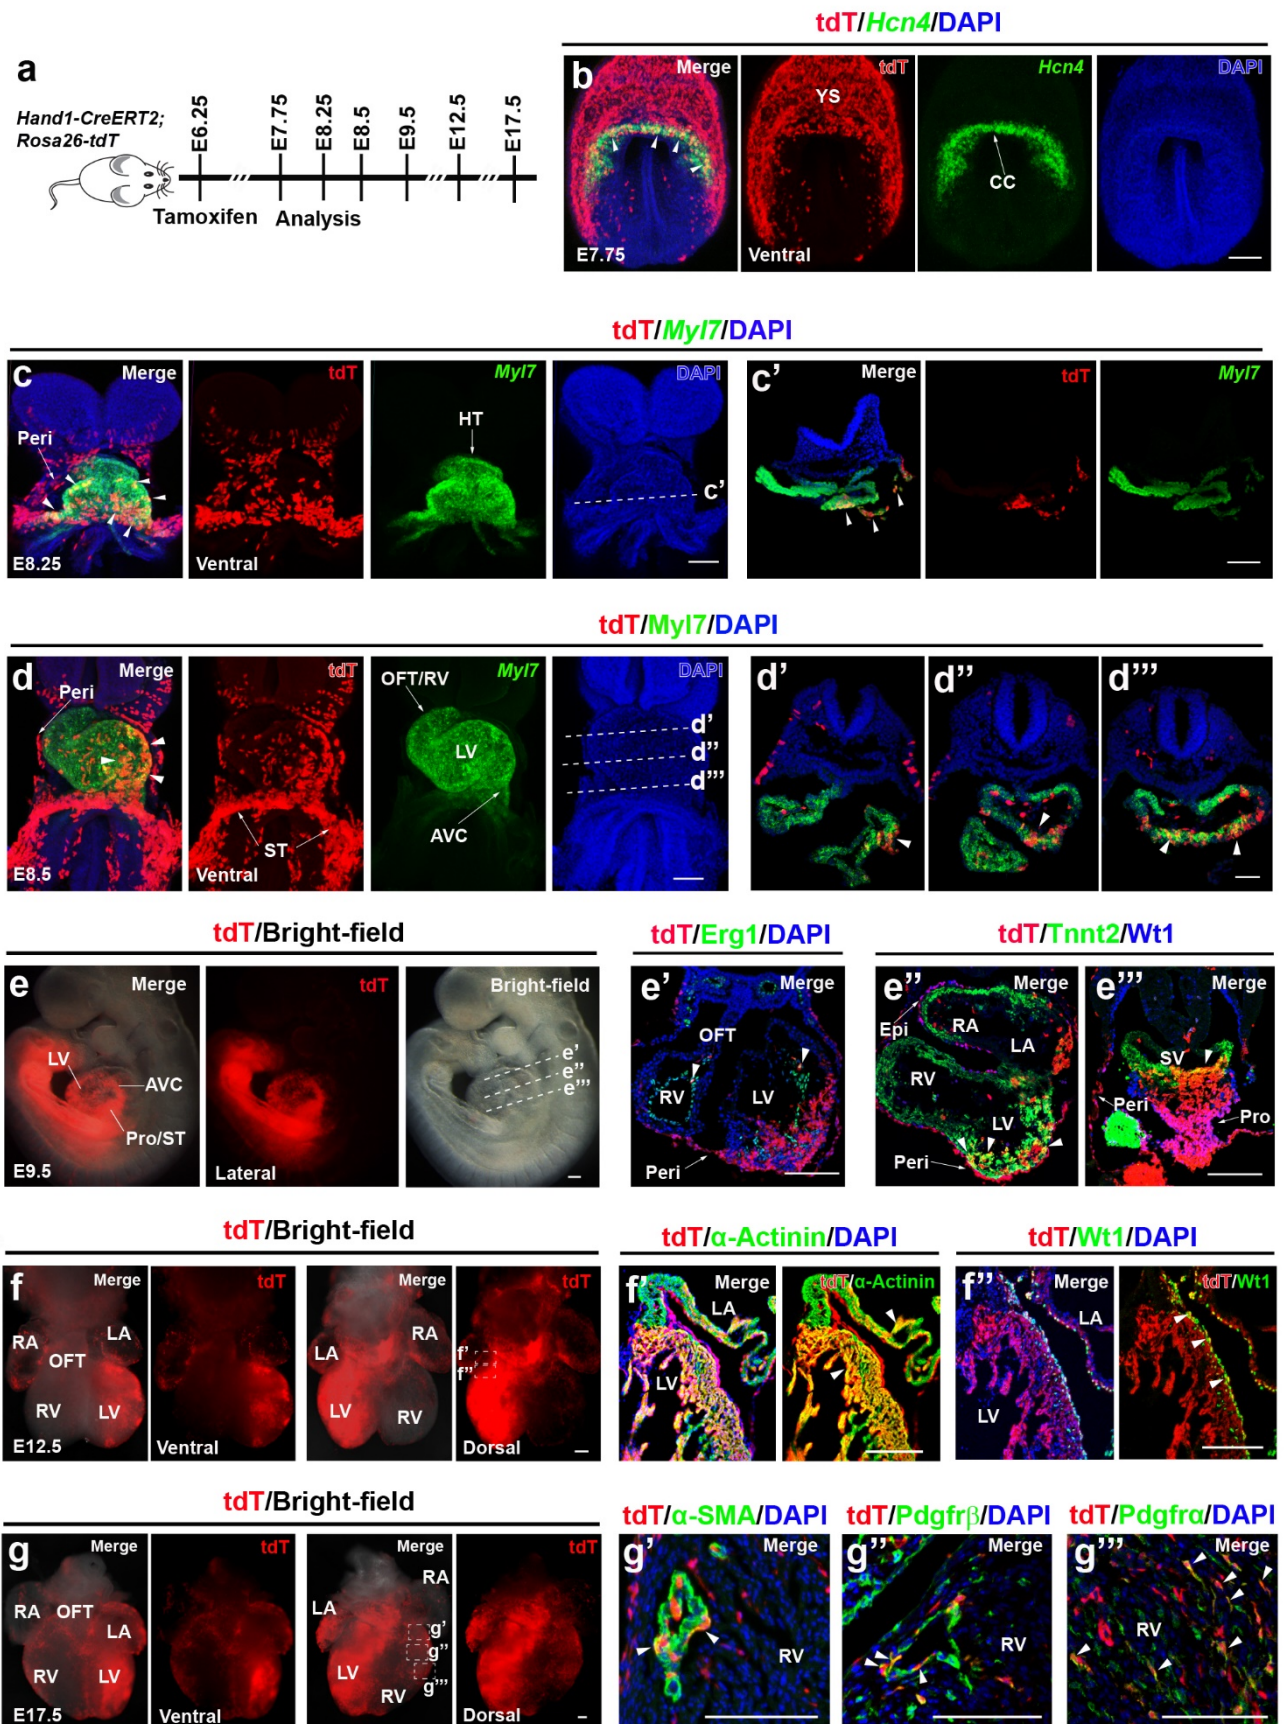

1003 **Extended Data Figure 13. Lineage tracing studies marking *Hand1*+ progenitors at**  
1004 **E6.25 reveal that these cells contribute to first heart lineage cardiomyocytes and serosal**  
1005 **mesothelial lineages (pericardial, epicardial cells) in the heart.** a, Schematic outlines the  
1006 experimental strategy for *Hand1-CreERT2* genetic fate mapping studies shown in **b-g**.  
1007 Tamoxifen was given at E6.25, and *Hand1-CreERT2*; *Rosa26-tdT* embryos were examined  
1008 for tdT localization at E7.75, E8.25, E8.5, E9.5, E12.5 and E17.5. RNAscope *in situ*  
1009 hybridization and immunohistochemistry of whole mount and cross sections of these  
1010 embryos (as indicated in each panel) reveal the contribution of *Hand1-CreERT2* genetically-  
1011 labeled tdT+ cells at **(b)** E7.75, **(c)** E8.25, **(d)** E8.5 **(e)** E9.5, **(f)** E12.5 and **(g)** E17.5. **c'**, **d'**-  
1012 **d'''**, **e'-e'''**, Insets show transverse sections of **c**, **d**, **e** at indicated dashed lines, respectively.  
1013 **f'**, **f''** and **g'-g'''**, Inset shows representative coronal sections of **f** and **g** at indicated dashed  
1014 boxes, respectively. Arrowheads point to tdT+ cells expressing **(b)** *Hcn4*, **(c, d)** *Myl7*, **(e')**  
1015 *Erg1*, **(e'')** *Tnnt2*, **(e''', f')** *Wt1*, **(f')**  $\alpha$ -Actinin, **(g')**  $\alpha$ -SMA, **(g'')** *Pdgfr $\beta$*  and **(g''')** *Pdgfra*.  
1016 n = 3 for each condition. Scale bars, 100  $\mu$ m. Embryos analyzed at E17.5 were given 0.05  
1017 mg/g tamoxifen, half the dose given to embryos analyzed at earlier timepoints. AVC,  
1018 Atrioventricular Canal; CC, Cardiac crescent; Epi, Epicardium; HT, Heart tube; LA, Left  
1019 Atrium; LV, Left Ventricle; RA, Right Atrium; RV, Right Ventricle; OFT, Outflow Tract;  
1020 Peri, Pericardium; Pro, Proepicardium; ST, Septum transversum; SV, Sinus Venosus; YS,  
1021 Yolk sac.



1022

## Extended Data Figure 14

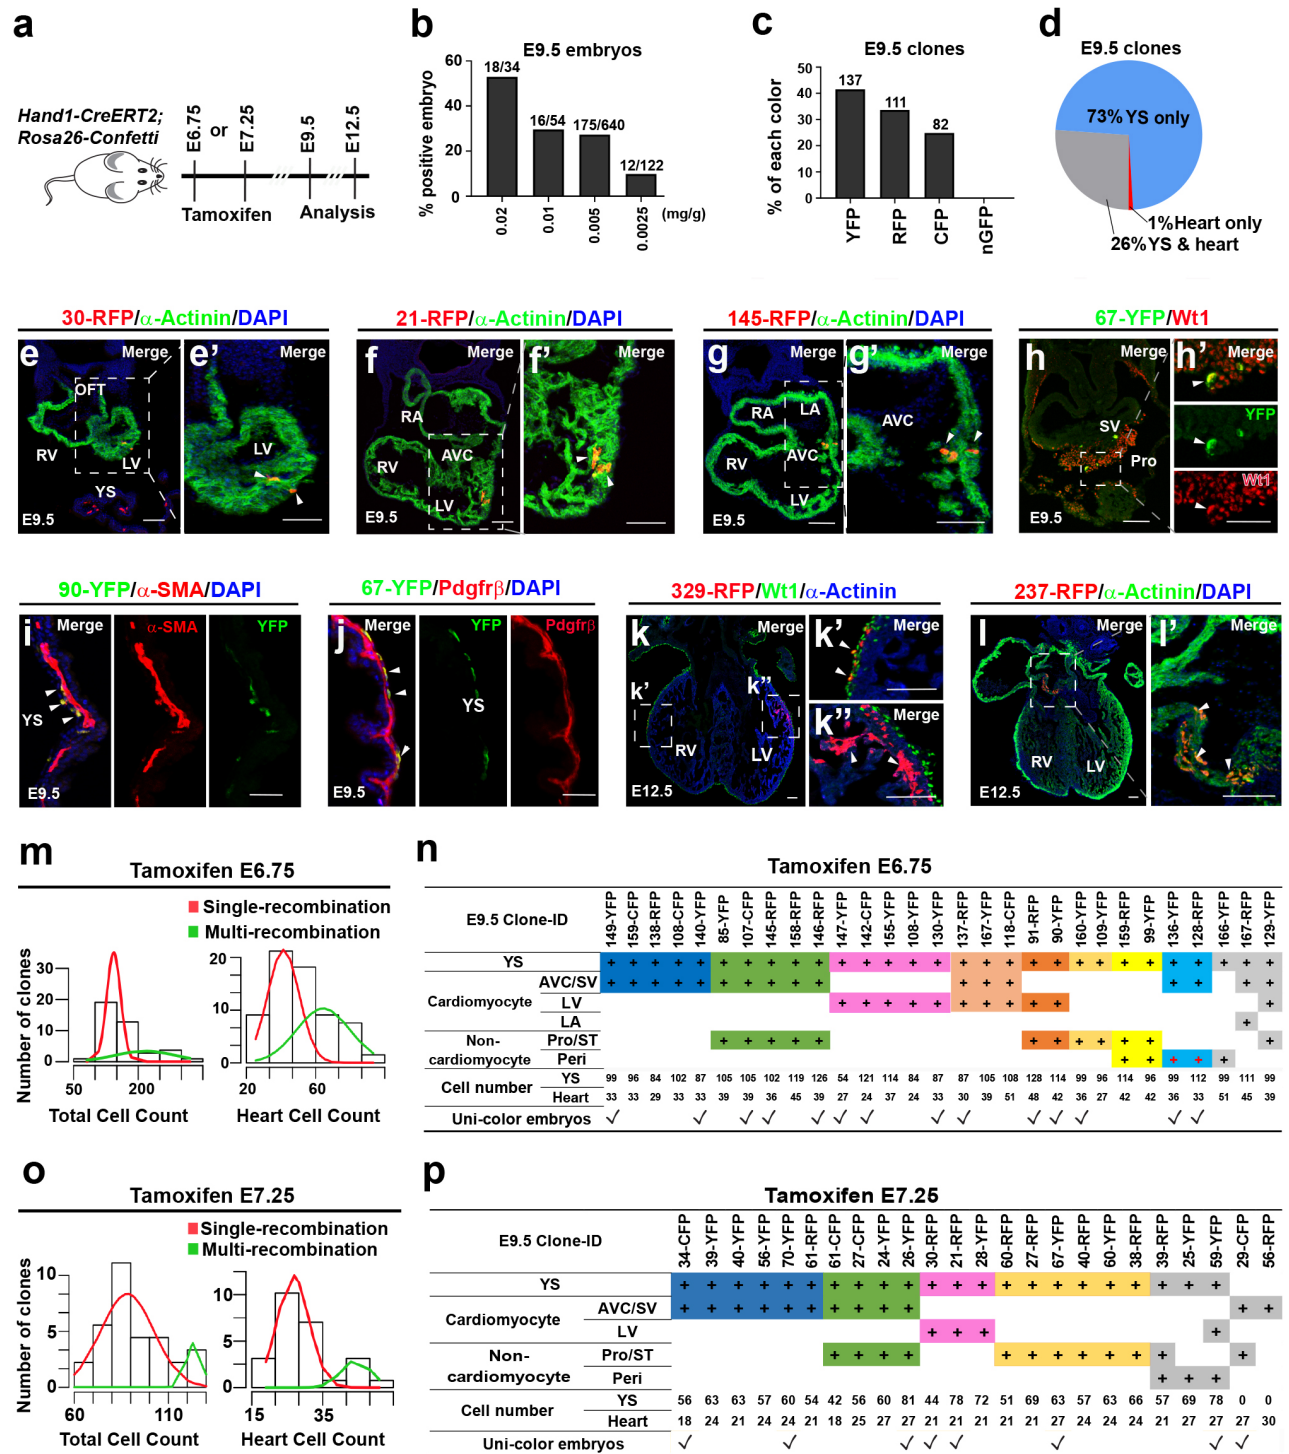

1023

1024 **Extended Data Figure 14. Quantitative analysis of clones and their cell type**  
1025 **identification reveal the contribution of *Hand1*+ progenitor clones to specific cell**  
1026 **lineages of the heart and yolk sac.** **a**, Schematic outlines experimental strategy for *Hand1*-  
1027 *CreERT2*; *Rosa26-Confetti* clonal analyses in **b-p**. **b**, Bar graph reveals the percentage of  
1028 E9.5 embryos that displayed fluorescence at titrated doses of tamoxifen. **c**, Bar graph  
1029 displays the frequency of each fluorophore expressed in E9.5 *Hand1-CreERT2*; *Rosa26-*  
1030 *Confetti* embryos that were induced with 0.005 mg/g tamoxifen. **d**, Pie chart shows the  
1031 contribution of *Hand1-CreERT2*; *Rosa26-Confetti* clones to respective tissues. **e-l**,  
1032 Immunohistochemistry of (**e-j**) E9.5 and (**k-l**) E12.5 *Hand1-CreERT2*; *Rosa26-Confetti*  
1033 embryos reveals the contribution of *Hand1-CreERT2* genetically-labeled clones to specific  
1034 cell types including (**e, f, g, k, l**) cardiomyocytes ( $\alpha$ -Actinin) and (**h, k**) epicardial cells (Wt1)  
1035 in the heart as well as (**i**) smooth muscle cells ( $\alpha$ -SMA) and (**j**) mesothelial cells (Pdgfr $\beta$ ) in  
1036 the yolk sac. **e'-h', k', k'', l'**, Insets are magnification of **e-h, k, l** boxed area. Arrowheads  
1037 point to *Hand1-CreERT2*; *Rosa26-Confetti* labeled clones expressing (**e', f', g', k'', l'**)  $\alpha$ -  
1038 Actinin, (**h', k'**) Wt1, (**i**)  $\alpha$ -SMA, and (**j**) Pdgfr $\beta$ . ID number for each clone analyzed is  
1039 indicated in panels. Scale bars = 100  $\mu$ m. **m, o**, Histograms show the number of (**m**) E6.75  
1040 and (**o**) E7.25 genetically-labeled clones with a specific cell count (total or only in the heart).  
1041 Gaussian distributions representing single (red line) and multiple (green line) recombinant  
1042 events were modeled on this data. Based on these distributions, only clones that likely  
1043 derived from a single recombination events were analyzed. These clones and their  
1044 contributions to specific cell types are shown in (**n**) and (**p**), respectively. Unicolor embryos  
1045 which are shown in Figure 5 are denoted by check mark on bottom of tables. AVC,  
1046 Atrioventricular Canal; LA, Left Atrium; LV, Left Ventricle; RA, Right Atrium; RV, Right  
1047 Ventricle; OFT, Outflow Tract; Peri, Pericardium; Pro, Proepicardium; ST, Septum  
1048 transversum; SV, Sinus Venosus; YS, Yolk sac.

1049  
1050  
1051  
1052  
1053  
1054  
1055  
1056  
1057  
1058  
1059  
1060  
1061  
1062  
1063  
1064  
1065  
1066  
1067  
1068  
1069  
1070  
1071  
1072  
1073

**Supplementary Table 1. Differential gene expression analyses assign cell identities to scRNA-seq *Mesp1*-Cre clusters.** Table displays differentially expressed marker genes for each cluster appearing in Figure 1 as defined in Methods. All tests are Wilcoxon rank sum tests. Column titles indicate the following information: gene – gene marker analyzed; cluster name – cluster expressing gene marker; p\_val – unadjusted p-value of association with the cluster in contrast to all cells not in the cluster; avg\_logFC average – average log<sub>2</sub> change between the expression of the marker in the cluster versus all cells not in the cluster; pct.1 – percentage of cells in the marked cluster that express the gene at a non-zero level; pct.2 – percentage of cells not in the marked cluster that express the gene at a non-zero level; p\_val\_adj – multiple hypothesis adjusted p-value of association with the cluster in contrast to all cells not in the cluster; and cluster – numeric ID of the cluster as assigned in Figure 1.

**Supplementary Table 2. Differential gene expression analyses assign cell identities to cardiac subclusters.** Table displays differentially expressed genes for each cardiac subcluster appearing in Figure 2. All tests are Wilcoxon rank sum tests. Column titles indicate the following information: gene – gene marker analyzed; cluster name – cardiac subcluster expressing gene marker; p\_val – unadjusted p-value of association with the subcluster in contrast to all cells not in the subcluster; avg\_logFC average – average log<sub>2</sub> change between the expression of the marker in the subcluster versus all cells not in the subcluster; pct.1 – percentage of cells in the marked subcluster that express the gene at a non-zero level; pct.2 – percentage of cells not in the marked subcluster that express the gene at a non-zero level; p\_val\_adj – multiple hypothesis adjusted p-value of association with the subcluster in contrast to all cells not in the subcluster.

1074 **Supplementary Table 3. Gene expression analyses reveals genes differentially**  
1075 **expressed in branches at each branchpoint analyzed in the cardiomyocyte trajectories.**  
1076 Tables display genes that are differentially expressed between branches at each branch point  
1077 analyzed in Extended Data Figure 6. All tests are Wilcoxon rank sum tests. Each sheet  
1078 shows genes that are differentially expressed at corresponding branch points as indicated in  
1079 the sheet name. Column titles indicate the following information: gene – gene marker  
1080 analyzed; p\_val – unadjusted p-value of association between two branches analyzed at  
1081 respective branch point; avg\_logFC average – average log2 change of gene expression  
1082 between the two indicated branches analyzed; pct.1 and pct. 2 – percentage of cells  
1083 expressing the gene in each branch as indicated in the column header; p\_val\_adj – multiple  
1084 hypothesis adjusted p-value of differential expression between the two branches.

1085

1086 **Supplementary Table 4. Primer and sequence for making or genotyping *Hand1-***  
1087 ***CreERT2*, *Rosa26-tdTomato* and *Rosa26-Confetti* mice are shown.** PCR primer,  
1088 *CreERT2* and gRNA sequences are provided for the making or genotyping of *Hand1-*  
1089 *CreERT2*, *Rosa26-tdT* and *Rosa26-Confetti* mice.

1090 **Methods**

1091 **Animal models**

1092 Animal studies were conducted in strict compliance with protocols approved by  
1093 the Institutional Animal Care and Use Committee of the University of California, San Diego  
1094 (UCSD) (A3033-01) and *the Guide for the Care and Use of Laboratory Animals* published  
1095 by the National Institutes of Health. Mice were kept in IVC disposable cages (Innovive),  
1096 under a 12-hour light cycle and bred on the Black Swiss background (Charles River Labs).  
1097 We used *Mesp1-Cre*, *Rosa26-tdT* and *Rosa26-Confetti* mouse lines for our studies, which  
1098 have been previously described<sup>19,20,63</sup>. The *Hand1-CreERT2* knock-in line was made as  
1099 described<sup>76</sup>. Briefly, this procedure entailed using Gibson cloning to create a donor DNA  
1100 fragment which contains a *P2a-CreERT2* sequence surrounded by 1600 bps of homology  
1101 sequence to the second exon of *Hand1* (See Supplementary Table 4 for primer sequences).  
1102 This fragment was fully sequenced in order to ensure that mutations had not been introduced.  
1103 The donor DNA (0.6 $\mu$ M) with Cas9 protein (NEB #M0646T), crRNA and tracrRNA were  
1104 injected in a 1:1:1:1 molar ratio into mouse zygotes by the UCSD Transgenic and Knockout  
1105 Mouse Core (See Supplementary Table 4 for crRNA sequence). Four independent founders  
1106 were recovered, of which three displayed strong Cre activity and expression. No differences  
1107 were detected among these three founders, which were further propagated and used for  
1108 experiments. Additionally, RNAscope *in situ* hybridization (ISH) confirmed that expression  
1109 of *CreERT2* from these mice recapitulates expression of endogenous *Hand1* (Fig. 4e,  
1110 Extended Data Fig. 10c, d). For genotyping, genomic DNA was extracted by adding 75  $\mu$ l  
1111 of 25 mM NaOH, 0.2 mM EDTA to a 2 mm tail clipping and heating at 98°C for 30 minutes.  
1112 The solution was then neutralized by adding 75  $\mu$ l of 40 mM Tris-HCl (pH 5.5). A 1:50  
1113 dilution of genomic DNA template was used for genotyping PCR. Primers matching

1114 sequences upstream of the left homology arm and in the *Cre* gene were used for genotyping  
1115 (See Supplementary Table 4 for primer sequences.).

1116

### 1117 **Embryo dissection and scRNA-seq library generation**

1118 To prepare single cells for scRNA-seq, *Mesp1-Cre; Rosa26-tdT* genetically-labeled embryos  
1119 at E7.25, E7.5, E7.75 and E8.25 were dissected in cold sterile 1 X PBS without  $\text{Ca}^{2+}$ ,  $\text{Mg}^{2+}$   
1120 under a stereo microscope. Embryos were staged based on their morphology<sup>77</sup>. The  
1121 Reichert's membrane and ectoplacental cone were removed, and *Mesp1-Cre; Rosa26-tdT*  
1122 genetically-labeled embryos were selected and imaged. The yolk sac was removed from two  
1123 of the three E8.25 embryos that were processed in order to enrich for cardiac cells.

1124 Individual embryos were placed into a 1.5 ml microfuge tube and incubated in 0.25%  
1125 Trypsin-EDTA (Gibco, Catalog # 25200056) at 37°C with inversion every two minutes for  
1126 30 min until no visible tissue remained. The solution was pipetted once with a p1000 and  
1127 neutralized by adding 0.75 ml DMEM containing 10% FBS (Gibco). Cells were then passed  
1128 through a 100- $\mu\text{m}$  cell strainer (BD Biosciences, Catalog # 352360) and single tdT+ cells  
1129 were obtained by fluorescence-activated cell sorting (FACS) on a BD Influx Cell sorter (BD  
1130 Biosciences). Living cells were gated on FSC, SSC, DAPI- and tdT+. After sorting, cells  
1131 were centrifuged at 300g for 4 minutes and pooled or kept as individual embryos. Libraries  
1132 were prepared using the Chromium Single Cell 3' Library and Gel Bead Kit v2 (PN-120237)  
1133 and Chromium i7 Multiplex Kit (PN-120262) according to instructions from 10X Genomics  
1134 (<https://www.10xgenomics.com/resources/user-guides/>). Prior to sequencing cDNA,  
1135 libraries were verified by the D1000 ScreenTape system (Agilent) and quantified via Qubit™  
1136 Flex Fluorometer (Thermofisher, Catalog # Q33327). All libraries were sequenced twice on  
1137 the HiSeq 4000 (Illumina) at the UCSD genomics core. An initial shallow sequencing run  
1138 was done for quality control and to determine the number of cells captured. An individual

1139 sample was excluded from further analysis due to a low number of reads per cell (60%) as  
1140 analyzed by Cell Ranger (10X genomics). A second deeper sequencing run was  
1141 subsequently performed ensuring an approximate equal read depth per cell across the  
1142 samples, resulting in an average of 60,450 UMIs (unique molecular identifiers) per cell and  
1143 an average sequence saturation of 65.7% (Extended Data Fig. 1b).

1144

#### 1145 **Data processing and clustering**

1146 Reads were analyzed with the Seurat library (version 3.1.5). The data was read into the R  
1147 (version 3.5.3) computing environment and log normalized using the Seurat library's  
1148 `NormalizeData()` function with default parameters. Cells with more than 5 percent  
1149 mitochondrial gene reads or less than 25,000 UMI were excluded. This analysis excluded  
1150 approximately 1,400 cells (Extended Data Fig 1a, b). We then calculated the principal  
1151 components of the data and used the first 10 principal components to calculate tSNE  
1152 projections. Individual samples visualized in these tSNE projections revealed that samples  
1153 overlapped, thus indicating a lack of batch effect (Extended Data Fig. 1c). In order to  
1154 discover an optimal number of clusters for analysis, we also used ten principle components  
1155 and calculated k-means clustering for  $k = 8$  to 25. For each clustering solution  $k$ , we  
1156 observed the average silhouette score. We observed local maxima at  $k = 10, 12$  and 15, and  
1157 chose  $k = 15$  for subsequent analysis (Extended Data Fig. 1d). For each of these clusters, we  
1158 identified genes that were expressed at higher levels in that cluster compared to all other cells  
1159 using default parameters for Seurat's `FindMarkers` function. The complete list of these  
1160 genes along with the clusters that they represent can be found in Supplementary Table 1.  
1161 These genes were examined more closely in order to assign a cell identity to each cluster.  
1162 The most informative markers appear in Figure 1f.

1163

## 1164 **Lineage inference**

1165 In order to infer the developmental relationships between cells in our study, we employed the  
1166 R package URD (version 1.1.0)<sup>28</sup>, which requires the user to declare certain cells to be part of  
1167 the root or the tips of the cell lineage tree. URD then traces routes through a cell-cell nearest  
1168 neighbor graph from the tip cells back to the root cells producing a tree-topology that  
1169 summarizes the consensus routes from each tip back to the root cells. We used all cells from  
1170 our earliest stage E7.25 (No bud) as the root of the tree, and cells of clusters that contained  
1171 the most differentiated cell-types at the latest stage E8.25 (1-4 somite) as the tips. For the  
1172 URD in Figure 2a, cells from E8.25 embryos from the following clusters were defined as  
1173 tips: Allantois, A; Blood, B; Cardiomyocyte, CM; Cranial pharyngeal mesoderm, CrPh;  
1174 Endothelium, E; Epithelium, EP; Lateral plate mesoderm, LPM; Late extraembryonic  
1175 mesoderm, LEM; Pre-somitic mesoderm, PSM and Somite mesoderm, SM. For the URD in  
1176 Figure 3a, the same clusters were defined as tips except the CM tip was split into three tips,  
1177 based on the sub-clusters (CM1, CM2, CM3) defined by re-clustering only the cardiomyocyte  
1178 branch as described in the results.

1179 To compare the Pijuan-Sala et al. data<sup>27</sup> with our own, we first limited the analysis of  
1180 their data to the developmental stages that we analyzed (E7.25 - E8.5). Analogous clusters  
1181 between our data and theirs were determined by identifying the clusters which had the  
1182 greatest number of identical marker genes. Marker genes for clusters in Pijuan-Sala et al.  
1183 were defined as genes significantly associated to each cluster (adjusted p-val <0.05) as  
1184 reported on their data portal (<https://marionilab.cruk.cam.ac.uk/MouseGastrulation2018/>).  
1185 Marker genes in our data were determined as described above in Data processing and  
1186 clustering section. To identify the clusters with the greatest number of identical marker  
1187 genes between our dataset and the Pijuan-Sala et al. dataset, the number of marker genes  
1188 from each of our clusters that match each of their clusters was divided by the total number of



1189 marker genes for the relevant cluster in our dataset. This value represents the size-  
1190 normalized overlap between clusters in the two datasets and was plotted as a heatmap  
1191 (Extended Data Fig. 3c). Clusters with maximal overlap were considered analogous  
1192 between the two datasets. An URD tree was then created using analogous root (all E7.25  
1193 cells) and tip clusters as defined above. The cardiomyocyte branch of this URD tree was  
1194 shown (Extended Data Fig. 3d).

1195

### 1196 **Branch point differential analysis**

1197 At each branch point along the three cardiomyocyte developmental trajectories (Figure 3a,  
1198 CM1, CM2, CM3), we used a Random Forest model<sup>44</sup> to identify transcription factors likely  
1199 to be responsible for cells choosing one branch over another. For this algorithm, we defined  
1200 contrasting classes of cells as the first ~300 daughter cells for each branch that was compared  
1201 at corresponding branch points. The feature set was defined as transcription factors (as  
1202 identified by the Gene Ontology, DNA Binding, GO:0003677 term and manual annotation<sup>78</sup>).  
1203 We used these contrasting classes and the feature set in the R library randomForest's main  
1204 function randomForest() using default parameters (except the importance=TRUE option was  
1205 set to return the feature importance measures). The importance measure used here is the  
1206 mean decrease in accuracy measure (the default for RandomForest()), which quantifies the  
1207 decrease in prediction accuracy of a class when the variable in question is randomly  
1208 permuted. The top ten most important transcription factors that determined each class were  
1209 plotted (Extended Data Fig. 6b). The differential analysis between branches at each branch  
1210 point used the contrasting classes of cells defined above, but examined all genes (instead of  
1211 just transcription factors) using Seurat's FindMarkers() function, with default parameters.  
1212 The top twenty differentially positive expressed genes for each class as determined by their  
1213 log-fold change were plotted (Extended Data Fig. 6d-g).

1214

### 1215 **Pseudotime Trace Analysis**

1216 We used URD-defined pseudotime<sup>28</sup> for our pseudotime analysis: which is the average  
1217 number of transitions over edges of the nearest neighbor graph required to reach each cell  
1218 from the root. In order to produce the pseudotime traces, we ordered cells along each  
1219 lineage according to the URD-inferred pseudotime using URD's `geneCascadeProcess()`  
1220 function (Extended Data Fig. 7a-c). The scaled expression from Seurat of each marker gene  
1221 in each cell was plotted as a heatmap (Extended Data Fig. 7d-f) and as a smoothed spline  
1222 (Extended Data Fig. 7g-i). Pseudotime stages (early, middle, late) were defined based on  
1223 gene expression peak coherence in the smooth spline plots.

1224

### 1225 **Tamoxifen treatment**

1226 To determine the developmental stage of embryonic development during which tamoxifen  
1227 treatment was administered, noon on the day of the vaginal plug was assumed to be E0.5.  
1228 For lineage tracing studies, tamoxifen (Sigma, T5648-1G, 0.1 mg/g body weight) was fed to  
1229 pregnant mice by gavage, except for embryos harvested at E17.5 when a lower dose of  
1230 tamoxifen was used (0.05 mg/g body weight). For the clonal analysis, tamoxifen was  
1231 administered by intraperitoneal injection.

1232

### 1233 **Lineage tracing and clonal analysis**

1234 For lineage and clonal analyses, *Hand1-CreERT2* mice were crossed with *Rosa26-tdT* or  
1235 *Rosa26-Confetti* mice respectively. Genetically-labeled embryos were identified using a  
1236 fluorescent stereo microscope (ZEISS AXIO Zoom.V16 or LEICA M205 FA). Embryos  
1237 younger than E9.5 were imaged using a confocal microscope (Nikon C2), while embryos  
1238 older than E9.5 were imaged with a fluorescent stereo microscope and then imaged with the

1239 confocal microscope after sectioning. Embryos were embedded and sectioned into 10 or 20  
1240  $\mu\text{m}$  sections for lineage tracing or clonal analysis, respectively. To determine the number of  
1241 cells in a clone, sections from an individual embryo were processed and distributed evenly  
1242 across three slides for E9.5 embryos, or five slides for E12.5 hearts. All cells from an  
1243 individual clone on one slide were then counted. The total number of cells per clone was  
1244 then calculated by multiplying the number of cells in a clone on a single slide by the number  
1245 of slides.

1246 Tamoxifen perdurance was determined by incubating E8.25 embryos in serum collected  
1247 from Black Swiss females 32 or 48 hours after they were given tamoxifen (0.1 mg/g).  
1248 Serum was collected by centrifuging (2x 400g for 6 mins) blood collected via retro-orbital  
1249 bleeding and then frozen at  $-80^{\circ}\text{C}$ . Separately, E8.25 embryos were obtained from *Hand1-*  
1250 *CreERT2* x *Rosa26-tdT* crosses without tamoxifen administration and dissected in 5%  
1251 FBS/Fluorobrite DMEM media (ThermoFisher, Cat. no. A1896701 and 10082139) on a  $37^{\circ}\text{C}$   
1252 heated stage (Tokai Hit, TPi-SZX2AX). Care was taken to remove the Reichert's  
1253 membrane, but not the ectoplacental cone. Embryos were then incubated at  $37^{\circ}\text{C}$  in 5%  $\text{CO}_2$   
1254 for 12 hours in 2 ml of pre-warmed serum collected from tamoxifen-injected females. After  
1255 incubation, embryos were fixed in 4% PFA and processed for immunofluorescence with anti-  
1256 tdT antibody. Embryos which did not display tdT were genotyped to confirm that they  
1257 contained both *Hand1-CreERT2* and *Rosa26-tdT* DNA. Three independent experiments  
1258 were performed.

1259

## 1260 **RNAscope Fluorescent *in situ* hybridization**

1261 Whole-mount RNAscope fluorescent *in situ* hybridizations (ISH) were conducted using the  
1262 RNA-scope Multiplex Fluorescent Reagent Kit v.2 (Advanced Cell Diagnostics, 323100)  
1263 with several adaptations. Embryos were dissected in RNase-free 1X PBS and fixed in 4%

1264 PFA overnight at 4°C. Embryos were then washed 3 times in 0.1%Tween20/PBS (PBT),  
1265 followed by dehydration into and then re-hydration from methanol using 5 minute 25%, 50%,  
1266 75% and 100% Methanol/PBT washes. Probe hybridization was performed at 50°C. For  
1267 samples that were co-stained with antibodies after the RNAscope ISH, samples were  
1268 incubated in 10% heat-inactivated donkey serum for 2 hours at room temperature prior to  
1269 addition of primary antibody (see below) overnight at 4°C. The embryos were then washed  
1270 3x in PBT and incubated in secondary antibody (see below) for 2 hours in 4°C. Whole-  
1271 mount embryos were imaged after mounting in 1% low melting point agarose in 35 mm glass  
1272 bottom petri dishes (MatTek) using a confocal microscope (Nikon C2). After imaging,  
1273 embryos were embedded and sectioned for further analysis as described in the  
1274 Immunofluorescence, sectioning and image processing section. Catalog numbers for RNA-  
1275 scope probes (ACDbio) used in this study: Cre-O4-C1, Cat No. 546951; Mm-Hcn4-C1, Cat  
1276 No. 421271; Mm-Hand1-C1, Cat No. 429651; Mm-Hand1-C2, Cat No. 429651-C2; Mm-  
1277 Isl1-C2, Cat No. 451931-C2; Mm-Mab2112-C1, Cat No. 456901; Mm-Myl7-C3, Cat No.  
1278 584271-C3; Mm-Mesp1-C3, Cat No. 436281-C3; Mm-Nkx2-5, Cat No. 428241; Mm-Nkx2-  
1279 5-C2, Cat No. 428241-C2; Mm-Nr2f2, Cat No. 480301; Mm-Sfrp5-C1, Cat No. 405001;  
1280 Mm-Smoc2-C1, Cat No. 318541; Mm-Tbx5-C1, Cat No. 519581; Mm-Irx4-C1, Cat No.  
1281 504831; Mm-Tbx5-C2, Cat No. 519581-C2; Mm-Tdgf1-C1, Cat No. 506411.

1282

### 1283 **Immunofluorescence, sectioning and image processing**

1284 Immunofluorescence studies were conducted on cryosections of mouse embryos. Embryos  
1285 were cryoprotected, mounted, sectioned and stained as we previously described<sup>12</sup>. The  
1286 following primary antibodies were used: mouse anti-TNNT2 antibody (Invitrogen, Catalog #  
1287 MA5-12960, 1:50), Chicken anti-GFP antibody (Abcam, ab13970, 1:300), Rabbit anti-ERG1  
1288 antibody (Abcam, ab92513, 1:300), Rabbit anti-WT1(Abcam, ab89901, 1:200), Rabbit anti-

1289 PDGFR $\alpha$  antibody (Abcam, ab203491, 1:200), Rabbit anti-PDGFR $\beta$  antibody (Abcam,  
1290 ab32570, 1:200), Rat Anti-Mouse CD31 (BD Pharmingen, cat# 553708, 1:500), Rabbit anti-  
1291  $\alpha$ -smooth-muscle-actin (Abcam, ab15734, 1:200), Rabbit anti- $\alpha$ -Actinin (Abcam, ab68167,  
1292 1:200), Mouse anti- $\alpha$ -Actinin(Sigma, A-7811, 1:500), Goat Anti-tdTomato (SICGEN,  
1293 AB8181-200, 1:500). The following secondary antibodies were diluted 1:250 in  
1294 0.125%PBST with DAPI (Invitrogen, Catalog # D1306, 1:1000) and incubated for 1.5 hour at  
1295 RT: Donkey Anti-Rabbit IgG-Alexa 488, 594, 647 (Invitrogen, Catalog # A32790, # A32754,  
1296 # A32795); Donkey anti-Goat IgG-Alexa 594 (Invitrogen, Catalog # SA5-10088), Donkey  
1297 anti-Mouse IgG-Alexa 488 (Invitrogen, Catalog # A32766), Goat anti-Chicken IgG-Alexa  
1298 488 (Invitrogen, Catalog # A32931), Donkey anti-Rat IgG-Alexa 488 (Invitrogen, Catalog  
1299 # A-21208). All images were processed using Nikon NIS Elements software, ImageJ and  
1300 Adobe Illustrator.

1301

### 1302 **Statistical Analysis of Clonal Events**

1303 To ensure that the clones we analyzed were the result of a single recombination event, we  
1304 employed several different techniques including 1) using a low dose of tamoxifen, 2) utilizing  
1305 the *Rosa26-Confetti* mouse line in which for each recombination event, only one of four  
1306 different fluorophores is expressed, 3) separately analyzing unicolor embryos as well as  
1307 multi-color embryos and 4) applying a rigorous statistical analysis based on the number of  
1308 cells in a clone in order to exclude single color clones that may have resulted from two  
1309 recombinant events. This statistical analysis involved embryos harvested at E9.5 in which  
1310 single color clones were noted in both extraembryonic and cardiac regions. In these  
1311 embryos, we calculated the number of cells in each clone. A mixture of two Gaussian  
1312 distributions<sup>64</sup> was fit to the data using expectation maximization. The distribution for the  
1313 counts was then given by:

1314

1315 
$$C = \alpha_1 N(\mu_1, \sigma_1) + \alpha_2 N(\mu_2, \sigma_2)$$

1316 with:

1317 
$$\mu_1 < \mu_2$$

1318  $\alpha_1, \alpha_2$  were the mixing parameters, and  $N(\mu, \sigma)$  was a Gaussian distribution with mean  $\mu$  and  
1319 standard deviation  $\sigma$ . The first of the Gaussian distributions represented the cell count  
1320 distribution from a single recombination event while the other represented the cell count  
1321 distribution from multi-recombination events. This analysis was performed separately on  
1322 E6.75 and E7.25 induced clones. Clones which had a likelihood of belonging to the  
1323 Gaussian distribution with a smaller mean were consider clonal and the clones that fit the  
1324 larger mean Gaussian distribution were considered multiclonal and were excluded from our  
1325 analysis of multipotentiality.

1326

1327 **Statistics and reproducibility**

1328 Replicates and statistical tests are described in the figure legends. No statistical methods  
1329 were used to predetermine sample size. Experiments did not employ randomization nor  
1330 investigator blinding. All experimental results were analyzed with at least three independent  
1331 embryos. Wilcoxon rank sum tests were used for statistical tests for differential gene  
1332 expression analysis including the tests supporting the box and whisker plots. Markers were  
1333 defined by Seurat's default settings (at least  $>0.25$  log fold increase over the opposing group,  
1334 at most  $<0.01$  unadjusted p-value, and at least  $>10\%$  cells expressing). On the boxplots, a p-  
1335 value  $< 0.01$  was considered to be statistically significant as indicated by \*. Box and  
1336 whisker plots were created with standard parameters from ggplot2.

1337

1338 **Reporting summary**

1339 Further information on research design is available in the Nature Research Reporting

1340 Summary linked to this paper.

1341

### 1342 **Data and code availability**

1343 The scRNA-Seq data set supporting results of this article is available in the GEO database.

1344 Visualization of gene expression of the scRNA-seq is available on the UCSC cell browser at

1345 <https://cells.ucsc.edu/>. The R scripts are available upon request.

1346

### 1347 **Method References**

- 1348 12 Liang, X. *et al.* HCN4 dynamically marks the first heart field and conduction system  
1349 precursors. *Circulation research* **113**, 399-407, doi:10.1161/circresaha.113.301588  
1350 (2013).
- 1351 19 Saga, Y. *et al.* MesP1 is expressed in the heart precursor cells and required for the  
1352 formation of a single heart tube. *Development (Cambridge, England)* **126**, 3437-3447  
1353 (1999).
- 1354 20 Madisen, L. *et al.* A robust and high-throughput Cre reporting and characterization  
1355 system for the whole mouse brain. *Nature neuroscience* **13**, 133-140,  
1356 doi:10.1038/nn.2467 (2010).
- 1357 27 Pijuan-Sala, B. *et al.* A single-cell molecular map of mouse gastrulation and early  
1358 organogenesis. *Nature* **566**, 490-495, doi:10.1038/s41586-019-0933-9 (2019).
- 1359 28 Farrell, J. A. *et al.* Single-cell reconstruction of developmental trajectories during  
1360 zebrafish embryogenesis. *Science (New York, N.Y.)* **360**, doi:10.1126/science.aar3131  
1361 (2018).
- 1362 63 Snippert, H. J. *et al.* Intestinal crypt homeostasis results from neutral competition  
1363 between symmetrically dividing Lgr5 stem cells. *Cell* **143**, 134-144,  
1364 doi:10.1016/j.cell.2010.09.016 (2010).
- 1365 64 Benaglia, T., Chauveau, D., Hunter, D., R. & Young, D., S. mixtools: An R Package for  
1366 Analyzing Finite Mixture Models. *Journal of Statistical Software* **32**, 1-29 (2009).
- 1367 76 Yao, X. *et al.* Tild-CRISPR Allows for Efficient and Precise Gene Knockin in Mouse  
1368 and Human Cells. *Developmental cell* **45**, 526-536.e525,  
1369 doi:10.1016/j.devcel.2018.04.021 (2018).
- 1370 77 Downs, K. M. & Davies, T. Staging of gastrulating mouse embryos by morphological  
1371 landmarks in the dissecting microscope. *Development (Cambridge, England)* **118**,  
1372 1255-1266 (1993).
- 1373 78 Harris, M. A. *et al.* The Gene Ontology (GO) database and informatics resource.  
1374 *Nucleic acids research* **32**, D258-261, doi:10.1093/nar/gkh036 (2004).
